# Supplementary material for: Classification tree model of the personal economic burden of dementia care by related factors of both people with dementia and caregivers in Japan: a cross-sectional online survey
Source: PubMed Central journal article supplement — BMJ Open. 2019 Jul 9;9(7):e026733. doi: 10.1136/bmjopen-2018-026733 (PMC6629423; doi:10.1136/bmjopen-2018-026733), 2019-07-09
Supplement: bmjopen-2018-026733.draft_revisions.pdf [file bmjopen-2018-026733.draft_revisions.pdf]

# BMJ Open

BMJ Open is committed to open peer review. As part of this commitment we make the peer review history of every article we publish publicly available.

When an article is published we post the peer reviewers' comments and the authors' responses online. We also post the versions of the paper that were used during peer review. These are the versions that the peer review comments apply to.

The versions of the paper that follow are the versions that were submitted during the peer review process. They are not the versions of record or the final published versions. They should not be cited or distributed as the published version of this manuscript.

BMJ Open is an open access journal and the full, final, typeset and author-corrected version of record of the manuscript is available on our site with no access controls, subscription charges or pay-per-view fees (<http://bmjopen.bmj.com>).

If you have any questions on BMJ Open's open peer review process please email [info.bmjopen@bmj.com](mailto:info.bmjopen@bmj.com)

# BMJ Open

## Classification tree model of the personal economic burden of dementia care by related factors of both people with dementia and caregivers

|                               |                                                                                                                                                                                                                                                                                                                                                                                                                                                                                                                                                                                                                                                                                                                                |
|-------------------------------|--------------------------------------------------------------------------------------------------------------------------------------------------------------------------------------------------------------------------------------------------------------------------------------------------------------------------------------------------------------------------------------------------------------------------------------------------------------------------------------------------------------------------------------------------------------------------------------------------------------------------------------------------------------------------------------------------------------------------------|
| Journal:                      | <i>BMJ Open</i>                                                                                                                                                                                                                                                                                                                                                                                                                                                                                                                                                                                                                                                                                                                |
| Manuscript ID                 | bmjopen-2018-026733                                                                                                                                                                                                                                                                                                                                                                                                                                                                                                                                                                                                                                                                                                            |
| Article Type:                 | Research                                                                                                                                                                                                                                                                                                                                                                                                                                                                                                                                                                                                                                                                                                                       |
| Date Submitted by the Author: | 17-Sep-2018                                                                                                                                                                                                                                                                                                                                                                                                                                                                                                                                                                                                                                                                                                                    |
| Complete List of Authors:     | Nakabe, Takayo; Kyoto University Graduate School of Medicine, Department of Healthcare Economics and Quality Management<br>Sasaki, Noriko; Kyoto University Graduate School of Medicine, Department of Healthcare Economics and Quality Management<br>Uematsu, Hironori; Kyoto University Graduate School of Medicine, Department of Healthcare Economics and Quality Management<br>Kunisawa, Susumu; Kyoto University Graduate School of Medicine, Department of Healthcare Economics and Quality Management<br>Wimo, Anders; Karolinska Institute, KI Alzheimer's Disease Research Center (ADRC)<br>Imanaka, Yuichi; Kyoto University Graduate School of Medicine, Department of Healthcare Economics and Quality Management |
| Keywords:                     | Informal care, RUD, Cost, Classification, Japan                                                                                                                                                                                                                                                                                                                                                                                                                                                                                                                                                                                                                                                                                |
|                               |                                                                                                                                                                                                                                                                                                                                                                                                                                                                                                                                                                                                                                                                                                                                |

SCHOLARONE™  
Manuscripts

Only

1  
2  
3  
4  
5  
6 1 Classification tree model of the personal economic burden of  
7  
8 2 dementia care by related factors of both people with dementia and  
9  
10 3 caregivers  
11  
12 4

13  
14  
15  
16  
17 5 Takayo Nakabe<sup>a</sup>, Noriko Sasaki<sup>a</sup>, Hironori Uematsu<sup>a</sup>, Susumu Kunisawa<sup>a</sup>, Anders  
18  
19 6 Wimo<sup>b</sup>, Yuichi Imanaka<sup>a</sup>

20  
21  
22 7 <sup>a</sup> Department of Healthcare Economics and Quality Management, Graduate School of  
23  
24 8 Medicine, Kyoto University, Yoshida Konoe-cho, Sakyo-ku, Kyoto, Japan.

25  
26  
27 9 <sup>b</sup> Aging Research Centre, Department of Neurobiology, Care Sciences and Society  
28  
29 10 (NVS), Karolinska Institutet and Stockholm University, Stockholm, Sweden  
30  
31

32  
33  
34 11 Corresponding author:

35  
36  
37 12 Yuichi Imanaka, Professor

38  
39  
40 13 Department of Healthcare Economics and Quality Management,

41  
42  
43 14 Graduate School of Medicine, Kyoto University

44  
45  
46 15 Yoshida Konoe-cho, Sakyo-ku, Kyoto 606-8501, Japan

47  
48  
49 16 E-mail: imanaka-y@umin.net

50  
51  
52 17 Tel: +81-75-753-4454 Fax: +81-75-753-4455

53  
54  
55 18 Word counts: 3750 words  
56  
57  
58  
59  
60

1  
2  
3  
4  
5 19 **Abstract**

6  
7 20 **Objective:**

8  
9  
10 21 The purpose of this study was to clarify the micro-level determinants of the economic  
11  
12 22 burden of dementia care at home in community settings by classifying them into  
13  
14  
15 23 subgroups of factors related to people with dementia and their caregivers.  
16  
17

18 24 **Methods**

19  
20  
21 25 A cross-sectional online survey was conducted from March 7 to March 14, 2016. For  
22  
23  
24 26 the calculation of informal care costs, the average wage stratified by sex and age group  
25  
26  
27 27 was used as the opportunity cost. We conducted a chi-square automatic interaction  
28  
29  
30 28 detection analysis to identify the factors related to each cost divided into sub categories.  
31

32 29 **Results**

33  
34  
35 30 In the resultant classifications, informal care cost was mainly related to caregivers'  
36  
37  
38 31 employment status. When caregivers acquired family care leave, informal care costs  
39  
40  
41 32 were the highest. On the other hand, out-of-pocket payments for long-term care were  
42  
43  
44 33 related to care-need levels and family economic status. ADL and IADL functions such  
45  
46  
47 34 as bathing, toileting, and cleaning were related to all costs.  
48

49 35 **Conclusion**

50  
51  
52 36 This study clarified the difference in dementia care costs between classified  
53  
54  
55 37 subgroups by considering the combination of the situations of both people with  
56  
57

1  
2  
3  
4  
5  
6 38 dementia and their caregivers. Informal care costs were related to caregivers'  
7  
8  
9 39 employment and cohabitation status rather to the situations of people with dementia. On  
10  
11 40 the other hand, out-of-pocket payments for long-term care services were related to  
12  
13  
14 41 care-need levels and family economic status. These classifications will be useful in  
15  
16  
17 42 understanding which situation represents a greater economic burden, and helpful in  
18  
19  
20 43 improving the sustainability of the dementia care system in Japan.  
21  
22 44

Peer review only

1  
2  
3  
4  
5  
6 45 **Strengths and limitations of this study**  
7

8 ● This study clarified the difference in dementia care costs between classified  
9  
10  
11  
12 47 subgroups by considering the combination of the situations of both people with  
13  
14  
15 48 dementia and their caregivers.

16  
17 ● The chi-square automatic interaction detection dendograms provide a visual  
18  
19  
20 50 depiction of criteria and predictor variable interactions that might not be detected in  
21  
22  
23 51 traditional analytic procedures.

24  
25 ● The sample may therefore not be representative of all caregivers because the  
26  
27  
28 53 sample is limited to those who have access to the Internet and are registered with an  
29  
30  
31 54 Internet research company.

32  
33  
34 ● We only assessed objective burden of dementia care such as informal care time or  
35  
36  
37 56 costs, then we didn't consider the subjective burden of care and depressive  
38  
39  
40 57 symptoms.

41  
42  
43 58  
44  
45  
46  
47  
48  
49  
50  
51  
52  
53  
54  
55  
56  
57  
58  
59  
60

## 59 **1. Introduction**

60 In the aging society of Japan, it is estimated that there are approximately 4.7 million  
61 people living with dementia and that there will be approximately 7 million people with  
62 dementia in 2025 [1]. Given that it is also estimated that the total number of people with  
63 dementia throughout the world will double every 20 years [2], we need to reconsider  
64 how to prepare for dementia care in the community.

65 Long-term care (LTC) services in Japan used by people with dementia in home care  
66 can be classified into three main types: (1) LTC insurance services, (2) LTC services not  
67 covered by insurance, and (3) informal care as mutual assistance by family members.

68 When a person with dementia uses the LTC insurance service, the user bears 10% or  
69 20% of the service expenses as out-of-pocket payments depending on the person's  
70 income (Article 49-2 of the Long-Term Care Insurance Act). Aside from such  
71 copayments, when LTC services not covered by insurance or exceeding the LTC  
72 insurance limit amount are used, people must pay the full amount. Furthermore, it has  
73 been pointed out that informal care is an important component of home care, yet it  
74 places a burden on caregivers [3,4]. Nevertheless, given the estimates of the societal  
75 costs of dementia care throughout the world, the impact of informal care is essential  
76 [5,6].

77 The Japanese government recommends policies to shift to patient-centered and

1  
2  
3  
4  
5  
6 78 home-centered care to reduce the fiscal burden of the insurance system on  
7  
8  
9 79 community-based integrated systems. While micro level of impact of dementia care has  
10  
11 80 not been insufficiently understood[7], to construct a sustainable dementia care system,  
12  
13  
14 81 we clarified the personal economic burden of dementia care for different residence types  
15  
16  
17 82 and demonstrated that the cost at home in a community setting was equal to or higher  
18  
19  
20 83 than in various institutions[8]. Sustainable dementia care systems should be provided  
21  
22  
23 84 not only to benefit the government or insurance system but also to benefit people with  
24  
25  
26 85 dementia and their caregivers. Furthermore, although there are increasing dementia care  
27  
28  
29 86 costs related to the severity of dementia [9–12], it can be seen that the cost of dementia  
30  
31  
32 87 care increases through the interaction of characteristics or situations of people with  
33  
34  
35 88 dementia and their caregivers. Given this interaction, it is necessary to understand the  
36  
37  
38 89 actual conditions by classifying cases where the greatest economic burdens in dementia  
39  
40  
41 90 care are felt.

42  
43 91 Therefore, the purpose of this study is to clarify the micro-level determinants of the  
44  
45  
46 92 economic burden of dementia care at home in community settings by classifying them  
47  
48  
49 93 into subgroups of factors related to people with dementia and their caregivers.

50  
51 94

## 52 53 95 **2. Methods**

54  
55 96 This study was a cross-sectional study, based on a self-rated, web-based questionnaire  
56  
57



1  
2  
3  
4  
5  
6 97 survey. The economic burden of dementia care in this study is roughly divided into  
7  
8  
9 98 informal care costs as opportunity costs and out-of-pocket payments that people actually  
10  
11 99 made.

#### 100 *2.1. Web-based survey for data collection on people with dementia and their caregivers*

101 In this cross-sectional study, we conducted a web-based questionnaire survey from  
102 March 3 to March 14, 2016 in cooperation with a commercial research company  
103 (Automatic Internet Research System, Macromill, Inc., Japan). Potential participants  
104 fulfilled the following criteria: (1) aged 30 years or older, (2) non-professional caregiver  
105 of someone with dementia, (3) caring for only one person with dementia, and (4) having  
106 no conflicts of interest with advertising or marketing research entities. A total of 3,600  
107 participants were recruited from the research company's registrants and divided into  
108 different age groups (850 participants each in the groups aged in 30's, 40's, 50's, and  
109 60's; 200 participants in the group aged  $\geq 70$  years). We excluded caregivers under 29  
110 years of age because, in Japan, they are estimated to represent only 2% of all caregivers  
111 [13].

#### 112 *2.2. Questionnaire*

113 Resource Utilization in Dementia (RUD) [15, 16] is a widely used tool to collect data  
114 about resource use in persons with dementia and their caregivers [15]. RUD is available

1  
2  
3  
4  
5  
6 115 in more than 60 languages and it is widely used throughout the world. In this study, we  
7  
8  
9 116 used RUD (Japanese version) items related to the characteristics of people with  
10  
11 117 dementia and their caregivers, informal care time, employed situation of caregivers,  
12  
13  
14 118 residential types of people with dementia, and resource use of nursing care services. We  
15  
16  
17 119 added items related to LTC services and residential types. The questionnaire  
18  
19  
20 120 components were divided into four categories: (1) characteristics of people with  
21  
22 121 dementia, (2) caregivers' situations (e.g., employment and cohabitation status), (3)  
23  
24  
25 122 informal care duration and (4) frequency of utilization of LTC services.

26  
27  
28 123 In this project, we could not get information about severity of dementia data because  
29  
30  
31 124 it was regarded as too difficult for caregivers to estimate that. However, we asked for  
32  
33  
34 125 substantial information about care-needs levels. Care needs reflect function, which is a  
35  
36  
37 126 stronger explanatory factor for costs than cognition [14], Care-needs levels  
38  
39  
40 127 (Support-needs levels 1-2, Care-needs levels 1-5) are determined using an  
41  
42  
43 128 evidence-based computer algorithm combined with an expert panel to indicate the  
44  
45  
46 129 amount of care required by each person while taking into consideration their symptoms  
47  
48  
49 130 and functional capability. This algorithm was estimated from the data on how much  
50  
51  
52 131 LTC services were required in 48 hours for more than 3,000 elderly people. High  
53  
54  
55 132 care-needs levels indicate increasing dependency and requirement for LTC services [15].  
56  
57  
58  
59  
60

1  
2  
3  
4  
5  
6 133 Care-need levels also affect the base amount of the maximum payment for LTC services  
7  
8  
9 134 allowance categories covered by insurance.

10  
11 135 *2.3. Informal care time*

12  
13  
14 136 In the questionnaire, informal care time was divided in three domains; support for  
15  
16  
17 137 Activities of Daily Living (ADL), Instrumental Activities of Daily Living (IADL) and  
18  
19  
20 138 Supervision [16]. We asked for the mean caregiving time per day and mean caregiving  
21  
22  
23 139 days per week in the past 30 days. We then multiplied the mean daily caregiving time  
24  
25  
26 140 and caregiving days per week to calculate both weekly and monthly informal care time.  
27  
28  
29 141 Supervision time was excluded in calculating informal care time and costs because  
30  
31  
32 142 supervision could be done simultaneously when caregiving for ADL and IADL  
33  
34 143 functions, or in other housekeeping for people without dementia and other family  
35  
36  
37 144 members.

38  
39  
40 145 *2.4. Cost estimation*

41  
42 146 In this study, we identified three costs as follows: informal care costs, out-of-pocket  
43  
44  
45 147 payments for LTC services covered by insurance (copayments), and out-of-pocket  
46  
47  
48 148 payments for LTC services not covered by insurance. To calculate the informal care  
49  
50  
51 149 costs, there are two methods that are frequently used: the “opportunity cost” and  
52  
53  
54 150 “replacement cost” approaches [17–19]. With the opportunity cost approach it is

1  
2  
3  
4  
5  
6 151 assumed that there is an alternative use of caregiving time (such as paid work) and thus  
7  
8  
9 152 estimates the costs due to this lost opportunity, whereas the replacement cost approach  
10  
11 153 assumes that informal care services can be valued similarly to home care services  
12  
13  
14 154 provided by professional caregivers. Even though many previous studies on the  
15  
16  
17 155 economic valuation of informal care have used the replacement cost approach [18], the  
18  
19  
20 156 ‘opportunity cost approach’ is recommended by the developers of RUD for estimating  
21  
22  
23 157 informal care costs [2,5,20]. We used the opportunity cost approach to assess informal  
24  
25  
26 158 care time as forgone wages for caregivers [2,5,9]. We used caregivers’ monthly mean  
27  
28  
29 159 wages stratified by sex and age to value informal care. We assessed informal care costs  
30  
31  
32 160 for caregivers who were not working or who were over 65 years of age at 35% of the  
33  
34  
35 161 mean wage of employed caregivers [21–24]. A maximum daily informal care time of 16  
36  
37  
38 162 hours was assumed, in order to allow for other activities such as cooking for other  
39  
40  
41 163 family members and sleep [12,25,26]. Caregivers were asked to state their contribution  
42  
43  
44 164 to the total informal care in 5-point scale of 20%. In order to treat all caregivers as  
45  
46  
47 165 primary caregivers and estimate the costs associated with all informal care provided to a  
48  
49  
50 166 patient, we adjusted the informal care time by dividing its time by the median of these  
51  
52  
53 167 contribution levels, according to RUD instructions. This adjustment of informal care  
54  
55  
56 168 time was done only when calculating the informal care costs.  
57  
58  
59  
60

1  
2  
3  
4  
5  
6 169 Out-of-pocket payments for LTC services both covered and not covered by insurance  
7  
8  
9 170 were included in the questionnaire. We asked for these out-of-pocket payments through  
10  
11 171 categories that were easy to answer (no payments, under JPY9,999, JPY10,000–24,999,  
12  
13  
14 172 JPY25,000–49,999, JPY50,000–74,999, JPY75,000–99,999, JPY100,000–124,999,  
15  
16  
17 173 JPY125,000–149,999, JPY150,000–299,999, JPY300,000–499,999, and over  
18  
19  
20 174 JPY500,000). We adjusted the answers by capping the upper limit of the limit amount  
21  
22  
23 175 depending on each care-needs level if the answers were over it. These costs were  
24  
25  
26 176 substituted by a median of each category, and we calculated the weighted average as the  
27  
28 177 following formula:  $\frac{\sum_{i=0}^k(\text{median of category}_i) * n_i}{\sum n}$   
29  
30

31 178 All costs were converted from Japanese yen to US dollars using the purchasing power  
32  
33  
34 179 parity rate in 2016 (¥102 = \$1) provided by the Organization for Economic Cooperation  
35  
36  
37 180 and Development.

### 38 39 40 181 *2.5. Inclusion and exclusion criteria*

41  
42 182 With respondents, we only focused on community settings for people with dementia  
43  
44  
45 183 who lived in their own home. We excluded respondents based on the following criteria:  
46  
47  
48 184 (1) people with dementia who were hospitalized or lived in nursing home, (2) lack of  
49  
50  
51 185 data about out-of-pocket payments for LTC services or care-needs levels, (3)  
52  
53  
54 186 contradictions in relationships between caregivers and people with dementia, and (4)  
55  
56  
57  
58  
59  
60

1  
2  
3  
4  
5  
6 187 contradictions in care time (over 24 hours). When the age difference was less than 15  
7  
8  
9 188 years and the person with dementia was a parent or child (not in-law), these cases were  
10  
11 189 identified as contradictions.

## 14 190 *2.6. Statistical analysis*

17 191 We conducted descriptive analysis for characteristics of people with dementia and  
18  
19  
20 192 caregivers. We then stratified the informal care time and dementia care costs by the  
21  
22  
23 193 care-needs level and cohabitation to test our hypothesis that high care-needs level or  
24  
25  
26 194 people who lives with caregivers need more informal care time. In this description, we  
27  
28 195 didn't adjusted informal care time by caregivers' contribution rate.

31 196 Also, we used chi-square automatic interaction detection (CHAID) analysis to  
32  
33  
34 197 identify the characteristics of people with dementia and caregivers who needed more  
35  
36  
37 198 care services. In CHAID analysis, the dependent variable would be divided into  
38  
39  
40 199 sub-groups by the most explanatory independent variables. These groups could be  
41  
42  
43 200 formed by any possible combination with all independent variables. Especially, we  
44  
45  
46 201 conducted an exhaustive CHAID analysis that repeats the trial until it finds the optimal  
47  
48 202 combination of all independent variables. The CHAID dendograms provide a visual  
49  
50  
51 203 depiction of criteria and predictor variable interactions that might not be detected in  
52  
53  
54 204 traditional analytic procedures. We set informal care costs, out-of-pocket payments for

1  
2  
3  
4  
5  
6 205 LTC services covered by insurance and out-of-pocket payments for LTC services not  
7  
8  
9 206 covered by insurance as dependent variables. Then, we used the characteristics of  
10  
11 207 people with dementia (age, sex, care-need level, dementia types, ADL and IADL  
12  
13  
14 208 functions, and primary disease as the reason for care), the characteristics of caregivers  
15  
16  
17 209 (age, sex, marital status, children, cohabitation with people with dementia, visiting time,  
18  
19  
20 210 relationship to people with dementia, and occupation), and economic factors (the ratio  
21  
22  
23 211 of copayments for healthcare services and family income of caregivers). We treated the  
24  
25  
26 212 ratio of copayments for healthcare services as income proxy variable because this ratio  
27  
28  
29 213 was decided by income of people with dementia. We set the following criteria: tree  
30  
31 214 depth was limited to three levels, no group smaller than 100 was split, no group smaller  
32  
33  
34 215 than 30 was formed, and the p-value for all statistical tests was under 0.05.

35  
36  
37 216 All data were analyzed using IBM SPSS Statistics 23.0 for Windows (SPSS Japan  
38  
39  
40 217 Inc., Tokyo, Japan).

#### 41 42 218 *2.6. Ethical considerations*

43  
44  
45 219 This study was approved by the Ethics committee of Kyoto University Graduate School  
46  
47  
48 220 of Medicine (R0487).

49  
50  
51 221

### 222 3. Results

#### 223 3.1. Characteristics of people with dementia and their caregivers

224 A total of 3,916 caregivers answered the questionnaire. We focused only on people  
225 with dementia who lived in their own home (n=2277). However, we excluded the data  
226 according to the criteria and the final sample comprised 1,383 respondents (Figure 1).

227 Table 1 shows the characteristics of people with dementia and their caregivers. More  
228 than half of the people with dementia were female (66.7%), and the mean age was 81.8  
229 years. In contrast, more than half of the caregivers were male (61.7%), and the mean  
230 age was 52.2 years. 1,233 people (89.2%) responded that ADL functions such as meals  
231 and toilet use could be managed by themselves, while IADL functions such as cleaning  
232 and shopping could be done by one person in the same way. There were only 788  
233 people (57.0%) who did the latter by themselves.

#### 234 3.2. Informal care time and costs of dementia care

235 The mean daily informal care time was 9.36 hours in total. The time for only ADL  
236 was 4.97 hours and for only IADL was 4.39 hours. On the other hand, monthly informal  
237 care time (ADL+IADL) was 166.32 hours. Table 2 shows the differences in daily  
238 informal care time and personal cost of dementia care among the care-need levels. In  
239 this table, we didn't adjust by contribution rate. Informal care times increased with



1  
2  
3  
4  
5  
6 240 care-needs levels, especially in ADL. Out-of-pocket payments for LTC services were  
7  
8  
9 241 less than informal care costs in all of the care-needs levels.

10  
11 242

12  
13 243 *3.3. Classification with classification trees*

14  
15 244 Figure 2 shows the results of CHAID analysis for informal care costs. Informal care  
16  
17  
18 245 costs were related to caregivers' employment status, cohabitation, age, and care-needs  
19  
20  
21 246 levels or ADL function of people with dementia. When the caregiver acquired family  
22  
23  
24 247 care leave, informal care cost was the highest (node 2). Even if the caregiver did not  
25  
26  
27 248 work, informal care costs were higher with high care-needs levels (node 6-8). The costs  
28  
29  
30 249 for cohabiting caregivers (node 5) were higher than for those not cohabiting (node 4).  
31  
32  
33 250 For those not cohabiting and the person with dementia could not walk without  
34  
35  
36 251 assistance (node 9), informal care costs were higher than for those that could walk (node  
37  
38  
39 252 10) .

40  
41 253 Out-of-pocket payments for LTC services covered by insurance were related to  
42  
43  
44 254 care-need levels, ADL or IADL functions, sex (both the people with dementia and  
45  
46  
47 255 caregivers) and caregivers' household incomes (Figure 3). Especially, if the people with  
48  
49  
50 256 dementia could bathe or use the toilet by themselves, out-of-pocket payments would be  
51  
52  
53 257 about 65% lower (nodes 9-10, 15-18). On the other hand, if out-of-pocket payments  
54  
55  
56 258 were not covered by insurance, they were related to caregivers' household incomes,

1  
2  
3  
4  
5  
6 259 income proxy variable, ADL or IADL functions of people with dementia, and age of  
7  
8  
9 260 people with dementia (Figure 4).

10  
11 261

#### 12 13 262 **4. Discussion**

14  
15 263 In this study, we first demonstrated that informal care time for ADL or IADL  
16  
17  
18 264 functions increased with high care-needs levels as our hypothesis stipulated. Second, we  
19  
20  
21 265 found through classification tree analysis that a combination of characteristics of both  
22  
23  
24 266 people with dementia and their caregivers were related to dementia care costs.  
25  
26  
27 267 Caregivers' employment and cohabitation status were mainly related to informal care  
28  
29  
30 268 costs, and the costs were the highest when caregivers took nursing care leave, which  
31  
32  
33 269 caregivers leave work due to caregiving. Furthermore, when caregivers worked at an  
34  
35  
36 270 occupation and lived separately, or the people with dementia could not walk, the costs  
37  
38  
39 271 doubled. Out-of-pocket payments for LTC services covered by insurance were mainly  
40  
41  
42 272 related to care-need levels and ADL and IADL functions. In case where care was  
43  
44  
45 273 needed for toileting or bathing with low care-needs levels, high out-of-pocket payments  
46  
47  
48 274 were required for LTC services covered by insurance. On the other hand, out-of-pocket  
49  
50  
51 275 payments were related to caregivers' household income levels or income proxy variable.  
52  
53  
54 276 Caregivers with high annual incomes (more than \$117,648 US) made out-of-pocket  
55  
56  
57 277 payments for dementia care of full amounts that were two to five times more than

1  
2  
3  
4  
5  
6 278 others.

7  
8 279 Informal care costs were mainly related to caregivers' characteristics such as  
9  
10 280 employment or cohabitation status in the classification tree, which illustrated related  
11  
12 281 factors by order of precedence. In many previous studies, ADL functions or dementia  
13  
14 282 severity were explained as related factors in regression models [9–12]. Some studies  
15  
16 283 showed caregivers' characteristics such as employment status were related to informal  
17  
18 284 care costs [9,27,28], but few studies considered all of the caregivers' characteristics.  
19  
20 285 Thus, caregiver factors may be as important as factors related to people with dementia  
21  
22 286 are.  
23  
24  
25  
26  
27  
28  
29  
30

31 287 Furthermore, we considered the combination of characteristics of both people with  
32  
33 288 dementia and their caregivers. For example, informal care costs doubled when  
34  
35 289 caregivers lived separately and people with dementia could not walk. Also, Figure 1  
36  
37 290 shows the combination of caregivers without employment, care-need levels, and  
38  
39 291 caregivers' cohabitation. CHAID analysis provided the classification only for related  
40  
41 292 characteristics in the outcome. Such combinations suggest that support should be  
42  
43 293 provided to caregivers who cannot live with people with dementia or caregivers who are  
44  
45 294 not employed.  
46  
47  
48  
49  
50  
51  
52

53 295 The association between out-of-pocket payments for LTC services covered by  
54  
55  
56  
57  
58  
59  
60

1  
2  
3  
4  
5  
6 296 insurance and care-need levels is reasonable because the benefit limit standard amounts  
7  
8  
9 297 for formal care services at home are decided in relation to care-need levels. In addition,  
10  
11 298 when people with dementia had a high care-needs level and their caregiver's household  
12  
13  
14 299 income was high, out-of-pocket payments were high. Because the determination of  
15  
16  
17 300 service usage within the limit amount is a free contract, people with dementia and their  
18  
19  
20 301 caregivers may decide how they use formal care services depending on how much they  
21  
22  
23 302 can pay for services. Even for low care-needs levels, the cost may be high when people  
24  
25  
26 303 with dementia need assistance with bathing or toileting. This was affected by LTC  
27  
28  
29 304 insurance services providing specific substitutions, such as bath assistance.

30  
31 305 Similarly, economic variables such as household income and income proxy variable  
32  
33  
34 306 were mainly related to out-of-pocket payments for LTC services not covered by  
35  
36  
37 307 insurance. This is because people must pay the full amount if they use LTC services  
38  
39  
40 308 without insurance. Furthermore, except when caregivers' income was high, the cost did  
41  
42  
43 309 not change significantly due to differences in ADL and IADL functions as it did when  
44  
45  
46 310 covered by insurance. According to the questionnaire responses, people tended to pay  
47  
48  
49 311 for expendables such as diapers, employment of housekeepers, and home repair such as  
50  
51  
52 312 handrail installation as out-of-pocket payments not covered by LTC insurance. These  
53  
54  
55 313 application examples were not really affected by ADL or IADL functions.

1  
2  
3  
4  
5  
6 314 From the viewpoint of independent variables, if people with dementia lacked some  
7  
8 315 ADL function, then costs might be higher but in the case of IADL functions this was  
9  
10  
11 316 reversed. There is a possibility that some services are used to support the independent  
12  
13  
14 317 lives of people with dementia. Some people with dementia who can do housework by  
15  
16  
17 318 themselves might move or walk around more, and therefore use more LTC services like  
18  
19  
20 319 commuting for care (day service) or commuting for rehabilitation. Also, care-need  
21  
22  
23 320 levels were not related to out-of-pocket payments not covered by insurance. The above  
24  
25  
26 321 application examples were also not related to care-needs levels. The relationship of  
27  
28  
29 322 cohabitation or employment status was the same as in previous studies [9,27,29].  
30

31 323 In creating policy for LTC services in an aging society, we must understand the actual  
32  
33  
34 324 conditions from not only a societal but also a personal perspective. This is true even if  
35  
36  
37 325 from a societal viewpoint, the societal cost of dementia care in the community has been  
38  
39  
40 326 established by other countries to be greater than that in institutional care [30].  
41  
42  
43 327 Furthermore, we need a wide range of perspectives of stakeholders to discuss the  
44  
45  
46 328 dementia care system, while almost all studies of economic burden of dementia stood  
47  
48  
49 329 on societal or payers' viewpoint[7,17–19]. Then, as a first step, we need to understand  
50  
51  
52 330 what people with dementia and their family caregivers are already spending too much  
53  
54  
55 331 money on. We need to recognize the complicated combination of characteristics  
56  
57  
58  
59  
60

1  
2  
3  
4  
5  
6 332 associated with people with dementia and their caregivers. To this point, the results of  
7  
8  
9 333 this classification could be useful to understanding which situation requires more  
10  
11 334 resources depending on cost types. Our results may suggest that a sustainable dementia  
12  
13  
14 335 care system in Japan should be reconstructed from a personal viewpoint.  
15  
16

17 336 There are some limitations to this study. First, we conducted a web-based  
18  
19  
20 337 questionnaire survey with caregivers of people with dementia. Traditionally,  
21  
22  
23 338 respondents who use the Internet tend to be male and relatively young, reflecting the  
24  
25  
26 339 general characteristics of web-based research [31,32]. The sample may therefore not be  
27  
28  
29 340 representative of all caregivers because the sample is limited to those who have access  
30  
31  
32 341 to the Internet and are registered with an Internet research company [33]. Certainly, we  
33  
34  
35 342 cannot extrapolate our results to the population as a whole. However, public access to  
36  
37  
38 343 the Internet is common in developed countries these days [34]. Furthermore, this study  
39  
40  
41 344 focused on finding a combination of independent variables related to the dependent  
42  
43  
44 345 variables (informal care cost and financial burden), taking into account the interaction  
45  
46  
47 346 between multiple independent variables. Therefore, in this study, influence due to the  
48  
49  
50 347 difference in sample variable distribution is not considered to be a practical problem.  
51  
52  
53 348 Second, we didn't consider the subjective burden of care and depressive symptoms.  
54  
55  
56 349 These mental burdens are considered to be important factors in explaining the actual  
57  
58  
59  
60

1  
2  
3  
4  
5  
6 350 state of care costs, and many previous studies in Japan have covered subjective costs  
7  
8  
9 351 [35–37]. In the future, in addition to the burden of time and money, it would be  
10  
11 352 preferable to measure subjective burdens.  
12  
13

14 353

## 17 354 **Conclusions**

19  
20 355 This study clarified the difference in dementia care costs between classified  
21  
22  
23 356 subgroups by considering the combination of the situations of both people with  
24  
25 357 dementia and their caregivers. Informal care costs were related to caregivers'  
26  
27  
28 358 employment and cohabitation status rather to the situation of people with dementia. On  
29  
30  
31 359 the other hand, out-of-pocket payments for long-term care services were related to  
32  
33  
34 360 care-needs levels and family economic status. These classifications will be useful in  
35  
36  
37 361 understanding which situation represents a greater economic burden, and helpful in  
38  
39  
40 362 improving the sustainability of the dementia care system in Japan.  
41

42 363

## 45 364 **Footnotes**

### 48 365 *Abbreviations*

50  
51 366 LTC: Long-Term Care

52  
53  
54 367 RUD: Resource Utilization in Dementia  
55  
56  
57  
58  
59  
60

1  
2  
3  
4  
5  
6 368 ADL: Activities of Daily Life  
7

8  
9 369 IADL: Instrumental Activities of Daily Life  
10

11 370 CHAID analysis: chi-square automatic interaction detection analysis  
12  
13

14 371 *Authors' contribution*  
15

16  
17 372 TN, SN and YI designed the study. All authors discussed for preparing the questionnaire.  
18

19  
20 373 TN mainly analyzed all data, and HU, SK, AW and YI advised for analysis. TN  
21

22 374 prepared the draft of the manuscript, then all authors contributed to rewrite it. All  
23

24  
25 375 authors read and approved the final manuscript.  
26  
27

28 376 *Funding sources*  
29

30  
31 377 This study was financially supported by a Health Sciences Research Grant from the  
32

33  
34 378 Ministry of Health, Labour and Welfare of Japan (H27-ninntishou-ippan-001), the Japan  
35

36  
37 379 Foundation for Aging and Health (H27), and a Grant-in-Aid for Scientific Research  
38

39  
40 380 from the Japan Society for the Promotion of Science ([A]16H02634). The funders had  
41

42 381 no role in the study design, data collection and analysis, decision to publish, or  
43

44  
45 382 preparation of the manuscript.  
46  
47

48 383 *Competing interest*  
49

50  
51 384 None declared.  
52  
53  
54  
55  
56  
57  
58  
59  
60



1  
2  
3  
4  
5  
6 385 *Consent for publication*

7  
8  
9 386 Not applicable.

10  
11 387 *Ethics approval and consent to participate*

12  
13  
14 388 This study was approved by the Ethics Committee of Kyoto University Graduate School  
15  
16  
17 389 of Medicine (R0487). All participants were volunteers and they finished to answer the  
18  
19  
20 390 questionnaire as substitution of informed consent.

21  
22 391 *Acknowledgements*

23  
24  
25 392 None.

26  
27  
28 393 *Conflicts of interest*

29  
30  
31 394 None.

32  
33 395 *Data sharing statement*

34  
35  
36 396 No additional data are available.

37  
38  
39 397

## 398 References

- 399 1 Ninomiya T, Kiyohara Y, Obara T, *et al*. A study on future estimation of the  
400 elderly population of dementia in Japan Grant-in-Aid for Scientific Research for  
401 Ministru of Health, Labor and Welfare in 2014( H26-Tokubetsu-Shitei-036).  
402 2014.  
403 <https://mhlw-grants.niph.go.jp/niph/search/NIDD00.do?resrchNum=201405037A>
- 404 2 Prince M, Wimo A, Guerchet M, *et al*. World Alzheimer Report 2015: the global  
405 impact of dementia. 2015.<https://www.alz.co.uk/research/world-report-2015>  
406 (accessed 3 Apr 2016).
- 407 3 Wimo A, Jönsson L, Fratiglioni L, *et al*. The societal costs of dementia in  
408 Sweden 2012 - relevance and methodological challenges in valuing informal care.  
409 *Alzheimers Res Ther* 2016;**8**:59. doi:10.1186/s13195-016-0215-9
- 410 4 Wimo A, Strauss E Von, Nordberg G. Time spent on informal and formal care  
411 giving for persons with dementia in Sweden. *Heal Po* 2002;**61**:255–68.
- 412 5 Wimo A, Prince M. World Alzheimer Report 2010 THE GLOBAL ECONOMIC  
413 IMPACT OF DEMENTIA.  
414 2010.<https://www.alz.co.uk/research/files/WorldAlzheimerReport2010Executive>  
415 Summary.pdf (accessed 3 Apr 2016).
- 416 6 Wimo A, Ali G, Wu Y, *et al*. The worldwide costs of dementia 2015 and

- 1  
2  
3  
4  
5  
6 417 comparisons with 2010. *Alzheimer's Dement* 2016;:1–7.  
7  
8  
9 418 doi:10.1016/j.jalz.2016.07.150  
10  
11 419 7 Jönsson L, Lin P-J, Khachaturian AS. Special topic section on health economics  
12 and public policy of Alzheimer's disease. *Alzheimer's Dement* 2017;13:201–4.  
13  
14 420  
15  
16 421 doi:10.1016/j.jalz.2017.02.004  
17  
18  
19 422 8 Nakabe T, Sasaki N, Uematsu H, *et al.* The personal cost of dementia care in  
20 Japan: A comparative analysis of residence types. *Int J Geriatr Psychiatry*  
21  
22 423  
23 2018;33:1243–52. doi:10.1002/gps.4916  
24  
25 424  
26  
27 425 9 Ku L-JE, Pai M-C, Shih P-Y. Economic Impact of Dementia by Disease  
28 Severity: Exploring the Relationship between Stage of Dementia and Cost of  
29 Care in Taiwan. *PLoS One* 2016;11:e0148779.  
30  
31 426  
32  
33 427  
34  
35 428 doi:10.1371/journal.pone.0148779  
36  
37  
38 429 10 Leicht H, Heinrich S, Heider D, *et al.* Net costs of dementia by disease stage.  
39  
40  
41 430 *Acta Psychiatr Scand* 2011;124:384–95. doi:10.1111/j.1600-0447.2011.01741.x  
42  
43  
44 431 11 Leicht H, König H-H, Stuhldreher N, *et al.* Predictors of Costs in Dementia in a  
45  
46  
47 432  
48  
49 433  
50  
51 434 12 Farré M, Haro JM, Kostov B, *et al.* Direct and indirect costs and resource use in  
52  
53  
54  
55  
56  
57  
58  
59  
60

- 1  
2  
3  
4  
5  
6 435 dementia care: A cross-sectional study in patients living at home. *Int J Nurs Stud*  
7  
8  
9 436 2016;**55**:39–49.  
10  
11 437 13 Ministry of Internal Affairs and Communications. Survey on Time Use and  
12  
13  
14 438 Leisure Activities in 2016. 2017.  
15  
16  
17 439 <http://www.stat.go.jp/data/shakai/2016/pdf/gaiyou2.pdf> (accessed 6 Mar 2018).  
18  
19  
20 440 14 Mesterton J, Wimo A, By A, *et al*. Cross sectional observational study on the  
21  
22  
23 441 societal costs of Alzheimer's disease. *Curr Alzheimer Res* 2010;**7**:358–  
24  
25  
26 442 67.<http://www.ncbi.nlm.nih.gov/pubmed/19939223> (accessed 11 Jun 2018).  
27  
28  
29 443 15 Lin H-R, Otsubo T, Imanaka Y. Survival analysis of increases in care needs  
30  
31  
32 444 associated with dementia and living alone among older long-term care service  
33  
34  
35 445 users in Japan. *BMC Geriatr* 2017;**17**:182. doi:10.1186/s12877-017-0555-8  
36  
37  
38 446 16 Wimo A, Gustavsson A, Jonsson L, *et al*. Application of resource utilization in  
39  
40  
41 447 dementia (RUD) instrument in a global setting. *Alzheimer's Dement* 2013;**9**:429–  
42  
43  
44 448 35. doi:10.1016/j.jalz.2012.06.008  
45  
46  
47 449 17 Mausekopf J, Mucha L. A Review of the Methods Used to Estimate the Cost of  
48  
49  
50 450 Alzheimer's Disease in the United States. *Am J Alzheimer's Dis Other*  
51  
52  
53 451 *Dementias* 2011;**26**:298–309. doi:10.1177/1533317511407481  
54  
55  
56 452 18 Quentin W, Sg R, Luppia M, *et al*. Cost-of-illness studies of dementia : a  
57  
58  
59  
60

- 1  
2  
3  
4  
5  
6 453 systematic review focusing on stage dependency of costs. *Acta Psychiatr Scand*  
7  
8  
9 454 2010;**121**:243–59. doi:10.1111/j.1600-0447.2009.01461.x  
10  
11 455 19 Schaller S, Mauskopf J, Kriza C, *et al.* The main cost drivers in dementia : a  
12  
13  
14 456 systematic review. *Int J Geriatr Psychiatry* 2015;**30**:111–29.  
15  
16  
17 457 doi:10.1002/gps.4198  
18  
19  
20 458 20 Wimo A, Winblad B, Jönsson L. An estimate of the total worldwide societal  
21  
22  
23 459 costs of dementia in 2005. *Alzheimer's Dement* 2007;**3**:81–91.  
24  
25  
26 460 doi:10.1016/j.jalz.2007.02.001  
27  
28  
29 461 21 Johannesson M, Borgquis L, Jönsson B, *et al.* The costs of treating hypertension -  
30  
31 462 an analysis of different cut-off points. *Health Policy (New York)* 1991;**18**:141–50.  
32  
33  
34 463 doi:10.1016/0168-8510(91)90095-F  
35  
36  
37 464 22 Costa N, Ferlicq L, Derumeaux-burel H, *et al.* Comparison of Informal Care  
38  
39 465 Time and Costs in Different Age-Related Dementias : A Review. *Biomed Res Int*  
40  
41  
42 466 2013;**2013**:1–15.  
43  
44  
45 467 23 Åkerborg Ö, Lang A, Wimo A, *et al.* Cost of Dementia and Its Correlation With  
46  
47  
48 468 Dependence. *J Aging Health* Published Online First: 26 January 2016.  
49  
50  
51 469 doi:10.1177/0898264315624899  
52  
53  
54 470 24 Bergvall N, Brinck P, Eek D, *et al.* Relative importance of patient disease  
55  
56  
57  
58  
59  
60

- 1  
2  
3  
4  
5  
6 471 indicators on informal care and caregiver burden in Alzheimer ' s disease. *Int*  
7  
8  
9 472 *Psychogeriatrics* 2011;:73–85. doi:10.1017/S1041610210000785  
10  
11 473 25 Rattinger G, Schwartz S, Mullins C, *et al.* Dementia severity and the longitudinal  
12  
13  
14 474 costs of informal care in the Cache County population. *Alzheimer 's Dement*  
15  
16  
17 475 2015;11:946–54.  
18  
19  
20 476 26 Gustavsson A, Brinck P, Bergvall N, *et al.* Predictors of costs of care in  
21  
22  
23 477 Alzheimer's disease: a multinational sample of 1222 patients. *Alzheimers Dement*  
24  
25  
26 478 2011;7:318–27. doi:10.1016/j.jalz.2010.09.001  
27  
28  
29 479 27 Gervès C, Chauvin P, Bellanger MM. Evaluation of full costs of care for patients  
30  
31 480 with Alzheimer ' s disease in France : The predominant role of informal care.  
32  
33  
34 481 *Health Policy (New York)* 2014;116:114–22. doi:10.1016/j.healthpol.2014.01.001  
35  
36  
37 482 28 Dodel R, Belger M, Reed C, *et al.* Determinants of societal costs in Alzheimer's  
38  
39  
40 483 disease: GERAS study baseline results. *Alzheimers Dement* 2015;11:933–45.  
41  
42  
43 484 doi:10.1016/j.jalz.2015.02.005  
44  
45  
46 485 29 Dodel R, Belger M, Reed C, *et al.* Determinants of societal costs in Alzheimer's  
47  
48  
49 486 disease. *Alzheimer 's Dement* 2015;11:933–45.  
50  
51  
52 487 30 König H, Leicht H, Brettschneider C, *et al.* The Costs of Dementia From the  
53  
54 488 Societal Perspective : Is Care Provided in the Community Really Cheaper than  
55  
56  
57  
58  
59  
60

- 1  
2  
3  
4  
5  
6 489 Nursing Home Care? *JAMDA* 2014;**15**:117–26.  
7  
8  
9 490 doi:10.1016/j.jamda.2013.10.003  
10  
11 491 31 Eysenbach G. Improving the quality of Web surveys: the Checklist for Reporting  
12  
13  
14 492 Results of Internet E-Surveys (CHERRIES). *J Med Internet Res* 2004;**6**:e34.  
15  
16  
17 493 doi:10.2196/jmir.6.3.e34  
18  
19  
20 494 32 Eysenbach G, Wyatt J. Using the Internet for Surveys and Health Research. *J*  
21  
22  
23 495 *Med Internet Res* 2002;**4**:e13. doi:10.2196/jmir.4.2.e13  
24  
25  
26 496 33 van Gelder MMHJ, Bretveld RW, Roeleveld N. Web-based Questionnaires: The  
27  
28  
29 497 Future in Epidemiology? *Am J Epidemiol* 2010;**172**:1292–8.  
30  
31 498 doi:10.1093/aje/kwq291  
32  
33  
34 499 34 Ebert JF, Huibers L, Christensen B, *et al.* Paper- or Web-Based Questionnaire  
35  
36  
37 500 Invitations as a Method for Data Collection: Cross-Sectional Comparative Study  
38  
39  
40 501 of Differences in Response Rate, Completeness of Data, and Financial Cost. *J*  
41  
42  
43 502 *Med Internet Res* 2018;**20**:e24. doi:10.2196/jmir.8353  
44  
45  
46 503 35 Washio S, Toyoshima Y, Yamazaki R, *et al.* [Factors related to the care burden  
47  
48  
49 504 of family caregivers - focusing on the care burden of caregivers of elderly who  
50  
51 505 needs nursing care -]. *Japanese J Clin Exp Med = Rinshou to Kenkyuu*  
52  
53  
54 506 2012;**89**:1687–91.  
55  
56  
57  
58  
59  
60

- 1  
2  
3  
4  
5  
6 507 36 Arai Y, Kumamoto K, Mizuno Y, *et al.* Depression among family caregivers of  
7  
8  
9 508 community-dwelling older people who used services under the Long Term Care  
10  
11 509 Insurance program: a large-scale population-based study in Japan. *Aging Ment*  
12  
13  
14 510 *Health* 2014;**18**:81–91. doi:10.1080/13607863.2013.787045  
15  
16  
17 511 37 Washio S, Nogami Y, Motoyama S, *et al.* [Long-Term Care Insurance Act  
18  
19  
20 512 amendment and care burden of family caregivers for elderly who need long-term  
21  
22  
23 513 care at home]. *Japanese J Clin Exp Med = Rinshou to Kenkyuu* 2015;**92**:75–9.  
24  
25  
26 514  
27  
28  
29  
30  
31  
32  
33  
34  
35  
36  
37  
38  
39  
40  
41  
42  
43  
44  
45  
46  
47  
48  
49  
50  
51  
52  
53  
54  
55  
56  
57  
58  
59  
60



1  
2  
3  
4  
5  
6 **Figure 1: Selection process for the analysis**  
7

8 This diagram shows the flow of participants who we focused on.  
9

10  
11 **Figure 2: Classification tree of chi-square automatic interaction detection for**  
12 **informal care costs**  
13  
14

15 The dendogram illustrates the combinations of independent variables to clarify who  
16 need or provide more informal care.  
17  
18

19 Abbreviations: ADL, Activities of Daily Living; IADL, Instrumental Activities of Daily  
20 Living; SD, Standard deviation; LTC, Long-term care  
21  
22

23  
24  
25  
26  
27  
28 **Figure 3: Classification tree of chi-square automatic interaction detection for**  
29 **out-of-pocket payments for LTC services covered by insurance**  
30  
31

32 The dendogram illustrates the combinations of independent variables to clarify who  
33 need more LTC insurance services.  
34  
35

36 Abbreviations: ADL, Activities of Daily Living; IADL, Instrumental Activities of Daily  
37 Living; SD, Standard deviation; LTC, Long-term care  
38  
39

40  
41  
42  
43  
44  
45 **Figure 4: Classification tree of chi-square automatic interaction detection for**  
46 **out-of-pocket payments for LTC services not covered by insurance**  
47  
48

49 The dendogram illustrates the combinations of independent variables to clarify who  
50 need more LTC services without insurance.  
51  
52  
53  
54

1  
2  
3  
4  
5  
6 Abbreviations: ADL, Activities of Daily Living; IADL, Instrumental Activities of Daily  
7

8 Living; SD, Standard deviation; LTC, Long-term care  
9  
10  
11  
12  
13  
14  
15  
16  
17  
18  
19  
20  
21  
22  
23  
24  
25  
26  
27  
28  
29  
30  
31  
32  
33  
34  
35  
36  
37  
38  
39  
40  
41  
42  
43  
44  
45  
46  
47  
48  
49  
50  
51  
52  
53  
54  
55  
56  
57  
58  
59  
60

For peer review only

**Table 1 Characteristics of people with dementia and caregivers**

| <b>People with Dementia</b>                       |                                | N=1383     |
|---------------------------------------------------|--------------------------------|------------|
| Age, mean±SD, y                                   |                                |            |
| Sex, n (%)                                        |                                |            |
|                                                   | Female                         | 922 (66.7) |
|                                                   | Male                           | 461 (33.3) |
| Care-needs level, n (%)                           |                                |            |
|                                                   | Support-Needs Level 1-2        | 253 (18.3) |
|                                                   | Care-Needs Level 1             | 310 (22.4) |
|                                                   | Care-Needs Level 2             | 335 (24.2) |
|                                                   | Care-Needs Level 3             | 258 (18.7) |
|                                                   | Care-Needs Level 4             | 122 (8.8)  |
|                                                   | Care-Needs Level 5             | 105 (7.6)  |
| ADL/IADL functional capabilities                  |                                |            |
|                                                   | ADL score (0-6), mean          | 3.2 (2.0)  |
|                                                   | IADL score (0-7), mean         | 1.3 (1.6)  |
| Ratio of copayments for healthcare services, n(%) |                                |            |
|                                                   | 10%                            | 961 (69.5) |
|                                                   | 20%                            | 137 (9.9)  |
|                                                   | 30%                            | 157 (11.4) |
|                                                   | Unknown                        | 128 (9.3)  |
| <b>Caregivers</b>                                 |                                |            |
| Age, mean ± SD                                    |                                |            |
| Sex, n (%)                                        |                                |            |
|                                                   | Female                         | 530 (38.3) |
|                                                   | Male                           | 853 (61.7) |
| Relationship, n (%)                               |                                |            |
|                                                   | Mother                         | 575 (41.6) |
|                                                   | Mother-in-law                  | 169 (12.2) |
|                                                   | Father                         | 288 (20.8) |
|                                                   | Father-in-law                  | 90 (6.5)   |
|                                                   | Spouse                         | 99 (7.2)   |
|                                                   | Sibling                        | 11 (0.8)   |
|                                                   | Child                          | 10 (0.7)   |
|                                                   | Friend                         | 5 (0.4)    |
|                                                   | Other (including grandparents) | 136 (9.8)  |
| Contribution level for caregiving, n (%)          |                                |            |
|                                                   | 1-20%                          | 395 (28.6) |
|                                                   | 21-40%                         | 355 (25.7) |
|                                                   | 41-60%                         | 241 (17.4) |
|                                                   | 61-80%                         | 166 (12.0) |
|                                                   | 81-100%                        | 226 (16.3) |
| Currently employed, n (%)                         |                                |            |

SD: Standard deviation, ADL: Activities of Daily Living, IADL: Instrumental Activities

of Daily Living

1 **Table 2 Daily informal care time and personal costs of dementia care sorted by care-needs levels**

|                                       |                                                |              | Support-required level | Care-need level 1 | Care-need level 2 | Care-need level 3 | Care-need level 4 | Care-need level 5 |
|---------------------------------------|------------------------------------------------|--------------|------------------------|-------------------|-------------------|-------------------|-------------------|-------------------|
| Informal care time (hours/day)        | ADL                                            | Mean [SD]    | 2.56 [3.23]            | 2.23 [2.54]       | 2.92 [2.90]       | 3.44 [2.90]       | 3.99 [2.40]       | 4.60 [3.85]       |
|                                       |                                                | Median [IQR] | 1.67 [2.00]            | 1.50 [2.50]       | 2.00 [3.00]       | 3.00 [3.50]       | 4.00 [3.00]       | 3.33 [4.00]       |
|                                       | IADL                                           | Mean [SD]    | 2.35 [2.62]            | 2.46 [3.05]       | 2.88 [3.26]       | 2.82 [2.92]       | 3.03 [2.59]       | 3.45 [3.77]       |
|                                       |                                                | Median [IQR] | 2.00 [2.00]            | 1.50 [2.00]       | 2.00 [2.00]       | 2.00 [2.50]       | 2.00 [3.13]       | 2.00 [4.00]       |
| Personal cost of dementia care (US\$) | Informal care cost                             | Mean [SD]    | 1518 [2017]            | 1271 [1526]       | 1754 [1982]       | 2181 [2220]       | 2112 [2104]       | 2672 [2314]       |
|                                       |                                                | Median [IQR] | 747 [1646]             | 709 [1440]        | 1090 [1697]       | 1366 [2459]       | 1535 [1466]       | 1939 [2240]       |
|                                       | OPP for LTC services covered by insurance      | Mean [SD]    | 148 [190]              | 158 [174]         | 244 [209]         | 313 [217]         | 301 [202]         | 318 [218]         |
|                                       |                                                | Median [IQR] | 49 [172]               | 49 [123]          | 172 [319]         | 368 [441]         | 368 [196]         | 368 [441]         |
|                                       | OPP for care services not covered by insurance | Mean [SD]    | 158 [336]              | 95 [156]          | 278 [695]         | 303 [543]         | 241 [579]         | 352 [998]         |
|                                       |                                                | Median [IQR] | 49 [172]               | 49 [172]          | 49 [368]          | 172 [319]         | 49 [368]          | 49 [368]          |

2 ADL: Activities of Daily Living, IADL: Instrumental Activities of Daily Living, SD: Standard deviation, IQR: Interquartile range

3 OPP: Out-of-pocket payments LTC: Long-term care

Figure 1

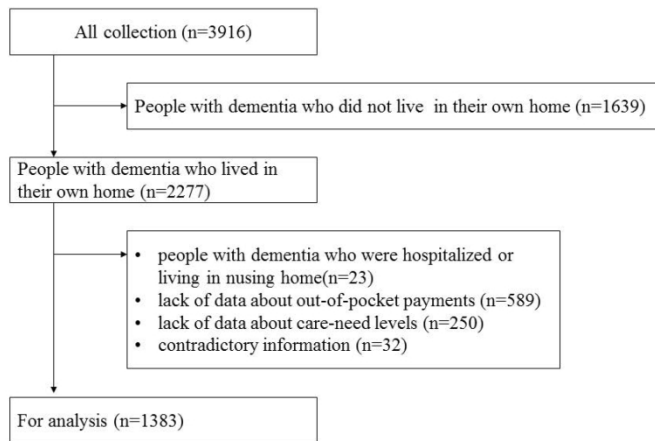

Figure 1: Selection process for the analysis  
This diagram shows the flow of participants who we focused on.

338x190mm (300 x 300 DPI)

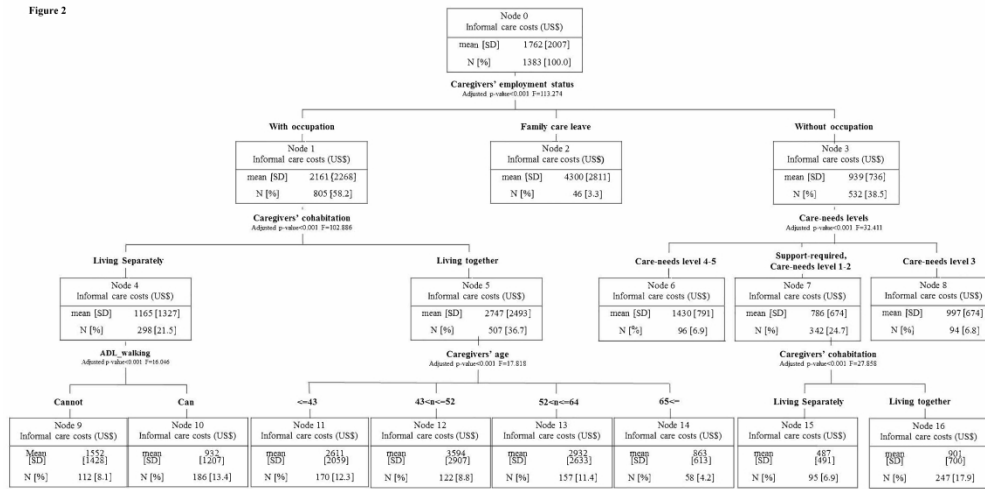

Figure 2: Classification tree of chi-square automatic interaction detection for informal care costs  
 The dendrogram illustrates the combinations of independent variables to clarify who need or provide more informal care.

Abbreviations: ADL, Activities of Daily Living; IADL, Instrumental Activities of Daily Living; SD, Standard deviation; LTC, Long-term care

600x300mm (300 x 300 DPI)

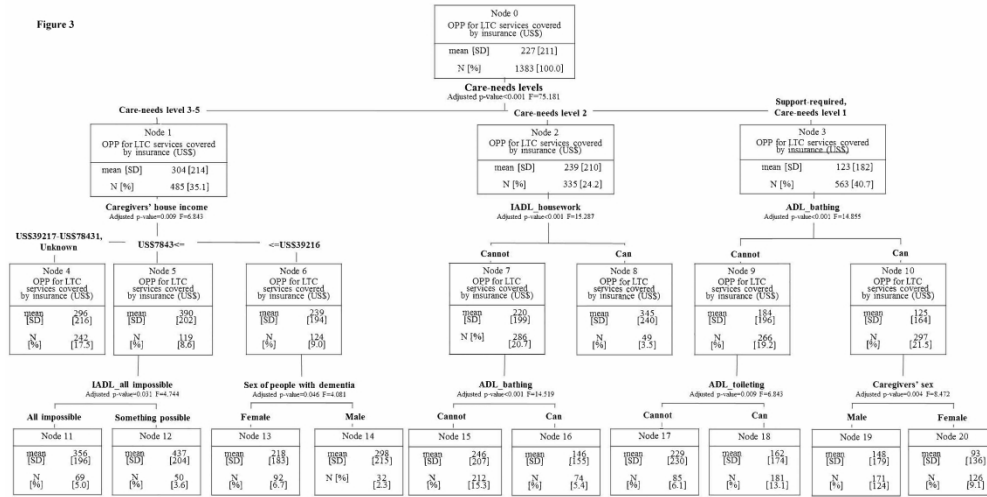

Figure 3: Classification tree of chi-square automatic interaction detection for out-of-pocket payments for LTC services covered by insurance  
 The dendrogram illustrates the combinations of independent variables to clarify who need more LTC insurance services.  
 Abbreviations: ADL, Activities of Daily Living; IADL, Instrumental Activities of Daily Living; SD, Standard deviation; LTC, Long-term care

600x300mm (300 x 300 DPI)

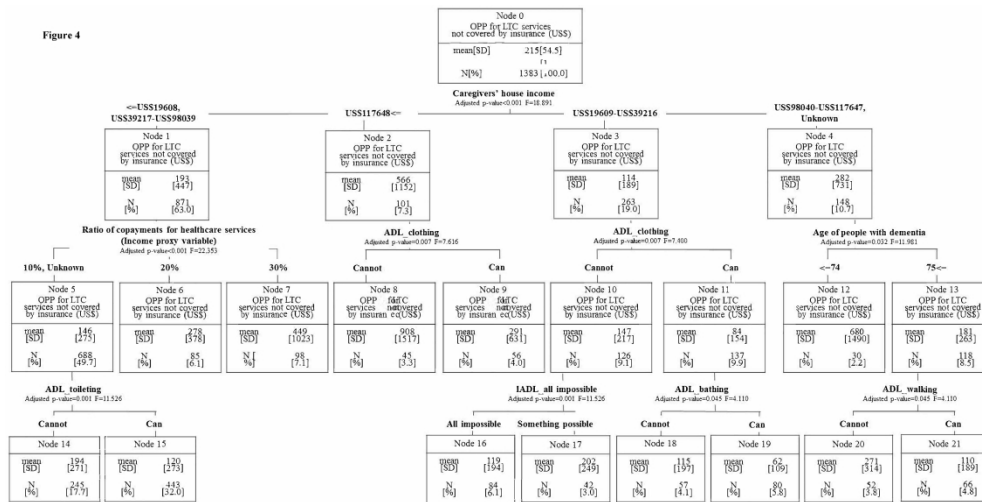

Figure 4: Classification tree of chi-square automatic interaction detection for out-of-pocket payments for LTC services not covered by insurance  
The dendrogram illustrates the combinations of independent variables to clarify who need more LTC services without insurance.  
Abbreviations: ADL, Activities of Daily Living; IADL, Instrumental Activities of Daily Living; SD, Standard deviation; LTC, Long-term care

600x300mm (300 x 300 DPI)



STROBE Statement—Checklist of items that should be included in reports of *cross-sectional studies*

|                              | Item No | Recommendation                                                                                                                                                                                                                                                                                                                                                                                        |
|------------------------------|---------|-------------------------------------------------------------------------------------------------------------------------------------------------------------------------------------------------------------------------------------------------------------------------------------------------------------------------------------------------------------------------------------------------------|
| <b>Title and abstract</b>    | 1       | (a) Indicate the study's design with a commonly used term in the title or the abstract - p.1-2<br>(b) Provide in the abstract an informative and balanced summary of what was done and what was found – p.2-3                                                                                                                                                                                         |
| <b>Introduction</b>          |         |                                                                                                                                                                                                                                                                                                                                                                                                       |
| Background/rationale         | 2       | Explain the scientific background and rationale for the investigation being reported – p.4-5                                                                                                                                                                                                                                                                                                          |
| Objectives                   | 3       | State specific objectives, including any prespecified hypotheses – p.5                                                                                                                                                                                                                                                                                                                                |
| <b>Methods</b>               |         |                                                                                                                                                                                                                                                                                                                                                                                                       |
| Study design                 | 4       | Present key elements of study design early in the paper – p.5                                                                                                                                                                                                                                                                                                                                         |
| Setting                      | 5       | Describe the setting, locations, and relevant dates, including periods of recruitment, exposure, follow-up, and data collection – p.6                                                                                                                                                                                                                                                                 |
| Participants                 | 6       | (a) Give the eligibility criteria, and the sources and methods of selection of participants – p.6 and p.10                                                                                                                                                                                                                                                                                            |
| Variables                    | 7       | Clearly define all outcomes, exposures, predictors, potential confounders, and effect modifiers. Give diagnostic criteria, if applicable – p.6-10                                                                                                                                                                                                                                                     |
| Data sources/<br>measurement | 8*      | For each variable of interest, give sources of data and details of methods of assessment (measurement). Describe comparability of assessment methods if there is more than one group – p.6, 9                                                                                                                                                                                                         |
| Bias                         | 9       | Describe any efforts to address potential sources of bias – p.18-19                                                                                                                                                                                                                                                                                                                                   |
| Study size                   | 10      | Explain how the study size was arrived at – p.6                                                                                                                                                                                                                                                                                                                                                       |
| Quantitative variables       | 11      | Explain how quantitative variables were handled in the analyses. If applicable, describe which groupings were chosen and why – p.11-12                                                                                                                                                                                                                                                                |
| Statistical methods          | 12      | (a) Describe all statistical methods, including those used to control for confounding – p.11-12<br>(b) Describe any methods used to examine subgroups and interactions – p.11-12<br>(c) Explain how missing data were addressed-p.10<br>(d) If applicable, describe analytical methods taking account of sampling strategy – Non applicable<br>(e) Describe any sensitivity analyses – Non applicable |
| <b>Results</b>               |         |                                                                                                                                                                                                                                                                                                                                                                                                       |
| Participants                 | 13*     | (a) Report numbers of individuals at each stage of study—eg numbers potentially eligible, examined for eligibility, confirmed eligible, included in the study, completing follow-up, and analysed – p.12-13<br>(b) Give reasons for non-participation at each stage – Non applicable<br>(c) Consider use of a flow diagram - Figure 1                                                                 |
| Descriptive data             | 14*     | (a) Give characteristics of study participants (eg demographic, clinical, social) and information on exposures and potential confounders – p.13 and Table 1<br>(b) Indicate number of participants with missing data for each variable of interest – Non applicable                                                                                                                                   |
| Outcome data                 | 15*     | Report numbers of outcome events or summary measures – Table 2                                                                                                                                                                                                                                                                                                                                        |
| Main results                 | 16      | (a) Give unadjusted estimates and, if applicable, confounder-adjusted estimates and their precision (eg, 95% confidence interval). Make clear which confounders were adjusted for and why they were included –p.12-13                                                                                                                                                                                 |

|                          |    |                                                                                                                                                                                      |
|--------------------------|----|--------------------------------------------------------------------------------------------------------------------------------------------------------------------------------------|
|                          |    | (b) Report category boundaries when continuous variables were categorized – Non applicable                                                                                           |
|                          |    | (c) If relevant, consider translating estimates of relative risk into absolute risk for a meaningful time period – Non applicable                                                    |
| Other analyses           | 17 | Report other analyses done—eg analyses of subgroups and interactions, and sensitivity analyses – p.13, Figure2-4                                                                     |
| <b>Discussion</b>        |    |                                                                                                                                                                                      |
| Key results              | 18 | Summarise key results with reference to study objectives - p,14-15                                                                                                                   |
| Limitations              | 19 | Discuss limitations of the study, taking into account sources of potential bias or imprecision. Discuss both direction and magnitude of any potential bias – p.18-19                 |
| Interpretation           | 20 | Give a cautious overall interpretation of results considering objectives, limitations, multiplicity of analyses, results from similar studies, and other relevant evidence – p.15-18 |
| Generalisability         | 21 | Discuss the generalisability (external validity) of the study results –p.18-19                                                                                                       |
| <b>Other information</b> |    |                                                                                                                                                                                      |
| Funding                  | 22 | Give the source of funding and the role of the funders for the present study and, if applicable, for the original study on which the present article is based - p.21                 |

\*Give information separately for exposed and unexposed groups.

**Note:** An Explanation and Elaboration article discusses each checklist item and gives methodological background and published examples of transparent reporting. The STROBE checklist is best used in conjunction with this article (freely available on the Web sites of PLoS Medicine at <http://www.plosmedicine.org/>, Annals of Internal Medicine at <http://www.annals.org/>, and Epidemiology at <http://www.epidem.com/>). Information on the STROBE Initiative is available at [www.strobe-statement.org](http://www.strobe-statement.org).

# BMJ Open

## Classification tree model of the personal economic burden of dementia care by related factors of both people with dementia and caregivers in Japan: A cross-sectional online survey

|                                 |                                                                                                                                                                                                                                                                                                                                                                                                                                                                                                                                                                                                                                                                                                                                |
|---------------------------------|--------------------------------------------------------------------------------------------------------------------------------------------------------------------------------------------------------------------------------------------------------------------------------------------------------------------------------------------------------------------------------------------------------------------------------------------------------------------------------------------------------------------------------------------------------------------------------------------------------------------------------------------------------------------------------------------------------------------------------|
| Journal:                        | <i>BMJ Open</i>                                                                                                                                                                                                                                                                                                                                                                                                                                                                                                                                                                                                                                                                                                                |
| Manuscript ID                   | bmjopen-2018-026733.R1                                                                                                                                                                                                                                                                                                                                                                                                                                                                                                                                                                                                                                                                                                         |
| Article Type:                   | Research                                                                                                                                                                                                                                                                                                                                                                                                                                                                                                                                                                                                                                                                                                                       |
| Date Submitted by the Author:   | 26-Feb-2019                                                                                                                                                                                                                                                                                                                                                                                                                                                                                                                                                                                                                                                                                                                    |
| Complete List of Authors:       | Nakabe, Takayo; Kyoto University Graduate School of Medicine, Department of Healthcare Economics and Quality Management<br>Sasaki, Noriko; Kyoto University Graduate School of Medicine, Department of Healthcare Economics and Quality Management<br>Uematsu, Hironori; Kyoto University Graduate School of Medicine, Department of Healthcare Economics and Quality Management<br>Kunisawa, Susumu; Kyoto University Graduate School of Medicine, Department of Healthcare Economics and Quality Management<br>Wimo, Anders; Karolinska Institute, KI Alzheimer's Disease Research Center (ADRC)<br>Imanaka, Yuichi; Kyoto University Graduate School of Medicine, Department of Healthcare Economics and Quality Management |
| <b>Primary Subject Heading</b>: | Public health                                                                                                                                                                                                                                                                                                                                                                                                                                                                                                                                                                                                                                                                                                                  |
| Secondary Subject Heading:      | Health economics                                                                                                                                                                                                                                                                                                                                                                                                                                                                                                                                                                                                                                                                                                               |
| Keywords:                       | Informal care, RUD, Cost, Classification, Japan                                                                                                                                                                                                                                                                                                                                                                                                                                                                                                                                                                                                                                                                                |
|                                 |                                                                                                                                                                                                                                                                                                                                                                                                                                                                                                                                                                                                                                                                                                                                |

SCHOLARONE™  
Manuscripts

1  
2  
3  
4  
5  
6  
7 1 Classification tree model of the personal economic burden of  
8  
9 2 dementia care by related factors of both people with dementia and  
10  
11  
12 3 caregivers in Japan: A cross-sectional online survey  
13  
14  
15  
16 4

17  
18 5 Takayo Nakabe<sup>a</sup>, Noriko Sasaki<sup>a</sup>, Hironori Uematsu<sup>a</sup>, Susumu Kunisawa<sup>a</sup>, Anders Wimo<sup>b</sup>,  
19  
20  
21 6 Yuichi Imanaka<sup>a</sup>

22  
23  
24 7 <sup>a</sup> Department of Healthcare Economics and Quality Management, Graduate School of  
25  
26  
27 8 Medicine, Kyoto University, Yoshida Konoe-cho, Sakyo-ku, Kyoto, Japan.

28  
29  
30 9 <sup>b</sup> Aging Research Centre, Department of Neurobiology, Care Sciences and Society (NVS),  
31  
32  
33 10 Karolinska Institutet and Stockholm University, Stockholm, Sweden

34  
35  
36 11 Corresponding author:

37  
38  
39 12 Yuichi Imanaka, Professor

40  
41  
42 13 Department of Healthcare Economics and Quality Management,

43  
44  
45 14 Graduate School of Medicine, Kyoto University

46  
47  
48 15 Yoshida Konoe-cho, Sakyo-ku, Kyoto 606-8501, Japan

49  
50  
51 16 E-mail: imanaka-y@umin.net

52  
53  
54 17 Tel: +81-75-753-4454 Fax: +81-75-753-4455

55  
56  
57 18 Word counts: 3750 words  
58  
59  
60

1  
2  
3  
4  
5  
6 19 **Abstract**

7  
8 20 **Objective:**

9  
10  
11 21 The purpose of this study was to clarify the micro-level determinants of the economic  
12  
13  
14 22 burden of dementia care at home in Japanese community settings by classifying them into  
15  
16  
17 23 subgroups of factors related to people with dementia and their caregivers.

18  
19  
20 24 **Methods**

21  
22  
23 25 A cross-sectional online survey was conducted from March 7 to March 14, 2016. For the  
24  
25  
26 26 calculation of informal care costs, the average wage stratified by sex and age group was  
27  
28  
29 27 used as the opportunity cost. We conducted a chi-square automatic interaction detection  
30  
31  
32 28 analysis to identify the factors related to each cost divided into sub categories.

33  
34  
35 29 **Results**

36  
37  
38 30 From 4313 respondents, only 1383 caregivers in community-settings were included in  
39  
40  
41 31 this analysis. In the resultant classifications, informal care cost was mainly related to  
42  
43  
44 32 caregivers' employment status. When caregivers acquired family care leave, informal  
45  
46  
47 33 care costs were the highest. On the other hand, out-of-pocket payments for long-term care  
48  
49  
50 34 were related to care-need levels and family economic status. ADL and IADL functions  
51  
52  
53 35 such as bathing, toileting, and cleaning were related to all costs.

54  
55  
56 36 **Conclusion**

1  
2  
3  
4  
5  
6 37 This study clarified the difference in dementia care costs between classified subgroups  
7  
8  
9 38 by considering the combination of the situations of both people with dementia and their  
10  
11  
12 39 caregivers. Informal care costs were related to caregivers' employment and cohabitation  
13  
14  
15 40 status rather to the situations of people with dementia. On the other hand, out-of-pocket  
16  
17  
18 41 payments for long-term care services were related to care-need levels and family  
19  
20  
21 42 economic status. These classifications will be useful in understanding which situation  
22  
23  
24 43 represents a greater economic burden, and helpful in improving the sustainability of the  
25  
26  
27 44 dementia care system in Japan.  
28

29  
30 45  
31  
32  
33  
34  
35  
36  
37  
38  
39  
40  
41  
42  
43  
44  
45  
46  
47  
48  
49  
50  
51  
52  
53  
54  
55  
56  
57  
58  
59  
60

review only

1  
2  
3  
4  
5  
6  
7  
8  
9  
10  
11  
12  
13  
14  
15  
16  
17  
18  
19  
20  
21  
22  
23  
24  
25  
26  
27  
28  
29  
30  
31  
32  
33  
34  
35  
36  
37  
38  
39  
40  
41  
42  
43  
44  
45  
46  
47  
48  
49  
50  
51  
52  
53  
54  
55  
56  
57  
58  
59  
60

## 46 **Strengths and limitations of this study**

47 ● This study clarified the difference in dementia care costs between classified  
48 subgroups by considering the combination of the situations of both people with  
49 dementia and their caregivers.

50 ● The chi-square automatic interaction detection dendograms provide a visual  
51 depiction of criteria and predictor variable interactions that might not be detected in  
52 traditional analytic procedures.

53 ● The sample may therefore not be representative of all caregivers because the sample  
54 is limited to those who have access to the Internet and are registered with an Internet  
55 research company.

56 ● We only assessed objective burden of dementia care such as informal care time or  
57 costs, then we didn't consider the subjective burden of care and depressive symptoms.

58

## 1. Introduction

In the aging society of Japan, it is estimated that there are approximately 4.7 million people living with dementia and that there will be approximately 7 million people with dementia in 2025 [1]. Given that it is also estimated that the total number of people with dementia throughout the world will double every 20 years [2], we need to reconsider how to prepare for dementia care in the community.

Long-term care (LTC) services in Japan used by people with dementia in home care can be classified into three main types: (1) LTC insurance services, (2) LTC services not covered by insurance, and (3) informal care as mutual assistance by family members.

When a person with dementia uses the LTC insurance service, the user bears 10% or 20% of the service expenses as out-of-pocket payments depending on the person's income (Article 49-2 of the Long-Term Care Insurance Act). Aside from such copayments, when LTC services not covered by insurance or exceeding the LTC insurance limit amount are used, people must pay the full amount. Furthermore, it has been pointed out that informal care is an important component of home care, yet it places a burden on caregivers [3,4]. Nevertheless, given the estimates of the societal costs of dementia care throughout the world, the impact of informal care is essential [5,6].

The Japanese government recommends policies to shift to patient-centered and home-centered care to reduce the fiscal burden of the insurance system on community-based



1  
2  
3  
4  
5  
6 78 integrated systems. While micro level of impact of dementia care has not been  
7  
8  
9 79 insufficiently understood[7], to construct a sustainable dementia care system, we clarified  
10  
11  
12 80 the personal economic burden of dementia care for different residence types and  
13  
14  
15 81 demonstrated that the cost at home in a community setting was equal to or higher than in  
16  
17  
18 82 various institutions[8]. Sustainable dementia care systems should be provided not only to  
19  
20  
21 83 benefit the government or insurance system but also to benefit people with dementia and  
22  
23  
24 84 their caregivers. Furthermore, although there are increasing dementia care costs related  
25  
26  
27 85 to the severity of dementia [9–12], it can be seen that the cost of dementia care increases  
28  
29  
30 86 through the interaction of characteristics or situations of people with dementia and their  
31  
32  
33 87 caregivers. Given this interaction, it is necessary to understand the actual conditions by  
34  
35  
36 88 classifying cases where the greatest economic burdens in dementia care are felt.

37  
38  
39 89 Therefore, the purpose of this study is to clarify the micro-level determinants of the  
40  
41  
42 90 economic burden of dementia care at home in community settings by classifying them  
43  
44  
45 91 into subgroups of factors related to people with dementia and their caregivers.

46  
47  
48 92

## 49 93 **2. Methods**

50  
51  
52 94 This study was a cross-sectional study, based on a self-rated, online questionnaire  
53  
54  
55 95 survey. The economic burden of dementia care in this study is roughly divided into  
56  
57  
58 96 informal care costs as opportunity costs and out-of-pocket payments that people actually  
59  
60

1  
2  
3  
4  
5  
6 97 made.

7  
8  
9 98 *2.1. Online survey for data collection on people with dementia and their caregivers*

10  
11  
12 99 In this cross-sectional study, we conducted an online questionnaire survey from March  
13  
14  
15 100 3 to March 14, 2016 in cooperation with a commercial research company (Automatic  
16  
17  
18 101 Internet Research System, Macromill, Inc., Japan). Potential participants fulfilled the  
19  
20  
21 102 following criteria: (1) aged 30 years or older, (2) non-professional caregiver of someone  
22  
23  
24 103 with dementia, (3) caring for only one person with dementia, and (4) having no conflicts  
25  
26  
27 104 of interest with advertising or marketing research entities. A total of 3,600 participants  
28  
29  
30 105 were recruited from the research company's registrants and divided into different age  
31  
32  
33 106 groups (850 participants each in the groups aged in 30's, 40's, 50's, and 60's; 200  
34  
35  
36 107 participants in the group aged  $\geq 70$  years). We excluded caregivers under 29 years of age  
37  
38  
39 108 because, in Japan, they are estimated to represent only 2% of all caregivers [13].

40  
41  
42 109 *2.2. Questionnaire*

43  
44  
45 110 Resource Utilization in Dementia (RUD) [14,15] is a widely used tool to collect data  
46  
47  
48 111 about resource use in persons with dementia and their caregivers [15]. RUD is available  
49  
50  
51 112 in more than 60 languages and it is widely used throughout the world. In this study, we  
52  
53  
54 113 used RUD (Japanese version) items related to the characteristics of people with dementia  
55  
56  
57 114 and their caregivers, informal care time, employed situation of caregivers, residential  
58  
59  
60

1  
2  
3  
4  
5  
6 115 types of people with dementia, and resource use of nursing care services. We added items  
7  
8  
9 116 related to LTC services and residential types. The questionnaire components were divided  
10  
11  
12 117 into four categories: (1) characteristics of people with dementia, (2) caregivers' situations  
13  
14  
15 118 (e.g., employment and cohabitation status), (3) informal care duration and (4) frequency  
16  
17  
18 119 of utilization of LTC services.

20  
21 120 In this project, we could not get information about severity of dementia data because it  
22  
23  
24 121 was regarded as too difficult for caregivers to estimate that. However, we asked for  
25  
26  
27 122 substantial information about care-needs levels. Care needs reflect function, which is a  
28  
29  
30 123 stronger explanatory factor for costs than cognition [16]. Care-needs levels (Support-  
31  
32  
33 124 needs levels 1-2, Care-needs levels 1-5) determine whether a person is qualified to apply  
34  
35  
36 125 for LTC insurance (Article 27 and 32 of the Long-Term Care Insurance Act). Once an  
37  
38  
39 126 insured person applies to use any LTC service, their mental and physical status is first be  
40  
41  
42 127 assessed by certified researchers using a basic checklist. Based on this checklist, care-  
43  
44  
45 128 need times are estimated using an evidence-based computer algorithm. This algorithm  
46  
47  
48 129 was created from the data on how much LTC services were required in 48 hours for more  
49  
50  
51 130 than 3,000 elderly people as a one-minute time study [17]. After estimating the care-needs  
52  
53  
54 131 time, care-needs levels were determined by an expert panel to indicate the amount of care  
55  
56  
57 132 required by each person while taking into consideration their symptoms and functional  
58  
59  
60

1  
2  
3  
4  
5  
6 133 capability. High care-needs levels indicate increasing dependency and requirement for  
7  
8  
9 134 LTC services [18]. Care-need levels also affect the base amount of the maximum payment  
10  
11  
12 135 for LTC services allowance categories covered by insurance.  
13  
14

### 15 136 *2.3. Informal care time*

17  
18 137 In the questionnaire, informal care time was divided in three domains; support for  
19  
20  
21 138 Activities of Daily Living (ADL), Instrumental Activities of Daily Living (IADL) and  
22  
23  
24 139 Supervision [15]. We asked for the mean caregiving time per day and mean caregiving  
25  
26  
27 140 days per week in the past 30 days. We then multiplied the mean daily caregiving time and  
28  
29  
30 141 caregiving days per week to calculate both weekly and monthly informal care time.  
31  
32  
33 142 Supervision time was excluded in calculating informal care time and costs because  
34  
35  
36 143 supervision could be done simultaneously when caregiving for ADL and IADL functions,  
37  
38  
39 144 or in other housekeeping for people without dementia and other family members.  
40  
41

### 42 145 *2.4. Cost estimation*

43  
44  
45 146 In this study, we identified three costs as follows: informal care costs, out-of-pocket  
46  
47  
48 147 payments for LTC services covered by insurance (copayments), and out-of-pocket  
49  
50  
51 148 payments for LTC services not covered by insurance. To calculate the informal care costs,  
52  
53  
54 149 there are two methods that are frequently used: the “opportunity cost” and “replacement  
55  
56  
57 150 cost” approaches [19–21]. With the opportunity cost approach it is assumed that there is  
58  
59  
60

1  
2  
3  
4  
5  
6 151 an alternative use of caregiving time (such as paid work) and thus estimates the costs due  
7  
8  
9 152 to this lost opportunity, whereas the replacement cost approach assumes that informal  
10  
11  
12 153 care services can be valued similarly to home care services provided by professional  
13  
14  
15 154 caregivers. Even though many previous studies on the economic valuation of informal  
16  
17  
18 155 care have used the replacement cost approach [20], the ‘opportunity cost approach’ is  
19  
20  
21 156 recommended by the developers of RUD for estimating informal care costs [2,5,22]. We  
22  
23  
24 157 used the opportunity cost approach to assess informal care time as forgone wages for  
25  
26  
27 158 caregivers [2,5,9]. We used caregivers’ monthly mean wages stratified by sex and age to  
28  
29  
30 159 value informal care. We assessed informal care costs for caregivers who were not working  
31  
32  
33 160 or who were over 65 years of age at 30% of the mean wage of employed caregivers [23–  
34  
35  
36 161 26]. A maximum daily informal care time of 16 hours was assumed, in order to allow for  
37  
38  
39 162 other activities such as cooking for other family members and sleep [12,27,28].  
40  
41  
42 163 Caregivers were asked to state their contribution to the total informal care in 5-point scale  
43  
44  
45 164 of 20%. In order to treat all caregivers as primary caregivers and estimate the costs  
46  
47  
48 165 associated with all informal care provided to a patient, we adjusted the informal care time  
49  
50  
51 166 by dividing its time by the median of these contribution levels, according to RUD  
52  
53  
54 167 instructions. This adjustment of informal care time was done only when calculating the  
55  
56  
57 168 informal care costs.  
58  
59  
60

1  
2  
3  
4  
5  
6  
7 169 Out-of-pocket payments for LTC services both covered and not covered by insurance  
8  
9  
10 170 were included in the questionnaire. We asked for these out-of-pocket payments through  
11  
12  
13 171 categories that were easy to answer (no payments, under JPY9,999, JPY10,000–24,999,  
14  
15  
16 172 JPY25,000–49,999, JPY50,000–74,999, JPY75,000–99,999, JPY100,000–124,999,  
17  
18  
19 173 JPY125,000–149,999, JPY150,000–299,999, JPY300,000–499,999, and over  
20  
21  
22 174 JPY500,000). We adjusted the answers by capping the upper limit of the limit amount  
23  
24  
25 175 (Care-needs level 1; JPY166,920, Care-needs level 5; JPY 360,650) depending on each  
26  
27  
28 176 care-needs level or each ratio of copayment (10% or 20%) if the answers were over it.  
29  
30  
31 177 These costs were substituted by a median of each category, and we calculated the  
32  
33  
34 178 weighted average as the following formula: 
$$\frac{\sum_{i=0}^k (\text{median of category}_i) * n_i}{\sum n}$$

35  
36  
37 179 All costs were converted from Japanese yen to US dollars using the purchasing power  
38  
39  
40 180 parity rate in 2016 (¥102 = \$1) provided by the Organization for Economic Cooperation  
41  
42  
43 181 and Development.

## 44 45 182 *2.5. Inclusion and exclusion criteria*

46  
47  
48 183 With respondents, we only focused on community settings for people with dementia  
49  
50  
51 184 who lived in their own home. We excluded respondents based on the following criteria:  
52  
53  
54 185 (1) people with dementia who were hospitalized or lived in nursing home, (2) lack of data  
55  
56  
57 186 about out-of-pocket payments for LTC services or care-needs levels, (3) contradictions  
58  
59  
60

1  
2  
3  
4  
5  
6 187 in relationships between caregivers and people with dementia, and (4) contradictions in  
7  
8  
9 188 care time (over 24 hours). When the age difference was less than 15 years and the person  
10  
11  
12 189 with dementia was a parent or child (not in-law), these cases were identified as  
13  
14  
15 190 contradictions.

## 18 191 *2.6. Statistical analysis*

20  
21 192 We conducted descriptive analysis for characteristics of people with dementia and  
22  
23  
24 193 caregivers. We then stratified the informal care time and dementia care costs by the care-  
25  
26  
27 194 needs level and cohabitation to test our hypothesis that high care-needs level or people  
28  
29  
30 195 who lives with caregivers need more informal care time. In this description, we didn't  
31  
32  
33 196 adjusted informal care time by caregivers' contribution rate.

34  
35  
36 197 Also, we used chi-square automatic interaction detection (CHAID) analysis to identify  
37  
38  
39 198 the characteristics of people with dementia and caregivers who needed more care services.  
40  
41  
42 199 In CHAID analysis, the dependent variable would be divided into sub-groups by the most  
43  
44  
45 200 explanatory independent variables. These groups could be formed by any possible  
46  
47  
48 201 combination with all independent variables. Especially, we conducted an exhaustive  
49  
50  
51 202 CHAID analysis that repeats the trial until it finds the optimal combination of all  
52  
53  
54 203 independent variables. The CHAID dendograms provide a visual depiction of criteria and  
55  
56  
57 204 predictor variable interactions that might not be detected in traditional analytic procedures.  
58  
59  
60

1  
2  
3  
4  
5  
6 205 We set informal care costs, out-of-pocket payments for LTC services covered by  
7  
8  
9 206 insurance and out-of-pocket payments for LTC services not covered by insurance as  
10  
11  
12 207 dependent variables. Then, we used the characteristics of people with dementia (age, sex,  
13  
14  
15 208 care-need level, dementia types, ADL and IADL functions, and primary disease as the  
16  
17  
18 209 reason for care), the characteristics of caregivers (age, sex, marital status, children,  
19  
20  
21 210 cohabitation with people with dementia, visiting time, relationship to people with  
22  
23  
24 211 dementia, and occupation), and economic factors (the ratio of copayments for healthcare  
25  
26  
27 212 services and family income of caregivers). We treated the ratio of copayments for  
28  
29  
30 213 healthcare services as income proxy variable because this ratio was decided by income of  
31  
32  
33 214 people with dementia. We set the following criteria: tree depth was limited to three levels,  
34  
35  
36 215 no group smaller than 100 was split, no group smaller than 30 was formed, and the p-  
37  
38  
39 216 value for all statistical tests was under 0.05.

41  
42 217 All data were analyzed using IBM SPSS Statistics 23.0 for Windows (SPSS Japan Inc.,  
43  
44  
45 218 Tokyo, Japan).

#### 48 219 *2.6. Ethical considerations and consents*

50  
51 220 This study was approved by the Ethics committee of Kyoto University Graduate School  
52  
53  
54 221 of Medicine (R0487). All participants were volunteers and they were informed that there  
55  
56  
57 222 was no obligation to participate in the study, and only people who consented to this study  
58  
59  
60



1  
2  
3  
4  
5  
6 223 completed the questionnaire.  
7  
8

9 224 *2.7. Patient and public involvement*  
10  
11

12 225 Patients were not formally involved in this study; however, their caregivers participated  
13  
14  
15 226 in our online-based questionnaire survey. Caregivers, who constituted the online panel,  
16  
17  
18 227 were sent the invitation by the Internet research company. Patients and their caregivers  
19  
20  
21 228 can view the results of this study when it is published in a peer-reviewed journal.  
22  
23

24 229 **3. Results**  
25  
26

27 230 *3.1. Characteristics of people with dementia and their caregivers*  
28  
29

30 231 A total of 3,916 caregivers answered the questionnaire. We focused only on people  
31  
32  
33 232 with dementia who lived in their own home (n=2277). However, we excluded the data  
34  
35  
36 233 according to the criteria and the final sample comprised 1,383 respondents (Figure 1).  
37  
38

39 234 Table 1 shows the characteristics of people with dementia and their caregivers. More  
40  
41  
42 235 than half of the people with dementia were female (66.7%), and the mean age was 81.8  
43  
44  
45 236 years. In contrast, more than half of the caregivers were male (61.7%), and the mean age  
46  
47  
48 237 was 52.2 years. 1,233 people (89.2%) responded that ADL functions such as meals and  
49  
50  
51 238 toilet use could be managed by themselves, while IADL functions such as cleaning and  
52  
53  
54 239 shopping could be done by one person in the same way. There were only 788 people  
55  
56  
57 240 (57.0%) who did the latter by themselves.  
58  
59  
60

1  
2  
3  
4  
5  
6  
7 241 *3.2. Informal care time and costs of dementia care*

8  
9 242 The mean daily informal care time was 9.36 hours in total. The time for only ADL was  
10  
11  
12 243 4.97 hours and for only IADL was 4.39 hours. On the other hand, monthly informal care  
13  
14  
15 244 time (ADL+IADL) was 166.32 hours. Table 2 shows the differences in daily informal  
16  
17  
18 245 care time and personal cost of dementia care among the care-need levels. In this table, we  
19  
20  
21 246 didn't adjust by contribution rate. Informal care times increased with care-needs levels,  
22  
23  
24 247 especially in ADL. Out-of-pocket payments for LTC services were less than informal  
25  
26  
27 248 care costs in all of the care-needs levels.

29  
30 249

31  
32 250 *3.3. Classification with classification trees*

33  
34  
35 251 Figure 2 shows the results of CHAID analysis for informal care costs. Informal care  
36  
37  
38 252 costs were related to caregivers' employment status, cohabitation, age, and care-needs  
39  
40  
41 253 levels or ADL function of people with dementia. When the caregiver acquired family care  
42  
43  
44 254 leave, informal care cost was the highest (node 2). For the caregivers who were between  
45  
46  
47 255 43-52 years old (node 12) and worked outside the home as well as cohabited with people  
48  
49  
50 256 with dementia, informal care costs were high, similar to caregivers who acquired family  
51  
52  
53 257 care leave (node 2). Even if the caregiver did not work, informal care costs were higher  
54  
55  
56 258 with high care-needs levels (node 6-8). The costs for cohabiting caregivers (node 5) were  
57  
58  
59 259 higher than for those not cohabiting (node 4). For those not cohabiting and the person  
60

1  
2  
3  
4  
5  
6 260 with dementia could not walk without assistance (node 9), informal care costs were higher  
7  
8  
9 261 than for those that could walk (node 10) .  
10  
11

12 262 Out-of-pocket payments for LTC services covered by insurance were related to care-  
13  
14  
15 263 need levels, ADL or IADL functions, sex (both the people with dementia and caregivers)  
16  
17  
18 264 and caregivers' household incomes (Figure 3). Especially, if the people with dementia  
19  
20  
21 265 could bathe or use the toilet by themselves, out-of-pocket payments would be about 65%  
22  
23  
24 266 lower (nodes 9-10, 15-18). On the other hand, if out-of-pocket payments were not covered  
25  
26  
27 267 by insurance, they were related to caregivers' household incomes, income proxy variable,  
28  
29  
30 268 ADL or IADL functions of people with dementia, and age of people with dementia  
31  
32  
33 269 (Figure 4). Both the out-of-pocket payments that were covered by insurance and those  
34  
35  
36 270 that were not were related to caregivers' house hold income or ADL functions which  
37  
38  
39 271 affected the ability to pay and service use volume.  
40

41 272

#### 42 43 44 273 **4. Discussion**

45  
46  
47 274 In this study, we first demonstrated that informal care time for ADL or IADL functions  
48  
49  
50 275 increased with high care-needs levels as our hypothesis stipulated (Care-need level 1:  
51  
52  
53 276 2.2hours, level 3: 3.4 hours. level 5: 4.6 hours). Second, we established that the  
54  
55  
56 277 combination of characteristics of both people with dementia and their caregivers were  
57  
58  
59 278 related to dementia care costs through the classification tree analysis. Caregivers'  
60

1  
2  
3  
4  
5  
6 279 employment and cohabitation status were mainly related to informal care costs, and the  
7  
8  
9 280 costs were the highest when caregivers took nursing care leave, which caregivers leave  
10  
11  
12 281 work due to caregiving. Furthermore, when caregivers worked at an occupation and lived  
13  
14  
15 282 separately, or the people with dementia could not walk, the costs doubled. Out-of-pocket  
16  
17  
18 283 payments for LTC services covered by insurance were mainly related to care-need levels  
19  
20  
21 284 and ADL and IADL functions. In the case of low care-needs levels, where care was  
22  
23  
24 285 needed for toileting or bathing, high out-of-pocket payments were required for LTC  
25  
26  
27 286 insurance services. On the other hand, out-of-pocket payments were related to caregivers'  
28  
29  
30 287 household income levels or income proxy variable. Caregivers with high annual incomes  
31  
32  
33 288 (more than \$117,648 US) made out-of-pocket payments for dementia care of full amounts  
34  
35  
36 289 that were two to five times more than others.

37  
38  
39 290 Informal care costs were mainly related to caregivers' characteristics such as  
40  
41  
42 291 employment or cohabitation status in the classification tree, which illustrated related  
43  
44  
45 292 factors by order of precedence. In many previous studies, ADL functions or dementia  
46  
47  
48 293 severity were explained as related factors in regression models [9–12]. Some studies  
49  
50  
51 294 showed caregivers' characteristics such as employment status were related to informal  
52  
53  
54 295 care costs [9,29,30], but few studies considered all of the caregivers' characteristics. Thus,  
55  
56  
57 296 caregiver factors may be as important as factors related to people with dementia are.  
58  
59  
60

1  
2  
3  
4  
5  
6 297 Furthermore, we considered the combination of characteristics of both people with  
7  
8  
9 298 dementia and their caregivers. For example, informal care costs doubled when caregivers  
10  
11  
12 299 lived separately and people with dementia could not walk. Many previous studies  
13  
14  
15 300 established the determinants by regression analysis[9,12,31–34]. Although it is possible  
16  
17  
18 301 to understand the influence on the objective variable adjusted in the multivariate by  
19  
20  
21 302 regression analysis, the combinations between explanatory variables have not been  
22  
23  
24 303 clarified. CHAID analysis provided the classification only for related characteristics in  
25  
26  
27 304 the outcome. Such combinations suggest that support should be provided to caregivers  
28  
29  
30 305 who cannot live with people with dementia or caregivers who are not employed (Figure  
31  
32  
33 306 2, Node 3-4).

36 307 The association between out-of-pocket payments for LTC services covered by  
37  
38  
39 308 insurance and care-need levels is reasonable because the benefit limit standard amounts  
40  
41  
42 309 for formal care services at home are decided in relation to care-need levels[35]. In  
43  
44  
45 310 addition, when people with dementia had a high care-needs level and their caregiver's  
46  
47  
48 311 household income was high, out-of-pocket payments were high. Because the  
49  
50  
51 312 determination of service usage within the limit amount is a free contract, people with  
52  
53  
54 313 dementia and their caregivers may decide how they use formal care services depending  
55  
56  
57 314 on how much they can pay for services. High care-needs levels [36], age[10,34,36,37]  
58  
59  
60

1  
2  
3  
4  
5  
6 315 and sex[10,36] were related to the high costs of LTC services. Even for low care-needs  
7  
8  
9 316 levels, the cost may be high when people with dementia need assistance with bathing or  
10  
11  
12 317 toileting. This was affected by LTC insurance services providing specific substitutions,  
13  
14  
15 318 such as bath assistance, and also Ku et al.'s or Dodel et al.'s ADL functions were related  
16  
17  
18 319 to the social care costs[9,30].  
19

20  
21 320 Similarly, economic variables such as household income and income proxy variable  
22  
23  
24 321 were mainly related to out-of-pocket payments for LTC services not covered by insurance  
25  
26  
27 322 (Figure 4). This is because people must pay the full amount if they use LTC services  
28  
29  
30 323 without insurance. In the United States, high copayments are required for the use of LTC  
31  
32  
33 324 services; however, these copayments were related to age, sex, and comorbidities in the  
34  
35  
36 325 cohort study [37]. A part of the result of Hurd et al. was similar to our results in the case  
37  
38  
39 326 of the payments that were covered by insurance for the use of LTC services. Out-of-  
40  
41  
42 327 pocket payments not covered by insurance might occur for over the limit standard  
43  
44  
45 328 amounts or the use of LTC services not covered by insurance (e.g. feeding service[38]).  
46  
47  
48 329 According to the questionnaire responses, people tended to pay for expendables such as  
49  
50  
51 330 diapers, employment of housekeepers, and home repair such as handrail installation as  
52  
53  
54 331 out-of-pocket payments not covered by LTC insurance. Furthermore, except when  
55  
56  
57 332 caregivers' income was high, the cost did not change significantly due to differences in  
58  
59  
60

1  
2  
3  
4  
5  
6 333 ADL and IADL functions as it did for the payments that were covered by insurance.  
7  
8

9 334 These application examples were not really affected by ADL or IADL functions.  
10  
11

12 335 From the viewpoint of independent variables, if people with dementia lacked some  
13  
14

15 336 ADL function, then costs might be higher but in the case of IADL functions this was  
16  
17

18 337 reversed. There is a possibility that some services are used to support the independent  
19  
20

21 338 lives of people with dementia. Some people with dementia who can do housework by  
22  
23

24 339 themselves might move or walk around more, and therefore use more LTC services like  
25  
26

27 340 commuting for care (day service) or commuting for rehabilitation. Also, care-need levels  
28  
29

30 341 were not related to out-of-pocket payments not covered by insurance. The above  
31  
32

33 342 application examples were also not related to care-needs levels. The relationship of  
34  
35

36 343 cohabitation or employment status was the same as in previous studies [9,29,32]. While  
37  
38

39 344 differences of burden of dementia care depended on the dementia types that existed and  
40  
41

42 345 were pointed out [24], dementia types were not related to any other factors in this study.  
43  
44

45 346 In our CHAID analysis, family caregivers' economic status or severity (care-needs levels)  
46  
47

48 347 might have been more important than dementia types to dementia care costs. In creating  
49  
50

51 348 policy for LTC services in an aging society, we must understand the actual conditions  
52  
53

54 349 from not only a societal but also a personal perspective. This is true even if from a societal  
55  
56

57 350 viewpoint, the societal cost of dementia care in the community has been established by  
58  
59  
60

1  
2  
3  
4  
5  
6 351 other countries to be greater than that in institutional care [39]. Furthermore, we need a  
7  
8  
9 352 wide range of perspectives of stakeholders to discuss the dementia care system, while  
10  
11  
12 353 almost all studies of economic burden of dementia stood on societal or payers'  
13  
14  
15 354 viewpoint[7,19–21]. Then, as a first step, we need to understand what people with  
16  
17  
18 355 dementia and their family caregivers are already spending too much money on. We need  
19  
20  
21 356 to recognize the complicated combination of characteristics associated with people with  
22  
23  
24 357 dementia and their caregivers. To this point, the results of this classification could be  
25  
26  
27 358 useful to understanding which situation requires more resources depending on cost types.  
28  
29  
30 359 Our results may suggest that a sustainable dementia care system in Japan should be  
31  
32  
33 360 reconstructed from a personal viewpoint.

36 361 There are some limitations to this study. First, we conducted an online questionnaire  
37  
38  
39 362 survey with caregivers of people with dementia. Traditionally, respondents who use the  
40  
41  
42 363 Internet tend to be male and relatively young, reflecting the general characteristics of  
43  
44  
45 364 online research [40–42]. The sample may therefore not be representative of all caregivers  
46  
47  
48 365 because the sample is limited to those who have access to the Internet and are registered  
49  
50  
51 366 with an Internet research company [43]. Certainly, we cannot extrapolate the  
52  
53  
54 367 representative value in each node of the CHAID tree to the population as a whole.  
55  
56  
57 368 However, this study focused on finding a combination of independent variables related to  
58  
59  
60



1  
2  
3  
4  
5  
6 369 the dependent variables (informal care cost and financial burden), taking into account the  
7  
8  
9 370 interaction between multiple independent variables. The significance of subgroups made  
10  
11  
12 371 by combinations of variables may not change significantly even if the population changes.  
13  
14  
15 372 Therefore, in this study, influence due to the difference between this sample and general  
16  
17  
18 373 public is not considered to be a practical problem. However, further research (e.g. a  
19  
20  
21 374 paper-based questionnaire survey mailed to the family caregivers association) to collect  
22  
23  
24 375 representative samples might be needed in the future. Second, we didn't consider the  
25  
26  
27 376 subjective burden of care and depressive symptoms. These mental burdens are considered  
28  
29  
30 377 to be important factors in explaining the actual state of care costs, and many previous  
31  
32  
33 378 studies in Japan have covered subjective costs [44–46]. In the future, in addition to the  
34  
35  
36 379 burden of time and money, it would be preferable to measure subjective burdens. Third,  
37  
38  
39 380 we estimated informal care costs only by the opportunity cost approach. Some studies  
40  
41  
42 381 indicated results estimated by both opportunity cost approach and replacement cost  
43  
44  
45 382 approach. The opportunity cost approach might be underestimated in comparison to the  
46  
47  
48 383 replacement approach[9,37]

51 384

## 54 385 **Conclusions**

1  
2  
3  
4  
5  
6 386 This study clarified the difference in dementia care costs between classified subgroups  
7  
8  
9 387 by considering the combination of the situations of both people with dementia and their  
10  
11  
12 388 caregivers. Informal care costs were related to caregivers' employment and cohabitation  
13  
14  
15 389 status rather to the situation of people with dementia. On the other hand, out-of-pocket  
16  
17  
18 390 payments for long-term care services were related to care-needs levels and family  
19  
20  
21 391 economic status. These classifications will be useful in understanding which situation  
22  
23  
24 392 represents a greater economic burden, and helpful in improving the sustainability of the  
25  
26  
27 393 dementia care system in Japan.

28  
29  
30 394

31  
32  
33 395 **Footnotes**

34  
35  
36 396 *Abbreviations*

37  
38  
39 397 LTC: Long-Term Care

40  
41  
42 398 RUD: Resource Utilization in Dementia

43  
44  
45 399 ADL: Activities of Daily Life

46  
47  
48 400 IADL: Instrumental Activities of Daily Life

49  
50  
51 401 CHAID analysis: chi-square automatic interaction detection analysis

52  
53  
54 402 *Authors' contribution*

55  
56  
57 403 TN, SN and YI designed the study. All authors discussed for preparing the questionnaire.  
58  
59  
60

1  
2  
3  
4  
5  
6 404 TN mainly analyzed all data, and HU, SK, AW and YI advised for analysis. TN prepared  
7  
8  
9 405 the draft of the manuscript, then all authors contributed to rewrite it. All authors read and  
10  
11  
12 406 approved the final manuscript.  
13  
14

15 407 *Funding sources*  
16

17  
18 408 This study was financially supported by a Health Sciences Research Grant from the  
19  
20  
21 409 Ministry of Health, Labour and Welfare of Japan (H27-ninntishou-ippan-001), the Japan  
22  
23  
24 410 Foundation for Aging and Health (H27), and a Grant-in-Aid for Scientific Research from  
25  
26  
27 411 the Japan Society for the Promotion of Science ([A]16H02634). The funders had no role  
28  
29  
30 412 in the study design, data collection and analysis, decision to publish, or preparation of the  
31  
32  
33 413 manuscript.  
34

35  
36 414 *Competing interest*  
37

38  
39 415 None declared.  
40  
41

42 416 *Acknowledgements*  
43

44  
45 417 None.  
46  
47

48 418 *Conflicts of interest*  
49

50  
51 419 None.  
52  
53

54 420 *Data sharing statement*  
55

56  
57 421 No additional data are available.  
58  
59  
60

1  
2  
3  
4  
5  
6  
7  
8  
9  
10  
11  
12  
13  
14  
15  
16  
17  
18  
19  
20  
21  
22  
23  
24  
25  
26  
27  
28  
29  
30  
31  
32  
33  
34  
35  
36  
37  
38  
39  
40  
41  
42  
43  
44  
45  
46  
47  
48  
49  
50  
51  
52  
53  
54  
55  
56  
57  
58  
59  
60

422

For peer review only

423 **References**

- 424 1 Ninomiya T, Kiyohara Y, Obara T, *et al.* A study on future estimation of the  
425 elderly population of dementia in Japan Grant-in-Aid for Scientific Research for  
426 Ministru of Health, Labor and Welfare in 2014( H26-Tokubetsu-Shitei-036).  
427 2014. [https://mhlw-](https://mhlw-grants.niph.go.jp/niph/search/NIDD00.do?resrchNum=201405037A)  
428 [grants.niph.go.jp/niph/search/NIDD00.do?resrchNum=201405037A](https://mhlw-grants.niph.go.jp/niph/search/NIDD00.do?resrchNum=201405037A)
- 429 2 Prince M, Wimo A, Guerchet M, *et al.* World Alzheimer Report 2015: the global  
430 impact of dementia. 2015. <https://www.alz.co.uk/research/world-report-2015>  
431 (accessed 3 Apr 2016).
- 432 3 Wimo A, Jönsson L, Fratiglioni L, *et al.* The societal costs of dementia in  
433 Sweden 2012 - relevance and methodological challenges in valuing informal  
434 care. *Alzheimers Res Ther* 2016;**8**:59. doi:10.1186/s13195-016-0215-9
- 435 4 Wimo A, Strauss E Von, Nordberg G. Time spent on informal and formal care  
436 giving for persons with dementia in Sweden. *Heal Po* 2002;**61**:255–68.
- 437 5 Wimo A, Prince M. World Alzheimer Report 2010 THE GLOBAL ECONOMIC  
438 IMPACT OF DEMENTIA.  
439 2010. [https://www.alz.co.uk/research/files/WorldAlzheimerReport2010Executive](https://www.alz.co.uk/research/files/WorldAlzheimerReport2010ExecutiveSummary.pdf)  
440 [Summary.pdf](https://www.alz.co.uk/research/files/WorldAlzheimerReport2010ExecutiveSummary.pdf) (accessed 3 Apr 2016).
- 441 6 Wimo A, Ali G, Wu Y, *et al.* The worldwide costs of dementia 2015 and

- 1  
2  
3  
4  
5  
6 442 comparisons with 2010. *Alzheimer's Dement* 2016;:1–7.  
7  
8  
9 443 doi:10.1016/j.jalz.2016.07.150  
10  
11  
12 444 7 Jönsson L, Lin P-J, Khachaturian AS. Special topic section on health economics  
13  
14  
15 445 and public policy of Alzheimer's disease. *Alzheimer's Dement* 2017;**13**:201–4.  
16  
17  
18 446 doi:10.1016/j.jalz.2017.02.004  
19  
20  
21 447 8 Nakabe T, Sasaki N, Uematsu H, *et al*. The personal cost of dementia care in  
22  
23  
24 448 Japan: A comparative analysis of residence types. *Int J Geriatr Psychiatry*  
25  
26  
27 449 2018;**33**:1243–52. doi:10.1002/gps.4916  
28  
29  
30 450 9 Ku L-JE, Pai M-C, Shih P-Y. Economic Impact of Dementia by Disease  
31  
32  
33 451 Severity: Exploring the Relationship between Stage of Dementia and Cost of  
34  
35  
36 452 Care in Taiwan. *PLoS One* 2016;**11**:e0148779.  
37  
38  
39 453 doi:10.1371/journal.pone.0148779  
40  
41  
42 454 10 Leicht H, Heinrich S, Heider D, *et al*. Net costs of dementia by disease stage.  
43  
44  
45 455 *Acta Psychiatr Scand* 2011;**124**:384–95. doi:10.1111/j.1600-0447.2011.01741.x  
46  
47  
48 456 11 Leicht H, König H-H, Stuhldreher N, *et al*. Predictors of Costs in Dementia in a  
49  
50  
51 457 Longitudinal Perspective. *PLoS One* 2013;**8**:e70018.  
52  
53  
54 458 doi:10.1371/journal.pone.0070018  
55  
56  
57 459 12 Farré M, Haro JM, Kostov B, *et al*. Direct and indirect costs and resource use in  
58  
59  
60

- 1  
2  
3  
4  
5  
6 460 dementia care: A cross-sectional study in patients living at home. *Int J Nurs Stud*  
7  
8  
9 461 2016;**55**:39–49.  
10  
11  
12 462 13 Ministry of Internal Affairs and Communications. Survey on Time Use and  
13  
14  
15 463 Leisure Activities in 2016. 2017.  
16  
17  
18 464 <http://www.stat.go.jp/data/shakai/2016/pdf/gaiyou2.pdf> (accessed 6 Mar 2018).  
19  
20  
21 465 14 Wimo A, Jonsson L, Zbrozek A. The Resource Utilization in Dementia (RUD)  
22  
23  
24 466 instrument is valid for assessing informal care time in community-living patients  
25  
26  
27 467 with dementia. *J Nutr Health Aging* 2010;**14**:685–  
28  
29  
30 468 90.<http://www.ncbi.nlm.nih.gov/pubmed/20922346> (accessed 3 Feb 2016).  
31  
32  
33 469 15 Wimo A, Gustavsson A, Jonsson L, *et al.* Application of resource utilization in  
34  
35  
36 470 dementia (RUD) instrument in a global setting. *Alzheimer's Dement* 2013;**9**:429–  
37  
38  
39 471 35. doi:10.1016/j.jalz.2012.06.008  
40  
41  
42 472 16 Mesterton J, Wimo A, By A, *et al.* Cross sectional observational study on the  
43  
44  
45 473 societal costs of Alzheimer's disease. *Curr Alzheimer Res* 2010;**7**:358–  
46  
47  
48 474 67.<http://www.ncbi.nlm.nih.gov/pubmed/19939223> (accessed 11 Jun 2018).  
49  
50  
51 475 17 Ministry of Health Labour and Welfare. Mechanism and procedures for  
52  
53  
54 476 cartification of care-needs levels. [https://www.mhlw.go.jp/file/05-Shingikai-](https://www.mhlw.go.jp/file/05-Shingikai-11901000-Koyoukintoujidoukateikyoku-Soumuka/0000126240.pdf)  
55  
56  
57 477 11901000-Koyoukintoujidoukateikyoku-Soumuka/0000126240.pdf (accessed 12  
58  
59  
60

- 1  
2  
3  
4  
5  
6 478 Feb 2019).
- 7  
8  
9 479 18 Lin H-R, Otsubo T, Imanaka Y. Survival analysis of increases in care needs  
10  
11  
12 480 associated with dementia and living alone among older long-term care service  
13  
14  
15 481 users in Japan. *BMC Geriatr* 2017;**17**:182. doi:10.1186/s12877-017-0555-8  
16  
17  
18 482 19 Mauskopf J, Mucha L. A Review of the Methods Used to Estimate the Cost of  
19  
20  
21 483 Alzheimer ' s Disease in the United States. *Am J Alzheimer ' s Dis Other*  
22  
23  
24 484 *Dementias* 2011;**26**:298–309. doi:10.1177/1533317511407481  
25  
26  
27 485 20 Quentin W, Sg R, Lupp M, *et al*. Cost-of-illness studies of dementia : a  
28  
29  
30 486 systematic review focusing on stage dependency of costs. *Acta Psychiatr Scand*  
31  
32  
33 487 2010;**121**:243–59. doi:10.1111/j.1600-0447.2009.01461.x  
34  
35  
36 488 21 Schaller S, Mauskopf J, Kriza C, *et al*. The main cost drivers in dementia : a  
37  
38  
39 489 systematic review. *Int J Geriatr Psychiatry* 2015;**30**:111–29.  
40  
41  
42 490 doi:10.1002/gps.4198  
43  
44  
45 491 22 Wimo A, Winblad B, Jönsson L. An estimate of the total worldwide societal  
46  
47  
48 492 costs of dementia in 2005. *Alzheimer ' s Dement* 2007;**3**:81–91.  
49  
50  
51 493 doi:10.1016/j.jalz.2007.02.001  
52  
53  
54 494 23 Johannesson M, Borgquis L, Jönsson B, *et al*. The costs of treating hypertension -  
55  
56  
57 495 an analysis of different cut-off points. *Health Policy (New York)* 1991;**18**:141–  
58  
59  
60



- 1  
2  
3  
4  
5  
6 496 50. doi:10.1016/0168-8510(91)90095-F  
7  
8  
9 497 24 Costa N, Ferliccoq L, Derumeaux-burel H, *et al.* Comparison of Informal Care  
10  
11  
12 498 Time and Costs in Different Age-Related Dementias : A Review. *Biomed Res Int*  
13  
14  
15 499 2013;**2013**:1–15.  
16  
17  
18 500 25 Åkerborg Ö, Lang A, Wimo A, *et al.* Cost of Dementia and Its Correlation With  
19  
20  
21 501 Dependence. *J Aging Health* Published Online First: 26 January 2016.  
22  
23  
24 502 doi:10.1177/0898264315624899  
25  
26  
27 503 26 Bergvall N, Brinck P, Eek D, *et al.* Relative importance of patient disease  
28  
29  
30 504 indicators on informal care and caregiver burden in Alzheimer ' s disease. *Int*  
31  
32  
33 505 *Psychogeriatrics* 2011;:73–85. doi:10.1017/S1041610210000785  
34  
35  
36 506 27 Rattinger G, Schwartz S, Mullins C, *et al.* Dementia severitiy and the longitudinal  
37  
38  
39 507 costs of informal care in the Cache County population. *Alzheimer's Dement*  
40  
41  
42 508 2015;**11**:946–54.  
43  
44  
45 509 28 Gustavsson A, Brinck P, Bergvall N, *et al.* Predictors of costs of care in  
46  
47  
48 510 Alzheimer's disease: a multinational sample of 1222 patients. *Alzheimers Dement*  
49  
50  
51 511 2011;**7**:318–27. doi:10.1016/j.jalz.2010.09.001  
52  
53  
54 512 29 Gervès C, Chauvin P, Bellanger MM. Evaluation of full costs of care for patients  
55  
56  
57 513 with Alzheimer ' s disease in France : The predominant role of informal care.  
58  
59  
60

- 1  
2  
3  
4  
5  
6 514 *Health Policy (New York)* 2014;**116**:114–22. doi:10.1016/j.healthpol.2014.01.001
- 7  
8  
9 515 30 Dodel R, Belger M, Reed C, *et al.* Determinants of societal costs in Alzheimer’s  
10  
11  
12 516 disease: GERAS study baseline results. *Alzheimers Dement* 2015;**11**:933–45.  
13  
14  
15 517 doi:10.1016/j.jalz.2015.02.005
- 16  
17  
18 518 31 Hurd MD, Martorell P, Delavande A, *et al.* Monetary Costs of Dementia in the  
19  
20  
21 519 United States. *N Engl J Med* 2013;**368**:1326–34. doi:10.1056/NEJMsa1204629
- 22  
23  
24 520 32 Dodel R, Belger M, Reed C, *et al.* Determinants of societal costs in Alzheimer’s  
25  
26  
27 521 disease. *Alzheimer’s Dement* 2015;**11**:933–45.
- 28  
29  
30 522 33 Peña-Longobardo L, Oliva-moreno J. Economic valuation and determinants of  
31  
32  
33 523 informal care to people with Alzheimer ’ s disease. *Eur J Heal Econ*  
34  
35  
36 524 2015;**16**:507–15. doi:10.1007/s10198-014-0604-6
- 37  
38  
39 525 34 André Hajek , Christian Brettschneider, Annette Ernst, Tina Posselt, Birgitt  
40  
41  
42 526 Wiese, Jana Prokein, Siegfried Weyerer, Jochen Werle, Angela Fuchs et al.  
43  
44  
45 527 Longitudinal predictors of informal and formal caregiving time in community-  
46  
47  
48 528 dwelling dementia patients. *Soc Psychiatry Psychiatr Epidemiol* 2015;:1–10.
- 49  
50  
51 529 35 Tokyo Metropolitan Government. *The Long-term Care Insurance System : Long-*  
52  
53  
54 530 *term Care Service Costs to Be Paid by th User.*  
55  
56  
57 531 [http://www.fukushihoken.metro.tokyo.jp/kourei/koho/kaigo\\_pamph.files/p.10kai](http://www.fukushihoken.metro.tokyo.jp/kourei/koho/kaigo_pamph.files/p.10kai)  
58  
59  
60

- 1  
2  
3  
4  
5  
6 532 gohoken-english.pdf (accessed 12 Feb 2019).  
7  
8  
9 533 36 Huei-Ru Lin, Tetsuya Otsubo and YI. The Effects of Dementia and Long-Term  
10  
11  
12 534 Care Services on the Deterioration of Care-needs Levels of the Elderly in Japan.  
13  
14  
15 535 *Medicine (Baltimore)* 2015;**94**:1–7.  
16  
17  
18 536 37 Michael D. Hurd, Paco Martorell, Adeline Delavande, Kathleen J. Mullen and  
19  
20  
21 537 KML. Monetary Costs of Dementia in the United States. *N Engl J Med*  
22  
23  
24 538 2013;**368**:1326–34. doi:10.1056/NEJMsa1204629.Monetary  
25  
26  
27 539 38 Ministry of Health Labour and Welfare. Reference case examples of long-term  
28  
29  
30 540 care insurance services for constructing community-based integrated care system.  
31  
32  
33 541 2016. <https://www.mhlw.go.jp/file/06-Seisakujouhou-12300000->  
34  
35  
36 542 [Roukenkyoku/guidebook-bunkatu1.pdf](#) (accessed 12 Feb 2019).  
37  
38  
39 543 39 König H, Leicht H, Brettschneider C, *et al.* The Costs of Dementia From the  
40  
41  
42 544 Societal Perspective : Is Care Provided in the Community Really Cheaper than  
43  
44  
45 545 Nursing Home Care ? *JAMDA* 2014;**15**:117–26.  
46  
47  
48 546 doi:10.1016/j.jamda.2013.10.003  
49  
50  
51 547 40 Eysenbach G. Improving the quality of Web surveys: the Checklist for Reporting  
52  
53  
54 548 Results of Internet E-Surveys (CHERRIES). *J Med Internet Res* 2004;**6**:e34.  
55  
56  
57 549 doi:10.2196/jmir.6.3.e34  
58  
59  
60

- 1  
2  
3  
4  
5  
6 550 41 Eysenbach G, Wyatt J. Using the Internet for Surveys and Health Research. *J*  
7  
8  
9 551 *Med Internet Res* 2002;**4**:e13. doi:10.2196/jmir.4.2.e13  
10  
11  
12 552 42 Fujihara S, Inoue A, Kubota K, *et al.* Caregiver Burden and Work Productivity  
13  
14  
15 553 Among Japanese Working Family Caregivers of People with Dementia. *Int J*  
16  
17  
18 554 *Behav Med* 2018;**1**–11. doi:10.1007/s12529-018-9753-9  
19  
20  
21 555 43 van Gelder MMHJ, Bretveld RW, Roeleveld N. Web-based Questionnaires: The  
22  
23  
24 556 Future in Epidemiology? *Am J Epidemiol* 2010;**172**:1292–8.  
25  
26  
27 557 doi:10.1093/aje/kwq291  
28  
29  
30 558 44 Washio S, Toyoshima Y, Yamazaki R, *et al.* [Factors related to the care burden  
31  
32  
33 559 of family caregivers - focusing on the care burden of caregivers of elderly who  
34  
35  
36 560 needs nursing care -]. *Japanese J Clin Exp Med = Rinshou to Kenkyuu*  
37  
38  
39 561 2012;**89**:1687–91.  
40  
41  
42 562 45 Arai Y, Kumamoto K, Mizuno Y, *et al.* Depression among family caregivers of  
43  
44  
45 563 community-dwelling older people who used services under the Long Term Care  
46  
47  
48 564 Insurance program: a large-scale population-based study in Japan. *Aging Ment*  
49  
50  
51 565 *Health* 2014;**18**:81–91. doi:10.1080/13607863.2013.787045  
52  
53  
54 566 46 Washio S, Nogami Y, Motoyama S, *et al.* [Long-Term Care Insurance Act  
55  
56  
57 567 amendment and care burden of family caregivers for elderly who need long-term  
58  
59  
60

1  
2  
3  
4  
5  
6 568 care at home]. *Japanese J Clin Exp Med = Rinshou to Kenkyuu* 2015;**92**:75–9.  
7  
8

9 569  
10  
11  
12  
13  
14  
15  
16  
17  
18  
19  
20  
21  
22  
23  
24  
25  
26  
27  
28  
29  
30  
31  
32  
33  
34  
35  
36  
37  
38  
39  
40  
41  
42  
43  
44  
45  
46  
47  
48  
49  
50  
51  
52  
53  
54  
55  
56  
57  
58  
59  
60

For peer review only

1  
2  
3  
4  
5  
6  
7 **Figure 1: Selection process for the analysis**

8  
9 This diagram shows the flow of participants who we focused on.  
10

11  
12 **Figure 2: Classification tree of chi-square automatic interaction detection for**  
13 **informal care costs**  
14  
15

16  
17 The dendogram illustrates the combinations of independent variables to clarify who need  
18 or provide more informal care.  
19  
20

21  
22 Abbreviations: ADL, Activities of Daily Living; IADL, Instrumental Activities of Daily  
23 Living; SD, Standard deviation; LTC, Long-term care  
24  
25  
26  
27  
28

29  
30 **Figure 3: Classification tree of chi-square automatic interaction detection for out-**  
31 **of-pocket payments for LTC services covered by insurance**  
32  
33

34  
35 The dendogram illustrates the combinations of independent variables to clarify who need  
36 more LTC insurance services.  
37  
38

39  
40 Abbreviations: ADL, Activities of Daily Living; IADL, Instrumental Activities of Daily  
41 Living; SD, Standard deviation; LTC, Long-term care  
42  
43  
44  
45  
46  
47

48 **Figure 4: Classification tree of chi-square automatic interaction detection for out-**  
49 **of-pocket payments for LTC services not covered by insurance**  
50  
51

52  
53 The dendogram illustrates the combinations of independent variables to clarify who need  
54 more LTC services without insurance.  
55  
56  
57  
58  
59  
60

1  
2  
3  
4  
5  
6 Abbreviations: ADL, Activities of Daily Living; IADL, Instrumental Activities of Daily  
7  
8  
9 Living; SD, Standard deviation; LTC, Long-term care  
10  
11  
12  
13  
14  
15  
16  
17  
18  
19  
20  
21  
22  
23  
24  
25  
26  
27  
28  
29  
30  
31  
32  
33  
34  
35  
36  
37  
38  
39  
40  
41  
42  
43  
44  
45  
46  
47  
48  
49  
50  
51  
52  
53  
54  
55  
56  
57  
58  
59  
60

For peer review only

**Table 1 Characteristics of people with dementia and caregivers**

| <b>People with Dementia</b>                       |  | N=1383     |
|---------------------------------------------------|--|------------|
| Age, mean±SD, y                                   |  | 81.8±10.3  |
| Sex, n (%)                                        |  |            |
| Female                                            |  | 922 (66.7) |
| Male                                              |  | 461 (33.3) |
| Care-needs level, n (%)                           |  |            |
| Support-Needs Level 1-2                           |  | 253 (18.3) |
| Care-Needs Level 1                                |  | 310 (22.4) |
| Care-Needs Level 2                                |  | 335 (24.2) |
| Care-Needs Level 3                                |  | 258 (18.7) |
| Care-Needs Level 4                                |  | 122 (8.8)  |
| Care-Needs Level 5                                |  | 105 (7.6)  |
| ADL/IADL functional capabilities                  |  |            |
| ADL score (0-6), mean±SD                          |  | 3.2±2.0    |
| IADL score (0-7), mean±SD                         |  | 1.3±1.6    |
| Ratio of copayments for healthcare services, n(%) |  |            |
| 10%                                               |  | 961 (69.5) |
| 20%                                               |  | 137 (9.9)  |
| 30%                                               |  | 157 (11.4) |
| Unknown                                           |  | 128 (9.3)  |
| <b>Types of Dementia, n(%)</b>                    |  |            |
| Alzheimer's disease                               |  | 751 (54.3) |
| <b>Caregivers</b>                                 |  |            |
| Age, mean ± SD                                    |  | 52.2±13.1  |
| Sex, n (%)                                        |  |            |
| Female                                            |  | 530 (38.3) |
| Male                                              |  | 853 (61.7) |
| Relationship, n (%)                               |  |            |
| Mother                                            |  | 575 (41.6) |
| Mother-in-law                                     |  | 169 (12.2) |
| Father                                            |  | 288 (20.8) |
| Father-in-law                                     |  | 90 (6.5)   |
| Spouse                                            |  | 99 (7.2)   |
| Sibling                                           |  | 11 (0.8)   |
| Child                                             |  | 10 (0.7)   |
| Friend                                            |  | 5 (0.4)    |
| Other (including grandparents)                    |  | 136 (9.8)  |
| Contribution level for caregiving, n (%)          |  |            |
| 1-20%                                             |  | 395 (28.6) |
| 21-40%                                            |  | 355 (25.7) |
| 41-60%                                            |  | 241 (17.4) |
| 61-80%                                            |  | 166 (12.0) |
| 81-100%                                           |  | 226 (16.3) |
| Currently employed, n (%)                         |  | 532 (38.5) |

SD: Standard deviation, ADL: Activities of Daily Living, IADL: Instrumental Activities



of Daily Living

For peer review only

1  
2  
3  
4  
5  
6  
7  
8  
9  
10  
11  
12  
13  
14  
15  
16  
17  
18  
19  
20  
21  
22  
23  
24  
25  
26  
27  
28  
29  
30  
31  
32  
33  
34  
35  
36  
37  
38  
39  
40  
41  
42  
43  
44  
45  
46  
47  
48  
49  
50  
51  
52  
53  
54  
55  
56  
57  
58  
59  
60

570 **Table 2 Daily informal care time and personal costs of dementia care sorted by care-needs levels**

|                                             |                                                            |              | Support-<br>required level | Care-need<br>level 1 | Care-need<br>level 2 | Care-need<br>level 3 | Care-need<br>level 4 | Care-need<br>level 5 |
|---------------------------------------------|------------------------------------------------------------|--------------|----------------------------|----------------------|----------------------|----------------------|----------------------|----------------------|
| Informal care<br>time<br>(hours/day)        | ADL                                                        | Mean [SD]    | 2.56 [3.23]                | 2.23 [2.54]          | 2.92 [2.90]          | 3.44 [2.90]          | 3.99 [2.40]          | 4.60 [3.85]          |
|                                             |                                                            | Median [IQR] | 1.67 [2.00]                | 1.50 [2.50]          | 2.00 [3.00]          | 3.00 [3.50]          | 4.00 [3.00]          | 3.33 [4.00]          |
|                                             | IADL                                                       | Mean [SD]    | 2.35 [2.62]                | 2.46 [3.05]          | 2.88 [3.26]          | 2.82 [2.92]          | 3.03 [2.59]          | 3.45 [3.77]          |
|                                             |                                                            | Median [IQR] | 2.00 [2.00]                | 1.50 [2.00]          | 2.00 [2.00]          | 2.00 [2.50]          | 2.00 [3.13]          | 2.00 [4.00]          |
| Personal cost<br>of dementia<br>care (US\$) | Informal<br>care cost                                      | Mean [SD]    | 1518 [2017]                | 1271 [1526]          | 1754 [1982]          | 2181 [2220]          | 2112 [2104]          | 2672 [2314]          |
|                                             |                                                            | Median [IQR] | 747 [1646]                 | 709 [1440]           | 1090 [1697]          | 1366 [2459]          | 1535 [1466]          | 1939 [2240]          |
|                                             | OPP for<br>LTC<br>services<br>covered by<br>insurance      | Mean [SD]    | 148 [190]                  | 158 [174]            | 244 [209]            | 313 [217]            | 301 [202]            | 318 [218]            |
|                                             |                                                            | Median [IQR] | 49 [172]                   | 49 [123]             | 172 [319]            | 368 [441]            | 368 [196]            | 368 [441]            |
|                                             | OPP for<br>care<br>services not<br>covered by<br>insurance | Mean [SD]    | 158 [336]                  | 95 [156]             | 278 [695]            | 303 [543]            | 241 [579]            | 352 [998]            |
|                                             |                                                            | Median [IQR] | 49 [172]                   | 49 [172]             | 49 [368]             | 172 [319]            | 49 [368]             | 49 [368]             |

571 ADL: Activities of Daily Living, IADL: Instrumental Activities of Daily Living, SD: Standard deviation, IQR: Interquartile range

572 OPP: Out-of-pocket payments LTC: Long-term care

573

Figure 1

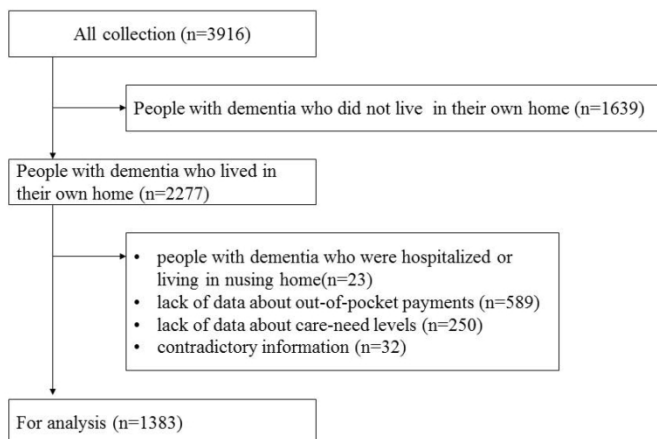

Figure 1: Selection process for the analysis  
This diagram shows the flow of participants who we focused on.

338x190mm (300 x 300 DPI)

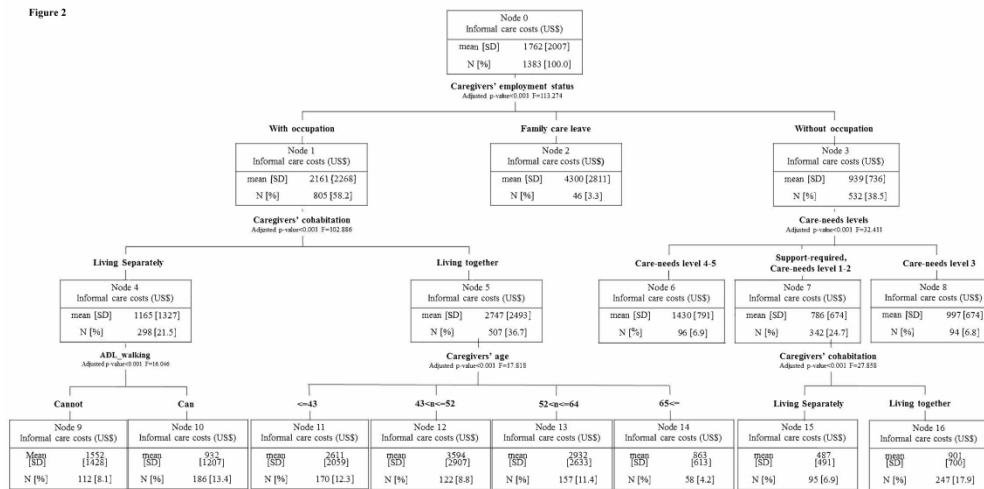

Figure 2: Classification tree of chi-square automatic interaction detection for informal care costs  
 The dendrogram illustrates the combinations of independent variables to clarify who need or provide more informal care.

Abbreviations: ADL, Activities of Daily Living; IADL, Instrumental Activities of Daily Living; SD, Standard deviation; LTC, Long-term care

600x300mm (300 x 300 DPI)

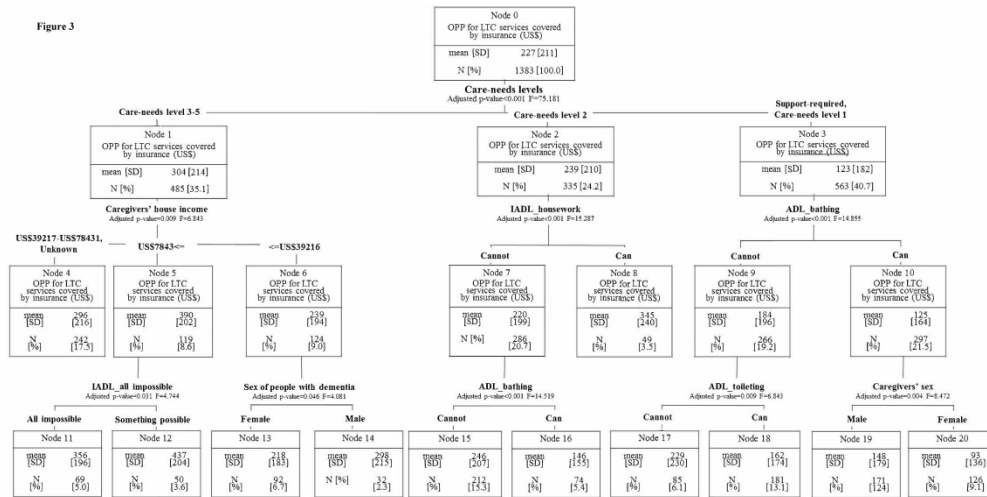

Figure 3: Classification tree of chi-square automatic interaction detection for out-of-pocket payments for LTC services covered by insurance  
 The dendrogram illustrates the combinations of independent variables to clarify who need more LTC insurance services.  
 Abbreviations: ADL, Activities of Daily Living; IADL, Instrumental Activities of Daily Living; SD, Standard deviation; LTC, Long-term care

600x300mm (300 x 300 DPI)



Figure 4: Classification tree of chi-square automatic interaction detection for out-of-pocket payments for LTC services not covered by insurance  
The dendrogram illustrates the combinations of independent variables to clarify who need more LTC services without insurance.  
Abbreviations: ADL, Activities of Daily Living; IADL, Instrumental Activities of Daily Living; SD, Standard deviation; LTC, Long-term care

600x300mm (300 x 300 DPI)

STROBE Statement—Checklist of items that should be included in reports of *cross-sectional studies*

|                              | Item No | Recommendation                                                                                                                                                                                                                                                                                                                                                                                        |
|------------------------------|---------|-------------------------------------------------------------------------------------------------------------------------------------------------------------------------------------------------------------------------------------------------------------------------------------------------------------------------------------------------------------------------------------------------------|
| <b>Title and abstract</b>    | 1       | (a) Indicate the study's design with a commonly used term in the title or the abstract - p.1-2<br>(b) Provide in the abstract an informative and balanced summary of what was done and what was found – p.2-3                                                                                                                                                                                         |
| <b>Introduction</b>          |         |                                                                                                                                                                                                                                                                                                                                                                                                       |
| Background/rationale         | 2       | Explain the scientific background and rationale for the investigation being reported – p.4-5                                                                                                                                                                                                                                                                                                          |
| Objectives                   | 3       | State specific objectives, including any prespecified hypotheses – p.5                                                                                                                                                                                                                                                                                                                                |
| <b>Methods</b>               |         |                                                                                                                                                                                                                                                                                                                                                                                                       |
| Study design                 | 4       | Present key elements of study design early in the paper – p.5                                                                                                                                                                                                                                                                                                                                         |
| Setting                      | 5       | Describe the setting, locations, and relevant dates, including periods of recruitment, exposure, follow-up, and data collection – p.6                                                                                                                                                                                                                                                                 |
| Participants                 | 6       | (a) Give the eligibility criteria, and the sources and methods of selection of participants – p.6 and p.10                                                                                                                                                                                                                                                                                            |
| Variables                    | 7       | Clearly define all outcomes, exposures, predictors, potential confounders, and effect modifiers. Give diagnostic criteria, if applicable – p.6-10                                                                                                                                                                                                                                                     |
| Data sources/<br>measurement | 8*      | For each variable of interest, give sources of data and details of methods of assessment (measurement). Describe comparability of assessment methods if there is more than one group – p.6, 9                                                                                                                                                                                                         |
| Bias                         | 9       | Describe any efforts to address potential sources of bias – p.18-19                                                                                                                                                                                                                                                                                                                                   |
| Study size                   | 10      | Explain how the study size was arrived at – p.6                                                                                                                                                                                                                                                                                                                                                       |
| Quantitative variables       | 11      | Explain how quantitative variables were handled in the analyses. If applicable, describe which groupings were chosen and why – p.11-12                                                                                                                                                                                                                                                                |
| Statistical methods          | 12      | (a) Describe all statistical methods, including those used to control for confounding – p.11-12<br>(b) Describe any methods used to examine subgroups and interactions – p.11-12<br>(c) Explain how missing data were addressed-p.10<br>(d) If applicable, describe analytical methods taking account of sampling strategy – Non applicable<br>(e) Describe any sensitivity analyses – Non applicable |
| <b>Results</b>               |         |                                                                                                                                                                                                                                                                                                                                                                                                       |
| Participants                 | 13*     | (a) Report numbers of individuals at each stage of study—eg numbers potentially eligible, examined for eligibility, confirmed eligible, included in the study, completing follow-up, and analysed – p.12-13<br>(b) Give reasons for non-participation at each stage – Non applicable<br>(c) Consider use of a flow diagram - Figure 1                                                                 |
| Descriptive data             | 14*     | (a) Give characteristics of study participants (eg demographic, clinical, social) and information on exposures and potential confounders – p.13 and Table 1<br>(b) Indicate number of participants with missing data for each variable of interest – Non applicable                                                                                                                                   |
| Outcome data                 | 15*     | Report numbers of outcome events or summary measures – Table 2                                                                                                                                                                                                                                                                                                                                        |
| Main results                 | 16      | (a) Give unadjusted estimates and, if applicable, confounder-adjusted estimates and their precision (eg, 95% confidence interval). Make clear which confounders were adjusted for and why they were included –p.12-13                                                                                                                                                                                 |

|                          |    |                                                                                                                                                                                      |
|--------------------------|----|--------------------------------------------------------------------------------------------------------------------------------------------------------------------------------------|
|                          |    | (b) Report category boundaries when continuous variables were categorized – Non applicable                                                                                           |
|                          |    | (c) If relevant, consider translating estimates of relative risk into absolute risk for a meaningful time period – Non applicable                                                    |
| Other analyses           | 17 | Report other analyses done—eg analyses of subgroups and interactions, and sensitivity analyses – p.13, Figure2-4                                                                     |
| <b>Discussion</b>        |    |                                                                                                                                                                                      |
| Key results              | 18 | Summarise key results with reference to study objectives - p,14-15                                                                                                                   |
| Limitations              | 19 | Discuss limitations of the study, taking into account sources of potential bias or imprecision. Discuss both direction and magnitude of any potential bias – p.18-19                 |
| Interpretation           | 20 | Give a cautious overall interpretation of results considering objectives, limitations, multiplicity of analyses, results from similar studies, and other relevant evidence – p.15-18 |
| Generalisability         | 21 | Discuss the generalisability (external validity) of the study results –p.18-19                                                                                                       |
| <b>Other information</b> |    |                                                                                                                                                                                      |
| Funding                  | 22 | Give the source of funding and the role of the funders for the present study and, if applicable, for the original study on which the present article is based - p.21                 |

\*Give information separately for exposed and unexposed groups.

**Note:** An Explanation and Elaboration article discusses each checklist item and gives methodological background and published examples of transparent reporting. The STROBE checklist is best used in conjunction with this article (freely available on the Web sites of PLoS Medicine at <http://www.plosmedicine.org/>, Annals of Internal Medicine at <http://www.annals.org/>, and Epidemiology at <http://www.epidem.com/>). Information on the STROBE Initiative is available at [www.strobe-statement.org](http://www.strobe-statement.org).



# BMJ Open

## Classification tree model of the personal economic burden of dementia care by related factors of both people with dementia and caregivers in Japan: A cross-sectional online survey

|                                 |                                                                                                                                                                                                                                                                                                                                                                                                                                                                                                                                                                                                                                                                                                                                |
|---------------------------------|--------------------------------------------------------------------------------------------------------------------------------------------------------------------------------------------------------------------------------------------------------------------------------------------------------------------------------------------------------------------------------------------------------------------------------------------------------------------------------------------------------------------------------------------------------------------------------------------------------------------------------------------------------------------------------------------------------------------------------|
| Journal:                        | <i>BMJ Open</i>                                                                                                                                                                                                                                                                                                                                                                                                                                                                                                                                                                                                                                                                                                                |
| Manuscript ID                   | bmjopen-2018-026733.R2                                                                                                                                                                                                                                                                                                                                                                                                                                                                                                                                                                                                                                                                                                         |
| Article Type:                   | Research                                                                                                                                                                                                                                                                                                                                                                                                                                                                                                                                                                                                                                                                                                                       |
| Date Submitted by the Author:   | 07-May-2019                                                                                                                                                                                                                                                                                                                                                                                                                                                                                                                                                                                                                                                                                                                    |
| Complete List of Authors:       | Nakabe, Takayo; Kyoto University Graduate School of Medicine, Department of Healthcare Economics and Quality Management<br>Sasaki, Noriko; Kyoto University Graduate School of Medicine, Department of Healthcare Economics and Quality Management<br>Uematsu, Hironori; Kyoto University Graduate School of Medicine, Department of Healthcare Economics and Quality Management<br>Kunisawa, Susumu; Kyoto University Graduate School of Medicine, Department of Healthcare Economics and Quality Management<br>Wimo, Anders; Karolinska Institute, KI Alzheimer's Disease Research Center (ADRC)<br>Imanaka, Yuichi; Kyoto University Graduate School of Medicine, Department of Healthcare Economics and Quality Management |
| <b>Primary Subject Heading</b>: | Public health                                                                                                                                                                                                                                                                                                                                                                                                                                                                                                                                                                                                                                                                                                                  |
| Secondary Subject Heading:      | Health economics                                                                                                                                                                                                                                                                                                                                                                                                                                                                                                                                                                                                                                                                                                               |
| Keywords:                       | Informal care, RUD, Cost, Classification, Japan                                                                                                                                                                                                                                                                                                                                                                                                                                                                                                                                                                                                                                                                                |
|                                 |                                                                                                                                                                                                                                                                                                                                                                                                                                                                                                                                                                                                                                                                                                                                |

SCHOLARONE™  
Manuscripts

1  
2  
3  
4  
5  
6  
7 1 Classification tree model of the personal economic burden of  
8  
9 2 dementia care by related factors of both people with dementia and  
10  
11  
12 3 caregivers in Japan: A cross-sectional online survey  
13  
14  
15  
16 4

17  
18 5 Takayo Nakabe<sup>a</sup>, Noriko Sasaki<sup>a</sup>, Hironori Uematsu<sup>a</sup>, Susumu Kunisawa<sup>a</sup>, Anders Wimo<sup>b</sup>,  
19  
20  
21 6 Yuichi Imanaka<sup>a</sup>

22  
23  
24 7 <sup>a</sup> Department of Healthcare Economics and Quality Management, Graduate School of  
25  
26  
27 8 Medicine, Kyoto University, Yoshida Konoe-cho, Sakyo-ku, Kyoto, Japan.

28  
29  
30 9 <sup>b</sup> Aging Research Centre, Department of Neurobiology, Care Sciences and Society (NVS),  
31  
32  
33 10 Karolinska Institutet and Stockholm University, Stockholm, Sweden

34  
35  
36 11 Corresponding author:

37  
38  
39 12 Yuichi Imanaka, Professor

40  
41  
42 13 Department of Healthcare Economics and Quality Management,

43  
44  
45 14 Graduate School of Medicine, Kyoto University

46  
47  
48 15 Yoshida Konoe-cho, Sakyo-ku, Kyoto 606-8501, Japan

49  
50  
51 16 E-mail: imanaka-y@umin.net

52  
53  
54 17 Tel: +81-75-753-4454 Fax: +81-75-753-4455

55  
56  
57 18 Word counts: 3750 words  
58  
59  
60

1  
2  
3  
4  
5  
6 19 **Abstract**

7  
8 20 **Objective:**

9  
10  
11 21 The purpose of this study was to clarify the micro-level determinants of the economic  
12  
13  
14 22 burden of dementia care at home in Japanese community settings by classifying them into  
15  
16  
17 23 subgroups of factors related to people with dementia and their caregivers.

18  
19  
20 24 **Methods**

21  
22  
23 25 A cross-sectional online survey was conducted from March 7 to March 14, 2016.  
24  
25  
26 26 Participants were recruited through the panels of Japanese research company. For the  
27  
28  
29 27 calculation of informal care costs, the average wage stratified by sex and age group was  
30  
31  
32 28 used as the opportunity cost. We conducted a chi-square automatic interaction detection  
33  
34  
35 29 analysis to identify the factors related to each cost (informal care costs and out-of-pocket  
36  
37  
38 30 payments for long-term care services) divided into sub categories.

39  
40  
41 31 **Results**

42  
43  
44 32 From 4313 respondents, only 1383 caregivers in community-settings were included in  
45  
46  
47 33 this analysis. In the resultant classifications, informal care cost was mainly related to  
48  
49  
50 34 caregivers' employment status. When caregivers acquired family care leave, informal  
51  
52  
53 35 care costs were the highest. On the other hand, out-of-pocket payments for long-term care  
54  
55  
56 36 were related to care-need levels and family economic status. ADL and IADL functions  
57  
58  
59 37 such as bathing, toileting, and cleaning were related to all costs.  
60

1  
2  
3  
4  
5  
6 **38 Conclusion**  
7

8  
9 **39** This study clarified the difference in dementia care costs between classified subgroups  
10  
11  
12 **40** by considering the combination of the situations of both people with dementia and their  
13  
14  
15 **41** caregivers. Informal care costs were related to caregivers' employment and cohabitation  
16  
17  
18 **42** status rather to the situations of people with dementia. On the other hand, out-of-pocket  
19  
20  
21 **43** payments for long-term care services were related to care-need levels and family  
22  
23  
24 **44** economic status. These classifications will be useful in understanding which situation  
25  
26  
27 **45** represents a greater economic burden, and helpful in improving the sustainability of the  
28  
29  
30 **46** dementia care system in Japan.  
31

32  
33 **47**  
34  
35  
36  
37  
38  
39  
40  
41  
42  
43  
44  
45  
46  
47  
48  
49  
50  
51  
52  
53  
54  
55  
56  
57  
58  
59  
60

view only

1  
2  
3  
4  
5  
6  
7  
8  
9  
10  
11  
12  
13  
14  
15  
16  
17  
18  
19  
20  
21  
22  
23  
24  
25  
26  
27  
28  
29  
30  
31  
32  
33  
34  
35  
36  
37  
38  
39  
40  
41  
42  
43  
44  
45  
46  
47  
48  
49  
50  
51  
52  
53  
54  
55  
56  
57  
58  
59  
60

## 48 **Strengths and limitations of this study**

49 ● This study clarified the difference in dementia care costs between classified  
50 subgroups by considering the combination of the situations of both people with  
51 dementia and their caregivers.

52 ● The chi-square automatic interaction detection dendograms provide a visual  
53 depiction of criteria and predictor variable interactions that might not be detected in  
54 traditional analytic procedures.

55 ● The sample may therefore not be representative of all caregivers because the sample  
56 is limited to those who have access to the Internet and are registered with an Internet  
57 research company.

58 ● We only assessed objective burden of dementia care such as informal care time or  
59 costs, then we didn't consider the subjective burden of care and depressive symptoms.

60

## 61 **1. Introduction**

62 In the aging society of Japan, it is estimated that there are approximately 4.7 million  
63 people living with dementia and that there will be approximately 7 million people with  
64 dementia in 2025 [1]. Given that it is also estimated that the total number of people with  
65 dementia throughout the world will double every 20 years [2], we need to reconsider how  
66 to prepare for dementia care in the community.

67 Long-term care (LTC) services in Japan used by people with dementia in home care  
68 can be classified into three main types: (1) LTC insurance services, (2) LTC services not  
69 covered by insurance, and (3) informal care as mutual assistance by family members.

70 When a person with dementia uses the LTC insurance service, the user bears 10% or 20%  
71 of the service expenses as out-of-pocket payments depending on the person's income  
72 (Article 49-2 of the Long-Term Care Insurance Act). Aside from such copayments, when  
73 LTC services not covered by insurance or exceeding the LTC insurance limit amount are  
74 used, people must pay the full amount. Furthermore, it has been pointed out that informal  
75 care is an important component of home care, yet it places a burden on caregivers [3,4].  
76 Nevertheless, given the estimates of the societal costs of dementia care throughout the  
77 world, the impact of informal care is essential [5,6].

78 The Japanese government recommends policies to shift to patient-centered and home-  
79 centered care to reduce the fiscal burden of the insurance system on community-based  
60

1  
2  
3  
4  
5  
6 80 integrated systems. While micro level of impact of dementia care has not been  
7  
8  
9 81 insufficiently understood[7], to construct a sustainable dementia care system, we clarified  
10  
11  
12 82 the personal economic burden of dementia care for different residence types and  
13  
14  
15 83 demonstrated that the cost at home in a community setting was equal to or higher than in  
16  
17  
18 84 various institutions[8]. Sustainable dementia care systems should be provided not only to  
19  
20  
21 85 benefit the government or insurance system but also to benefit people with dementia and  
22  
23  
24 86 their caregivers. Furthermore, although there are increasing dementia care costs related  
25  
26  
27 87 to the severity of dementia [9–12], it can be seen that the cost of dementia care increases  
28  
29  
30 88 through the interaction of characteristics or situations of people with dementia and their  
31  
32  
33 89 caregivers. Given this interaction, it is necessary to understand the actual conditions by  
34  
35  
36 90 classifying cases where the greatest economic burdens in dementia care are felt.

37  
38  
39 91 Therefore, the purpose of this study is to clarify the micro-level determinants of the  
40  
41  
42 92 economic burden of dementia care at home in community settings by classifying them  
43  
44  
45 93 into subgroups of factors related to people with dementia and their caregivers.

46  
47  
48 94

## 49 95 **2. Methods**

50  
51  
52 96 This study was a cross-sectional study, based on a self-rated, online questionnaire  
53  
54  
55 97 survey. The economic burden of dementia care in this study is roughly divided into  
56  
57  
58 98 informal care costs as opportunity costs and out-of-pocket payments that people actually  
59  
60

1  
2  
3  
4  
5  
6 99 made.

7  
8  
9 100 *2.1. Online survey for data collection on people with dementia and their caregivers*

101 In this cross-sectional study, we conducted an online questionnaire survey from March  
102 3 to March 14, 2016 in cooperation with a commercial research company (Automatic  
103 Internet Research System, Macromill, Inc., Japan). Potential participants fulfilled the  
104 following criteria: (1) aged 30 years or older, (2) non-professional caregiver of someone  
105 with dementia, (3) caring for only one person with dementia, and (4) having no conflicts  
106 of interest with advertising or marketing research entities. A total of 3,600 participants  
107 were recruited from the research company's registrants and divided into different age  
108 groups (850 participants each in the groups aged in 30's, 40's, 50's, and 60's; 200  
109 participants in the group aged  $\geq 70$  years). We excluded caregivers under 29 years of age  
110 because, in Japan, they are estimated to represent only 2% of all caregivers [13].

111 *2.2. Questionnaire*

112 Resource Utilization in Dementia (RUD) [14,15] is a widely used tool to collect data  
113 about resource use in persons with dementia and their caregivers [15]. RUD is available  
114 in more than 60 languages and it is widely used throughout the world. In this study, we  
115 used RUD (Japanese version) items related to the characteristics of people with dementia  
116 and their caregivers, informal care time, employed situation of caregivers, residential



1  
2  
3  
4  
5  
6 117 types of people with dementia, and resource use of nursing care services. We added items  
7  
8  
9 118 related to LTC services and residential types. The questionnaire components were divided  
10  
11  
12 119 into four categories: (1) characteristics of people with dementia, (2) caregivers' situations  
13  
14  
15 120 (e.g., employment and cohabitation status), (3) informal care duration and (4) frequency  
16  
17  
18 121 of utilization of LTC services.

21 122 In this project, we could not get information about severity of dementia data because it  
22  
23  
24 123 was regarded as too difficult for caregivers to estimate that. However, we asked for  
25  
26  
27 124 substantial information about care-needs levels. Care needs reflect function, which is a  
28  
29  
30 125 stronger explanatory factor for costs than cognition [16]. Care-needs levels (Support-  
31  
32  
33 126 needs levels 1-2, Care-needs levels 1-5) determine whether a person is qualified to apply  
34  
35  
36 127 for LTC insurance (Article 27 and 32 of the Long-Term Care Insurance Act). Once an  
37  
38  
39 128 insured person applies to use any LTC service, their mental and physical status is first be  
40  
41  
42 129 assessed by certified researchers using a basic checklist. Based on this checklist, care-  
43  
44  
45 130 need times are estimated using an evidence-based computer algorithm. This algorithm  
46  
47  
48 131 was created from the data on how much LTC services were required in 48 hours for more  
49  
50  
51 132 than 3,000 elderly people as a one-minute time study [17]. After estimating the care-needs  
52  
53  
54 133 time, care-needs levels were determined by an expert panel to indicate the amount of care  
55  
56  
57 134 required by each person while taking into consideration their symptoms and functional  
58  
59  
60

1  
2  
3  
4  
5  
6 135 capability. High care-needs levels indicate increasing dependency and requirement for  
7  
8  
9 136 LTC services [18]. Care-need levels also affect the base amount of the maximum payment  
10  
11  
12 137 for LTC services allowance categories covered by insurance.  
13  
14

### 15 138 *2.3. Informal care time*

16  
17  
18 139 In the questionnaire, informal care time was divided in three domains; support for  
19  
20  
21 140 Activities of Daily Living (ADL), Instrumental Activities of Daily Living (IADL) and  
22  
23  
24 141 Supervision [15]. We asked for the mean caregiving time per day and mean caregiving  
25  
26  
27 142 days per week in the past 30 days. We then multiplied the mean daily caregiving time and  
28  
29  
30 143 caregiving days per week to calculate both weekly and monthly informal care time.  
31  
32  
33 144 Supervision time was excluded in calculating informal care time and costs because  
34  
35  
36 145 supervision could be done simultaneously when caregiving for ADL and IADL functions,  
37  
38  
39 146 or in other housekeeping for people without dementia and other family members.  
40  
41

### 42 147 *2.4. Cost estimation*

43  
44  
45 148 In this study, we identified three costs as follows: informal care costs, out-of-pocket  
46  
47  
48 149 payments for LTC services covered by insurance (copayments), and out-of-pocket  
49  
50  
51 150 payments for LTC services not covered by insurance. To calculate the informal care costs,  
52  
53  
54 151 there are two methods that are frequently used: the “opportunity cost” and “replacement  
55  
56  
57 152 cost” approaches [19–21]. With the opportunity cost approach it is assumed that there is  
58  
59  
60

1  
2  
3  
4  
5  
6 153 an alternative use of caregiving time (such as paid work) and thus estimates the costs due  
7  
8  
9 154 to this lost opportunity, whereas the replacement cost approach assumes that informal  
10  
11  
12 155 care services can be valued similarly to home care services provided by professional  
13  
14  
15 156 caregivers. Even though many previous studies on the economic valuation of informal  
16  
17  
18 157 care have used the replacement cost approach [20], the ‘opportunity cost approach’ is  
19  
20  
21 158 recommended by the developers of RUD for estimating informal care costs [2,5,22]. We  
22  
23  
24 159 used the opportunity cost approach to assess informal care time as forgone wages for  
25  
26  
27 160 caregivers [2,5,9]. We used caregivers’ monthly mean wages stratified by sex and age to  
28  
29  
30 161 value informal care. We assessed informal care costs for caregivers who were not working  
31  
32  
33 162 or who were over 65 years of age at 30% of the mean wage of employed caregivers [23–  
34  
35  
36 163 26]. A maximum daily informal care time of 16 hours was assumed, in order to allow for  
37  
38  
39 164 other activities such as cooking for other family members and sleep [12,27,28].  
40  
41  
42 165 Caregivers were asked to state their contribution to the total informal care in 5-point scale  
43  
44  
45 166 of 20%. In order to treat all caregivers as primary caregivers and estimate the costs  
46  
47  
48 167 associated with all informal care provided to a patient, we adjusted the informal care time  
49  
50  
51 168 by dividing its time by the median of these contribution levels, according to RUD  
52  
53  
54 169 instructions. This adjustment of informal care time was done only when calculating the  
55  
56  
57 170 informal care costs.  
58  
59  
60

1  
2  
3  
4  
5  
6  
7 171 Out-of-pocket payments for LTC services both covered and not covered by insurance  
8  
9  
10 172 were included in the questionnaire. We asked for these out-of-pocket payments through  
11  
12  
13 173 categories that were easy to answer (no payments, under JPY9,999, JPY10,000–24,999,  
14  
15  
16 174 JPY25,000–49,999, JPY50,000–74,999, JPY75,000–99,999, JPY100,000–124,999,  
17  
18  
19 175 JPY125,000–149,999, JPY150,000–299,999, JPY300,000–499,999, and over  
20  
21  
22 176 JPY500,000). We adjusted the answers by capping the upper limit of the limit amount  
23  
24  
25 177 (Care-needs level 1; JPY166,920, Care-needs level 5; JPY 360,650) depending on each  
26  
27  
28 178 care-needs level or each ratio of copayment (10% or 20%) if the answers were over it.

29  
30  
31 179 These costs were substituted by a median of each category, and we calculated the  
32  
33  
34 180 weighted average as the following formula: 
$$\frac{\sum_{i=0}^k (\text{median of category}_i) * n_i}{\sum n}$$

35  
36  
37 181 All costs were converted from Japanese yen to US dollars using the purchasing power  
38  
39  
40 182 parity rate in 2016 (¥102 = \$1) provided by the Organization for Economic Cooperation  
41  
42  
43 183 and Development.

#### 44 45 184 *2.5. Inclusion and exclusion criteria*

46  
47  
48 185 With respondents, we only focused on community settings for people with dementia  
49  
50  
51 186 who lived in their own home. We excluded respondents based on the following criteria:  
52  
53  
54 187 (1) people with dementia who were hospitalized or lived in nursing home, (2) lack of data  
55  
56  
57 188 about out-of-pocket payments for LTC services or care-needs levels, (3) contradictions  
58  
59  
60

1  
2  
3  
4  
5  
6 189 in relationships between caregivers and people with dementia, and (4) contradictions in  
7  
8  
9 190 care time (over 24 hours). When the age difference was less than 15 years and the person  
10  
11  
12 191 with dementia was a parent or child (not in-law), these cases were identified as  
13  
14  
15 192 contradictions.

### 18 193 *2.6. Statistical analysis*

20  
21 194 We conducted descriptive analysis for characteristics of people with dementia and  
22  
23  
24 195 caregivers. We then stratified the informal care time and dementia care costs by the care-  
25  
26  
27 196 needs level and cohabitation to test our hypothesis that high care-needs level or people  
28  
29  
30 197 who lives with caregivers need more informal care time. In this description, we didn't  
31  
32  
33 198 adjusted informal care time by caregivers' contribution rate.

34  
35  
36 199 Also, we used chi-square automatic interaction detection (CHAID) analysis to identify  
37  
38  
39 200 the characteristics of people with dementia and caregivers who needed more care services.

40  
41  
42 201 In CHAID analysis, the dependent variable would be divided into sub-groups by the most  
43  
44  
45 202 explanatory independent variables. These groups could be formed by any possible  
46  
47  
48 203 combination with all independent variables. Especially, we conducted an exhaustive  
49  
50  
51 204 CHAID analysis that repeats the trial until it finds the optimal combination of all  
52  
53  
54 205 independent variables. The CHAID dendograms provide a visual depiction of criteria and  
55  
56  
57 206 predictor variable interactions that might not be detected in traditional analytic procedures.  
58  
59  
60

1  
2  
3  
4  
5  
6 207 We set informal care costs, out-of-pocket payments for LTC services covered by  
7  
8  
9 208 insurance and out-of-pocket payments for LTC services not covered by insurance as  
10  
11  
12 209 dependent variables. Then, we used the characteristics of people with dementia (age, sex,  
13  
14  
15 210 care-need level, dementia types, ADL and IADL functions, and primary disease as the  
16  
17  
18 211 reason for care), the characteristics of caregivers (age, sex, marital status, children,  
19  
20  
21 212 cohabitation with people with dementia, visiting time, relationship to people with  
22  
23  
24 213 dementia, and occupation), and economic factors (the ratio of copayments for healthcare  
25  
26  
27 214 services and family income of caregivers). We treated the ratio of copayments for  
28  
29  
30 215 healthcare services as income proxy variable because this ratio was decided by income of  
31  
32  
33 216 people with dementia. We set the following criteria: tree depth was limited to three levels,  
34  
35  
36 217 no group smaller than 100 was split, no group smaller than 30 was formed, and the p-  
37  
38  
39 218 value for all statistical tests was under 0.05.

41  
42 219 All data were analyzed using IBM SPSS Statistics 23.0 for Windows (SPSS Japan Inc.,  
43  
44  
45 220 Tokyo, Japan).

#### 48 221 *2.6. Ethical considerations and consents*

51 222 This study was approved by the Ethics committee of Kyoto University Graduate School  
52  
53  
54 223 of Medicine (R0487). All participants were volunteers and they were informed that there  
55  
56  
57 224 was no obligation to participate in the study, and only people who consented to this study  
58  
59  
60

1  
2  
3  
4  
5  
6 225 completed the questionnaire.  
7  
8

9 226 *2.7. Patient and public involvement*  
10  
11

12 227 Patients were not formally involved in this study; however, their caregivers participated  
13  
14  
15 228 in our online-based questionnaire survey. Caregivers, who constituted the online panel,  
16  
17  
18 229 were sent the invitation by the Internet research company. Patients and their caregivers  
19  
20  
21 230 can view the results of this study when it is published in a peer-reviewed journal.  
22  
23

24 231 **3. Results**  
25  
26

27 232 *3.1. Characteristics of people with dementia and their caregivers*  
28  
29

30 233 A total of 3,916 caregivers answered the questionnaire. We focused only on people  
31  
32  
33 234 with dementia who lived in their own home (n=2277). However, we excluded the data  
34  
35  
36 235 according to the criteria and the final sample comprised 1,383 respondents (Figure 1).  
37  
38

39 236 Table 1 shows the characteristics of people with dementia and their caregivers. More  
40  
41  
42 237 than half of the people with dementia were female (66.7%), and the mean age was 81.8  
43  
44  
45 238 years. In contrast, more than half of the caregivers were male (61.7%), and the mean age  
46  
47  
48 239 was 52.2 years. 1,233 people (89.2%) responded that ADL functions such as meals and  
49  
50  
51 240 toilet use could be managed by themselves, while IADL functions such as cleaning and  
52  
53  
54 241 shopping could be done by one person in the same way. There were only 788 people  
55  
56  
57 242 (57.0%) who did the latter by themselves.  
58  
59  
60

1  
2  
3  
4  
5  
6 243 *3.2. Informal care time and costs of dementia care*  
7  
8

9 244 The mean daily informal care time was 9.36 hours in total. The time for only ADL was  
10  
11  
12 245 4.97 hours and for only IADL was 4.39 hours. On the other hand, monthly informal care  
13  
14  
15 246 time (ADL+IADL) was 166.32 hours. Table 2 shows the differences in daily informal  
16  
17  
18 247 care time and personal cost of dementia care among the care-need levels. In this table, we  
19  
20  
21 248 didn't adjust by contribution rate. Informal care times increased with care-needs levels,  
22  
23  
24 249 especially in ADL. Out-of-pocket payments for LTC services were less than informal  
25  
26  
27 250 care costs in all of the care-needs levels.  
28

29  
30 251

31  
32 252 *3.3. Classification with classification trees*  
33  
34

35 253 Figure 2 shows the results of CHAID analysis for informal care costs. Informal care  
36  
37  
38 254 costs were related to caregivers' employment status, cohabitation, age, and care-needs  
39  
40  
41 255 levels or ADL function of people with dementia. When the caregiver acquired family care  
42  
43  
44 256 leave, informal care cost was the highest (node 2). For the caregivers who were between  
45  
46  
47 257 43-52 years old (node 12) and worked outside the home as well as cohabited with people  
48  
49  
50 258 with dementia, informal care costs were high, similar to caregivers who acquired family  
51  
52  
53 259 care leave (node 2). Even if the caregiver did not work, informal care costs were higher  
54  
55  
56 260 with high care-needs levels (node 6-8). The costs for cohabiting caregivers (node 5) were  
57  
58  
59 261 higher than for those not cohabiting (node 4). For those not cohabiting and the person  
60



1  
2  
3  
4  
5  
6 262 with dementia could not walk without assistance (node 9), informal care costs were higher  
7  
8  
9 263 than for those that could walk (node 10) .  
10

11  
12 264 Out-of-pocket payments for LTC services covered by insurance were related to care-  
13  
14  
15 265 need levels, ADL or IADL functions, sex (both the people with dementia and caregivers)  
16  
17  
18 266 and caregivers' household incomes (Figure 3). Especially, if the people with dementia  
19  
20  
21 267 could bathe or use the toilet by themselves, out-of-pocket payments would be about 65%  
22  
23  
24 268 lower (nodes 9-10, 15-18). On the other hand, if out-of-pocket payments were not covered  
25  
26  
27 269 by insurance, they were related to caregivers' household incomes, income proxy variable,  
28  
29  
30 270 ADL or IADL functions of people with dementia, and age of people with dementia  
31  
32  
33 271 (Figure 4). Both the out-of-pocket payments that were covered by insurance and those  
34  
35  
36 272 that were not were related to caregivers' house hold income or ADL functions which  
37  
38  
39 273 affected the ability to pay and service use volume.  
40

41  
42 274

#### 43 44 275 **4. Discussion**

45  
46  
47 276 In this study, we first demonstrated that informal care time for ADL or IADL functions  
48  
49  
50 277 increased with high care-needs levels as our hypothesis stipulated (Care-need level 1:  
51  
52  
53 278 2.2hours, level 3: 3.4 hours. level 5: 4.6 hours). Second, we established that the  
54  
55  
56 279 combination of characteristics of both people with dementia and their caregivers were  
57  
58  
59 280 related to dementia care costs through the classification tree analysis. Caregivers'  
60

1  
2  
3  
4  
5  
6 281 employment and cohabitation status were mainly related to informal care costs, and the  
7  
8  
9 282 costs were the highest when caregivers took nursing care leave, which caregivers leave  
10  
11  
12 283 work due to caregiving. Furthermore, when caregivers worked at an occupation and lived  
13  
14  
15 284 separately, or the people with dementia could not walk, the costs doubled. Out-of-pocket  
16  
17  
18 285 payments for LTC services covered by insurance were mainly related to care-need levels  
19  
20  
21 286 and ADL and IADL functions. In the case of low care-needs levels, where care was  
22  
23  
24 287 needed for toileting or bathing, high out-of-pocket payments were required for LTC  
25  
26  
27 288 insurance services. On the other hand, out-of-pocket payments were related to caregivers'  
28  
29  
30 289 household income levels or income proxy variable. Caregivers with high annual incomes  
31  
32  
33 290 (more than \$117,648 US) made out-of-pocket payments for dementia care of full amounts  
34  
35  
36 291 that were two to five times more than others.

37  
38  
39 292 Informal care costs were mainly related to caregivers' characteristics such as  
40  
41  
42 293 employment or cohabitation status in the classification tree, which illustrated related  
43  
44  
45 294 factors by order of precedence. In many previous studies, ADL functions or dementia  
46  
47  
48 295 severity were explained as related factors in regression models [9–12]. Some studies  
49  
50  
51 296 showed caregivers' characteristics such as employment status were related to informal  
52  
53  
54 297 care costs [9,29,30], but few studies considered all of the caregivers' characteristics. Thus,  
55  
56  
57 298 caregiver factors may be as important as factors related to people with dementia are.  
58  
59  
60

1  
2  
3  
4  
5  
6 299 Furthermore, we considered the combination of characteristics of both people with  
7  
8  
9 300 dementia and their caregivers. For example, informal care costs doubled when caregivers  
10  
11  
12 301 lived separately and people with dementia could not walk. Many previous studies  
13  
14  
15 302 established the determinants by regression analysis[9,12,31–34]. Although it is possible  
16  
17  
18 303 to understand the influence on the objective variable adjusted in the multivariate by  
19  
20  
21 304 regression analysis, the combinations between explanatory variables have not been  
22  
23  
24 305 clarified. CHAID analysis provided the classification only for related characteristics in  
25  
26  
27 306 the outcome. Such combinations suggest that support should be provided to caregivers  
28  
29  
30 307 who cannot live with people with dementia or caregivers who are not employed (Figure  
31  
32  
33 308 2, Node 3-4).

34  
35  
36 309 The association between out-of-pocket payments for LTC services covered by  
37  
38  
39 310 insurance and care-need levels is reasonable because the benefit limit standard amounts  
40  
41  
42 311 for formal care services at home are decided in relation to care-need levels[35]. In  
43  
44  
45 312 addition, when people with dementia had a high care-needs level and their caregiver's  
46  
47  
48 313 household income was high, out-of-pocket payments were high. Because the  
49  
50  
51 314 determination of service usage within the limit amount is a free contract, people with  
52  
53  
54 315 dementia and their caregivers may decide how they use formal care services depending  
55  
56  
57 316 on how much they can pay for services. High care-needs levels [36], age[10,34,36,37]  
58  
59  
60

1  
2  
3  
4  
5  
6 317 and sex[10,36] were related to the high costs of LTC services. Even for low care-needs  
7  
8  
9 318 levels, the cost may be high when people with dementia need assistance with bathing or  
10  
11  
12 319 toileting. This was affected by LTC insurance services providing specific substitutions,  
13  
14  
15 320 such as bath assistance, and also Ku et al.'s or Dodel et al.'s ADL functions were related  
16  
17  
18 321 to the social care costs[9,30].  
19

20  
21 322 Similarly, economic variables such as household income and income proxy variable  
22  
23  
24 323 were mainly related to out-of-pocket payments for LTC services not covered by insurance  
25  
26  
27 324 (Figure 4). This is because people must pay the full amount if they use LTC services  
28  
29  
30 325 without insurance. In the United States, high copayments are required for the use of LTC  
31  
32  
33 326 services; however, these copayments were related to age, sex, and comorbidities in the  
34  
35  
36 327 cohort study [37]. A part of the result of Hurd et al. was similar to our results in the case  
37  
38  
39 328 of the payments that were covered by insurance for the use of LTC services. Out-of-  
40  
41  
42 329 pocket payments not covered by insurance might occur for over the limit standard  
43  
44  
45 330 amounts or the use of LTC services not covered by insurance (e.g. feeding service[38]).  
46  
47  
48 331 According to the questionnaire responses, people tended to pay for expendables such as  
49  
50  
51 332 diapers, employment of housekeepers, and home repair such as handrail installation as  
52  
53  
54 333 out-of-pocket payments not covered by LTC insurance. Furthermore, except when  
55  
56  
57 334 caregivers' income was high, the cost did not change significantly due to differences in  
58  
59  
60

1  
2  
3  
4  
5  
6 335 ADL and IADL functions as it did for the payments that were covered by insurance.  
7  
8

9 336 These application examples were not really affected by ADL or IADL functions.  
10  
11

12 337 From the viewpoint of independent variables, if people with dementia lacked some  
13  
14

15 338 ADL function, then costs might be higher but in the case of IADL functions this was  
16  
17

18 339 reversed. There is a possibility that some services are used to support the independent  
19  
20

21 340 lives of people with dementia. Some people with dementia who can do housework by  
22  
23

24 341 themselves might move or walk around more, and therefore use more LTC services like  
25  
26

27 342 commuting for care (day service) or commuting for rehabilitation. Also, care-need levels  
28  
29

30 343 were not related to out-of-pocket payments not covered by insurance. The above  
31  
32

33 344 application examples were also not related to care-needs levels. The relationship of  
34  
35

36 345 cohabitation or employment status was the same as in previous studies [9,29,32]. While  
37  
38

39 346 differences of burden of dementia care depended on the dementia types that existed and  
40  
41

42 347 were pointed out [24], dementia types were not related to any other factors in this study.  
43  
44

45 348 In our CHAID analysis, family caregivers' economic status or severity (care-needs levels)  
46  
47

48 349 might have been more important than dementia types to dementia care costs. In creating  
49  
50

51 350 policy for LTC services in an aging society, we must understand the actual conditions  
52  
53

54 351 from not only a societal but also a personal perspective. This is true even if from a societal  
55  
56

57 352 viewpoint, the societal cost of dementia care in the community has been established by  
58  
59  
60

1  
2  
3  
4  
5  
6 353 other countries to be greater than that in institutional care [39]. Furthermore, we need a  
7  
8  
9 354 wide range of perspectives of stakeholders to discuss the dementia care system, while  
10  
11  
12 355 almost all studies of economic burden of dementia stood on societal or payers'  
13  
14  
15 356 viewpoint[7,19–21]. Then, as a first step, we need to understand what people with  
16  
17  
18 357 dementia and their family caregivers are already spending too much money on. We need  
19  
20  
21 358 to recognize the complicated combination of characteristics associated with people with  
22  
23  
24 359 dementia and their caregivers. To this point, the results of this classification could be  
25  
26  
27 360 useful to understanding which situation requires more resources depending on cost types.  
28  
29  
30 361 Our results may suggest that a sustainable dementia care system in Japan should be  
31  
32  
33 362 reconstructed from a personal viewpoint.

36 363 There are some limitations to this study. First, we conducted an online questionnaire  
37  
38  
39 364 survey with caregivers of people with dementia. Traditionally, respondents who use the  
40  
41  
42 365 Internet tend to be male and relatively young, reflecting the general characteristics of  
43  
44  
45 366 online research [40–42]. The sample may therefore not be representative of all caregivers  
46  
47  
48 367 because the sample is limited to those who have access to the Internet and are registered  
49  
50  
51 368 with an Internet research company [43]. Certainly, we cannot extrapolate the  
52  
53  
54 369 representative value in each node of the CHAID tree to the population as a whole.  
55  
56  
57 370 However, this study focused on finding a combination of independent variables related to  
58  
59  
60

1  
2  
3  
4  
5  
6 371 the dependent variables (informal care cost and financial burden), taking into account the  
7  
8  
9 372 interaction between multiple independent variables. The significance of subgroups made  
10  
11  
12 373 by combinations of variables may not change significantly even if the population changes.  
13  
14  
15 374 Therefore, in this study, influence due to the difference between this sample and general  
16  
17  
18 375 public is not considered to be a practical problem. However, further research (e.g. a  
19  
20  
21 376 paper-based questionnaire survey mailed to the family caregivers association) to collect  
22  
23  
24 377 representative samples might be needed in the future. Second, it was impossible to  
25  
26  
27 378 measure the response rate in this study. Samples were collected from an online panel  
28  
29  
30 379 until the target number set in each age category was achieved. Third, we didn't consider  
31  
32  
33 380 the subjective burden of care and depressive symptoms. These mental burdens are  
34  
35  
36 381 considered to be important factors in explaining the actual state of care costs, and many  
37  
38  
39 382 previous studies in Japan have covered subjective costs [44–46]. In the future, in addition  
40  
41  
42 383 to the burden of time and money, it would be preferable to measure subjective burdens.  
43  
44  
45 384 Fourth, we estimated informal care costs only by the opportunity cost approach. Some  
46  
47  
48 385 studies indicated results estimated by both opportunity cost approach and replacement  
49  
50  
51 386 cost approach. The opportunity cost approach might be underestimated in comparison to  
52  
53  
54 387 the replacement approach[9,37]

55  
56  
57 388  
58  
59  
60

1  
2  
3  
4  
5  
6 389 **Conclusions**

7  
8  
9 390 This study clarified the difference in dementia care costs between classified subgroups  
10  
11  
12 391 by considering the combination of the situations of both people with dementia and their  
13  
14  
15 392 caregivers. Informal care costs were related to caregivers' employment and cohabitation  
16  
17  
18 393 status rather to the situation of people with dementia. On the other hand, out-of-pocket  
19  
20  
21 394 payments for long-term care services were related to care-needs levels and family  
22  
23  
24 395 economic status. These classifications will be useful in understanding which situation  
25  
26  
27 396 represents a greater economic burden, and helpful in improving the sustainability of the  
28  
29  
30 397 dementia care system in Japan.

31  
32  
33 398

34  
35  
36 399 **Footnotes**

37  
38  
39 400 *Abbreviations*

40  
41  
42 401 LTC: Long-Term Care

43  
44  
45 402 RUD: Resource Utilization in Dementia

46  
47  
48 403 ADL: Activities of Daily Life

49  
50  
51 404 IADL: Instrumental Activities of Daily Life

52  
53  
54 405 CHAID analysis: chi-square automatic interaction detection analysis  
55  
56  
57  
58  
59  
60



1  
2  
3  
4  
5  
6 406 *Authors' contribution*

7  
8  
9 407 TN, SN and YI designed the study. All authors discussed for preparing the questionnaire.

10  
11  
12 408 TN mainly analyzed all data, and HU, SK, AW and YI advised for analysis. TN prepared

13  
14  
15 409 the draft of the manuscript, then all authors contributed to rewrite it. All authors read and

16  
17  
18 410 approved the final manuscript.

19  
20  
21 411 *Funding sources*

22  
23  
24 412 This study was financially supported by a Health Sciences Research Grant from the

25  
26  
27 413 Ministry of Health, Labour and Welfare of Japan (H27-ninntishou-ippan-001), the Japan

28  
29  
30 414 Foundation for Aging and Health (H27), and a Grant-in-Aid for Scientific Research from

31  
32  
33 415 the Japan Society for the Promotion of Science ([A]16H02634). The funders had no role

34  
35  
36 416 in the study design, data collection and analysis, decision to publish, or preparation of the

37  
38  
39 417 manuscript.

40  
41  
42 418 *Competing interest*

43  
44  
45 419 None declared.

46  
47  
48 420 *Acknowledgements*

49  
50  
51 421 None.

52  
53  
54 422 *Conflicts of interest*

55  
56  
57 423 None.

1  
2  
3  
4  
5  
6  
7  
8  
9  
10  
11  
12  
13  
14  
15  
16  
17  
18  
19  
20  
21  
22  
23  
24  
25  
26  
27  
28  
29  
30  
31  
32  
33  
34  
35  
36  
37  
38  
39  
40  
41  
42  
43  
44  
45  
46  
47  
48  
49  
50  
51  
52  
53  
54  
55  
56  
57  
58  
59  
60

424 *Data sharing statement*

425 No additional data are available.

426

For peer review only

427 **References**

- 428 1 Ninomiya T, Kiyohara Y, Obara T, *et al.* A study on future estimation of the  
429 elderly population of dementia in Japan Grant-in-Aid for Scientific Research for  
430 Ministru of Health, Labor and Welfare in 2014( H26-Tokubetsu-Shitei-036).  
431 2014. [https://mhlw-](https://mhlw-grants.niph.go.jp/niph/search/NIDD00.do?resrchNum=201405037A)  
432 [grants.niph.go.jp/niph/search/NIDD00.do?resrchNum=201405037A](https://mhlw-grants.niph.go.jp/niph/search/NIDD00.do?resrchNum=201405037A)
- 433 2 Prince M, Wimo A, Guerchet M, *et al.* World Alzheimer Report 2015: the global  
434 impact of dementia. 2015. <https://www.alz.co.uk/research/world-report-2015>  
435 (accessed 3 Apr 2016).
- 436 3 Wimo A, Jönsson L, Fratiglioni L, *et al.* The societal costs of dementia in  
437 Sweden 2012 - relevance and methodological challenges in valuing informal  
438 care. *Alzheimers Res Ther* 2016;**8**:59. doi:10.1186/s13195-016-0215-9
- 439 4 Wimo A, Strauss E Von, Nordberg G. Time spent on informal and formal care  
440 giving for persons with dementia in Sweden. *Heal Po* 2002;**61**:255–68.
- 441 5 Wimo A, Prince M. World Alzheimer Report 2010 THE GLOBAL ECONOMIC  
442 IMPACT OF DEMENTIA.  
443 2010. [https://www.alz.co.uk/research/files/WorldAlzheimerReport2010Executive](https://www.alz.co.uk/research/files/WorldAlzheimerReport2010ExecutiveSummary.pdf)  
444 [Summary.pdf](https://www.alz.co.uk/research/files/WorldAlzheimerReport2010ExecutiveSummary.pdf) (accessed 3 Apr 2016).
- 445 6 Wimo A, Ali G, Wu Y, *et al.* The worldwide costs of dementia 2015 and

- 1  
2  
3  
4  
5  
6 446 comparisons with 2010. *Alzheimer's Dement* 2016;:1–7.  
7  
8  
9 447 doi:10.1016/j.jalz.2016.07.150  
10  
11  
12 448 7 Jönsson L, Lin P-J, Khachaturian AS. Special topic section on health economics  
13  
14  
15 449 and public policy of Alzheimer's disease. *Alzheimer's Dement* 2017;**13**:201–4.  
16  
17  
18 450 doi:10.1016/j.jalz.2017.02.004  
19  
20  
21 451 8 Nakabe T, Sasaki N, Uematsu H, *et al*. The personal cost of dementia care in  
22  
23  
24 452 Japan: A comparative analysis of residence types. *Int J Geriatr Psychiatry*  
25  
26  
27 453 2018;**33**:1243–52. doi:10.1002/gps.4916  
28  
29  
30 454 9 Ku L-JE, Pai M-C, Shih P-Y. Economic Impact of Dementia by Disease  
31  
32  
33 455 Severity: Exploring the Relationship between Stage of Dementia and Cost of  
34  
35  
36 456 Care in Taiwan. *PLoS One* 2016;**11**:e0148779.  
37  
38  
39 457 doi:10.1371/journal.pone.0148779  
40  
41  
42 458 10 Leicht H, Heinrich S, Heider D, *et al*. Net costs of dementia by disease stage.  
43  
44  
45 459 *Acta Psychiatr Scand* 2011;**124**:384–95. doi:10.1111/j.1600-0447.2011.01741.x  
46  
47  
48 460 11 Leicht H, König H-H, Stuhldreher N, *et al*. Predictors of Costs in Dementia in a  
49  
50  
51 461 Longitudinal Perspective. *PLoS One* 2013;**8**:e70018.  
52  
53  
54 462 doi:10.1371/journal.pone.0070018  
55  
56  
57 463 12 Farré M, Haro JM, Kostov B, *et al*. Direct and indirect costs and resource use in  
58  
59  
60

- 1  
2  
3  
4  
5  
6 464 dementia care: A cross-sectional study in patients living at home. *Int J Nurs Stud*  
7  
8  
9 465 2016;**55**:39–49.  
10  
11  
12 466 13 Ministry of Internal Affairs and Communications. Survey on Time Use and  
13  
14  
15 467 Leisure Activities in 2016. 2017.  
16  
17  
18 468 <http://www.stat.go.jp/data/shakai/2016/pdf/gaiyou2.pdf> (accessed 6 Mar 2018).  
19  
20  
21 469 14 Wimo A, Jonsson L, Zbrozek A. The Resource Utilization in Dementia (RUD)  
22  
23  
24 470 instrument is valid for assessing informal care time in community-living patients  
25  
26  
27 471 with dementia. *J Nutr Health Aging* 2010;**14**:685–  
28  
29  
30 472 90.<http://www.ncbi.nlm.nih.gov/pubmed/20922346> (accessed 3 Feb 2016).  
31  
32  
33 473 15 Wimo A, Gustavsson A, Jonsson L, *et al.* Application of resource utilization in  
34  
35  
36 474 dementia (RUD) instrument in a global setting. *Alzheimer's Dement* 2013;**9**:429–  
37  
38  
39 475 35. doi:10.1016/j.jalz.2012.06.008  
40  
41  
42 476 16 Mesterton J, Wimo A, By A, *et al.* Cross sectional observational study on the  
43  
44  
45 477 societal costs of Alzheimer's disease. *Curr Alzheimer Res* 2010;**7**:358–  
46  
47  
48 478 67.<http://www.ncbi.nlm.nih.gov/pubmed/19939223> (accessed 11 Jun 2018).  
49  
50  
51 479 17 Ministry of Health Labour and Welfare. Mechanism and procedures for  
52  
53  
54 480 cartification of care-needs levels. <https://www.mhlw.go.jp/file/05-Shingikai->  
55  
56  
57 481 11901000-Koyoukintoujidoukateikyoku-Soumuka/0000126240.pdf (accessed 12  
58  
59  
60

- 1  
2  
3  
4  
5  
6 482 Feb 2019).
- 7  
8  
9 483 18 Lin H-R, Otsubo T, Imanaka Y. Survival analysis of increases in care needs  
10  
11  
12 484 associated with dementia and living alone among older long-term care service  
13  
14  
15 485 users in Japan. *BMC Geriatr* 2017;**17**:182. doi:10.1186/s12877-017-0555-8  
16  
17
- 18 486 19 Mauskopf J, Mucha L. A Review of the Methods Used to Estimate the Cost of  
19  
20  
21 487 Alzheimer ' s Disease in the United States. *Am J Alzheimer ' s Dis Other*  
22  
23  
24 488 *Dementias* 2011;**26**:298–309. doi:10.1177/1533317511407481  
25  
26
- 27 489 20 Quentin W, Sg R, Luppia M, *et al.* Cost-of-illness studies of dementia : a  
28  
29  
30 490 systematic review focusing on stage dependency of costs. *Acta Psychiatr Scand*  
31  
32  
33 491 2010;**121**:243–59. doi:10.1111/j.1600-0447.2009.01461.x  
34  
35
- 36 492 21 Schaller S, Mauskopf J, Kriza C, *et al.* The main cost drivers in dementia : a  
37  
38  
39 493 systematic review. *Int J Geriatr Psychiatry* 2015;**30**:111–29.  
40  
41  
42 494 doi:10.1002/gps.4198  
43  
44
- 45 495 22 Wimo A, Winblad B, Jönsson L. An estimate of the total worldwide societal  
46  
47  
48 496 costs of dementia in 2005. *Alzheimer ' s Dement* 2007;**3**:81–91.  
49  
50  
51 497 doi:10.1016/j.jalz.2007.02.001  
52  
53
- 54 498 23 Johannesson M, Borgquis L, Jönsson B, *et al.* The costs of treating hypertension -  
55  
56  
57 499 an analysis of different cut-off points. *Health Policy (New York)* 1991;**18**:141–  
58  
59  
60

- 1  
2  
3  
4  
5  
6 500 50. doi:10.1016/0168-8510(91)90095-F  
7  
8  
9 501 24 Costa N, Ferlicq L, Derumeaux-burel H, *et al.* Comparison of Informal Care  
10  
11  
12 502 Time and Costs in Different Age-Related Dementias : A Review. *Biomed Res Int*  
13  
14  
15 503 2013;**2013**:1–15.  
16  
17  
18 504 25 Åkerborg Ö, Lang A, Wimo A, *et al.* Cost of Dementia and Its Correlation With  
19  
20  
21 505 Dependence. *J Aging Health* Published Online First: 26 January 2016.  
22  
23  
24 506 doi:10.1177/0898264315624899  
25  
26  
27 507 26 Bergvall N, Brinck P, Eek D, *et al.* Relative importance of patient disease  
28  
29  
30 508 indicators on informal care and caregiver burden in Alzheimer ' s disease. *Int*  
31  
32  
33 509 *Psychogeriatrics* 2011;:73–85. doi:10.1017/S1041610210000785  
34  
35  
36 510 27 Rattinger G, Schwartz S, Mullins C, *et al.* Dementia severity and the longitudinal  
37  
38  
39 511 costs of informal care in the Cache County population. *Alzheimer's Dement*  
40  
41  
42 512 2015;**11**:946–54.  
43  
44  
45 513 28 Gustavsson A, Brinck P, Bergvall N, *et al.* Predictors of costs of care in  
46  
47  
48 514 Alzheimer's disease: a multinational sample of 1222 patients. *Alzheimers Dement*  
49  
50  
51 515 2011;**7**:318–27. doi:10.1016/j.jalz.2010.09.001  
52  
53  
54 516 29 Gervès C, Chauvin P, Bellanger MM. Evaluation of full costs of care for patients  
55  
56  
57 517 with Alzheimer ' s disease in France : The predominant role of informal care.  
58  
59  
60

- 1  
2  
3  
4  
5  
6 518 *Health Policy (New York)* 2014;**116**:114–22. doi:10.1016/j.healthpol.2014.01.001
- 7  
8  
9 519 30 Dodel R, Belger M, Reed C, *et al.* Determinants of societal costs in Alzheimer’s  
10  
11  
12 520 disease: GERAS study baseline results. *Alzheimers Dement* 2015;**11**:933–45.  
13  
14  
15 521 doi:10.1016/j.jalz.2015.02.005
- 16  
17  
18 522 31 Hurd MD, Martorell P, Delavande A, *et al.* Monetary Costs of Dementia in the  
19  
20  
21 523 United States. *N Engl J Med* 2013;**368**:1326–34. doi:10.1056/NEJMsa1204629
- 22  
23  
24 524 32 Dodel R, Belger M, Reed C, *et al.* Determinants of societal costs in Alzheimer’s  
25  
26  
27 525 disease. *Alzheimer’s Dement* 2015;**11**:933–45.
- 28  
29  
30 526 33 Peña-Longobardo L, Oliva-moreno J. Economic valuation and determinants of  
31  
32  
33 527 informal care to people with Alzheimer ’ s disease. *Eur J Heal Econ*  
34  
35  
36 528 2015;**16**:507–15. doi:10.1007/s10198-014-0604-6
- 37  
38  
39 529 34 André Hajek , Christian Brettschneider, Annette Ernst, Tina Posselt, Birgitt  
40  
41  
42 530 Wiese, Jana Prokein, Siegfried Weyerer, Jochen Werle, Angela Fuchs et al.  
43  
44  
45 531 Longitudinal predictors of informal and formal caregiving time in community-  
46  
47  
48 532 dwelling dementia patients. *Soc Psychiatry Psychiatr Epidemiol* 2015;:1–10.
- 49  
50  
51 533 35 Tokyo Metropolitan Government. *The Long-term Care Insurance System : Long-*  
52  
53  
54 534 *term Care Service Costs to Be Paid by th User.*
- 55  
56  
57 535 [http://www.fukushihoken.metro.tokyo.jp/kourei/koho/kaigo\\_pamph.files/p.10kai](http://www.fukushihoken.metro.tokyo.jp/kourei/koho/kaigo_pamph.files/p.10kai)  
58  
59  
60



- 1  
2  
3  
4  
5  
6 536 gohoken-english.pdf (accessed 12 Feb 2019).  
7  
8  
9 537 36 Huei-Ru Lin, Tetsuya Otsubo and YI. The Effects of Dementia and Long-Term  
10  
11  
12 538 Care Services on the Deterioration of Care-needs Levels of the Elderly in Japan.  
13  
14  
15 539 *Medicine (Baltimore)* 2015;**94**:1–7.  
16  
17  
18 540 37 Michael D. Hurd, Paco Martorell, Adeline Delavande, Kathleen J. Mullen and  
19  
20  
21 541 KML. Monetary Costs of Dementia in the United States. *N Engl J Med*  
22  
23  
24 542 2013;**368**:1326–34. doi:10.1056/NEJMsa1204629.Monetary  
25  
26  
27 543 38 Ministry of Health Labour and Welfare. Reference case examples of long-term  
28  
29  
30 544 care insurance services for constructing community-based integrated care system.  
31  
32  
33 545 2016. <https://www.mhlw.go.jp/file/06-Seisakujouhou-12300000->  
34  
35  
36 546 [Roukenkyoku/guidebook-bunkatu1.pdf](https://www.mhlw.go.jp/file/06-Seisakujouhou-12300000-Roukenkyoku/guidebook-bunkatu1.pdf) (accessed 12 Feb 2019).  
37  
38  
39 547 39 König H, Leicht H, Brettschneider C, *et al.* The Costs of Dementia From the  
40  
41  
42 548 Societal Perspective : Is Care Provided in the Community Really Cheaper than  
43  
44  
45 549 Nursing Home Care ? *JAMDA* 2014;**15**:117–26.  
46  
47  
48 550 doi:10.1016/j.jamda.2013.10.003  
49  
50  
51 551 40 Eysenbach G. Improving the quality of Web surveys: the Checklist for Reporting  
52  
53  
54 552 Results of Internet E-Surveys (CHERRIES). *J Med Internet Res* 2004;**6**:e34.  
55  
56  
57 553 doi:10.2196/jmir.6.3.e34  
58  
59  
60

- 1  
2  
3  
4  
5  
6 554 41 Eysenbach G, Wyatt J. Using the Internet for Surveys and Health Research. *J*  
7  
8  
9 555 *Med Internet Res* 2002;**4**:e13. doi:10.2196/jmir.4.2.e13  
10  
11  
12 556 42 Fujihara S, Inoue A, Kubota K, *et al.* Caregiver Burden and Work Productivity  
13  
14  
15 557 Among Japanese Working Family Caregivers of People with Dementia. *Int J*  
16  
17  
18 558 *Behav Med* 2018;**1**–11. doi:10.1007/s12529-018-9753-9  
19  
20  
21 559 43 van Gelder MMHJ, Bretveld RW, Roeleveld N. Web-based Questionnaires: The  
22  
23  
24 560 Future in Epidemiology? *Am J Epidemiol* 2010;**172**:1292–8.  
25  
26  
27 561 doi:10.1093/aje/kwq291  
28  
29  
30 562 44 Washio S, Toyoshima Y, Yamazaki R, *et al.* [Factors related to the care burden  
31  
32  
33 563 of family caregivers - focusing on the care burden of caregivers of elderly who  
34  
35  
36 564 needs nursing care -]. *Japanese J Clin Exp Med = Rinshou to Kenkyuu*  
37  
38  
39 565 2012;**89**:1687–91.  
40  
41  
42 566 45 Arai Y, Kumamoto K, Mizuno Y, *et al.* Depression among family caregivers of  
43  
44  
45 567 community-dwelling older people who used services under the Long Term Care  
46  
47  
48 568 Insurance program: a large-scale population-based study in Japan. *Aging Ment*  
49  
50  
51 569 *Health* 2014;**18**:81–91. doi:10.1080/13607863.2013.787045  
52  
53  
54 570 46 Washio S, Nogami Y, Motoyama S, *et al.* [Long-Term Care Insurance Act  
55  
56  
57 571 amendment and care burden of family caregivers for elderly who need long-term  
58  
59  
60

1  
2  
3  
4  
5  
6 572 care at home]. *Japanese J Clin Exp Med = Rinshou to Kenkyuu* 2015;**92**:75–9.  
7  
8

9 573  
10  
11  
12  
13  
14  
15  
16  
17  
18  
19  
20  
21  
22  
23  
24  
25  
26  
27  
28  
29  
30  
31  
32  
33  
34  
35  
36  
37  
38  
39  
40  
41  
42  
43  
44  
45  
46  
47  
48  
49  
50  
51  
52  
53  
54  
55  
56  
57  
58  
59  
60

For peer review only

1  
2  
3  
4  
5  
6  
7 **Figure 1: Selection process for the analysis**

8  
9 This diagram shows the flow of participants who we focused on.  
10

11  
12 **Figure 2: Classification tree of chi-square automatic interaction detection for**  
13 **informal care costs**  
14  
15

16  
17 The dendogram illustrates the combinations of independent variables to clarify who need  
18 or provide more informal care.  
19  
20

21  
22 Abbreviations: ADL, Activities of Daily Living; IADL, Instrumental Activities of Daily  
23 Living; SD, Standard deviation; LTC, Long-term care  
24  
25  
26  
27  
28

29  
30 **Figure 3: Classification tree of chi-square automatic interaction detection for out-**  
31 **of-pocket payments for LTC services covered by insurance**  
32  
33

34  
35 The dendogram illustrates the combinations of independent variables to clarify who need  
36 more LTC insurance services.  
37  
38

39  
40 Abbreviations: ADL, Activities of Daily Living; IADL, Instrumental Activities of Daily  
41 Living; SD, Standard deviation; LTC, Long-term care  
42  
43  
44  
45  
46  
47

48 **Figure 4: Classification tree of chi-square automatic interaction detection for out-**  
49 **of-pocket payments for LTC services not covered by insurance**  
50  
51

52  
53 The dendogram illustrates the combinations of independent variables to clarify who need  
54 more LTC services without insurance.  
55  
56  
57  
58  
59  
60

1  
2  
3  
4  
5  
6 Abbreviations: ADL, Activities of Daily Living; IADL, Instrumental Activities of Daily  
7  
8  
9 Living; SD, Standard deviation; LTC, Long-term care  
10  
11  
12  
13  
14  
15  
16  
17  
18  
19  
20  
21  
22  
23  
24  
25  
26  
27  
28  
29  
30  
31  
32  
33  
34  
35  
36  
37  
38  
39  
40  
41  
42  
43  
44  
45  
46  
47  
48  
49  
50  
51  
52  
53  
54  
55  
56  
57  
58  
59  
60

For peer review only

**Table 1 Characteristics of people with dementia and caregivers**

| <b>People with Dementia</b>                       |  | N=1383     |
|---------------------------------------------------|--|------------|
| Age, mean±SD, y                                   |  | 81.8±10.3  |
| Sex, n (%)                                        |  |            |
| Female                                            |  | 922 (66.7) |
| Male                                              |  | 461 (33.3) |
| Care-needs level, n (%)                           |  |            |
| Support-Needs Level 1-2                           |  | 253 (18.3) |
| Care-Needs Level 1                                |  | 310 (22.4) |
| Care-Needs Level 2                                |  | 335 (24.2) |
| Care-Needs Level 3                                |  | 258 (18.7) |
| Care-Needs Level 4                                |  | 122 (8.8)  |
| Care-Needs Level 5                                |  | 105 (7.6)  |
| ADL/IADL functional capabilities                  |  |            |
| ADL score (0-6), mean±SD                          |  | 3.2±2.0    |
| IADL score (0-7), mean±SD                         |  | 1.3±1.6    |
| Ratio of copayments for healthcare services, n(%) |  |            |
| 10%                                               |  | 961 (69.5) |
| 20%                                               |  | 137 (9.9)  |
| 30%                                               |  | 157 (11.4) |
| Unknown                                           |  | 128 (9.3)  |
| <b>Types of Dementia, n(%)</b>                    |  |            |
| Alzheimer's disease                               |  | 751 (54.3) |
| <b>Caregivers</b>                                 |  |            |
| Age, mean ± SD                                    |  | 52.2±13.1  |
| Sex, n (%)                                        |  |            |
| Female                                            |  | 530 (38.3) |
| Male                                              |  | 853 (61.7) |
| Relationship, n (%)                               |  |            |
| Mother                                            |  | 575 (41.6) |
| Mother-in-law                                     |  | 169 (12.2) |
| Father                                            |  | 288 (20.8) |
| Father-in-law                                     |  | 90 (6.5)   |
| Spouse                                            |  | 99 (7.2)   |
| Sibling                                           |  | 11 (0.8)   |
| Child                                             |  | 10 (0.7)   |
| Friend                                            |  | 5 (0.4)    |
| Other (including grandparents)                    |  | 136 (9.8)  |
| Contribution level for caregiving, n (%)          |  |            |
| 1-20%                                             |  | 395 (28.6) |
| 21-40%                                            |  | 355 (25.7) |
| 41-60%                                            |  | 241 (17.4) |
| 61-80%                                            |  | 166 (12.0) |
| 81-100%                                           |  | 226 (16.3) |
| Currently employed, n (%)                         |  | 532 (38.5) |

SD: Standard deviation, ADL: Activities of Daily Living, IADL: Instrumental Activities

of Daily Living

For peer review only

1  
2  
3  
4  
5  
6  
7  
8  
9  
10  
11  
12  
13  
14  
15  
16  
17  
18  
19  
20  
21  
22  
23  
24  
25  
26  
27  
28  
29  
30  
31  
32  
33  
34  
35  
36  
37  
38  
39  
40  
41  
42  
43  
44  
45  
46  
47  
48  
49  
50  
51  
52  
53  
54  
55  
56  
57  
58  
59  
60

574 **Table 2 Daily informal care time and personal costs of dementia care sorted by care-needs levels**

|                                             |                                                            |              | Support-<br>required level | Care-need<br>level 1 | Care-need<br>level 2 | Care-need<br>level 3 | Care-need<br>level 4 | Care-need<br>level 5 |
|---------------------------------------------|------------------------------------------------------------|--------------|----------------------------|----------------------|----------------------|----------------------|----------------------|----------------------|
| Informal care<br>time<br>(hours/day)        | ADL                                                        | Mean [SD]    | 2.56 [3.23]                | 2.23 [2.54]          | 2.92 [2.90]          | 3.44 [2.90]          | 3.99 [2.40]          | 4.60 [3.85]          |
|                                             |                                                            | Median [IQR] | 1.67 [2.00]                | 1.50 [2.50]          | 2.00 [3.00]          | 3.00 [3.50]          | 4.00 [3.00]          | 3.33 [4.00]          |
|                                             | IADL                                                       | Mean [SD]    | 2.35 [2.62]                | 2.46 [3.05]          | 2.88 [3.26]          | 2.82 [2.92]          | 3.03 [2.59]          | 3.45 [3.77]          |
|                                             |                                                            | Median [IQR] | 2.00 [2.00]                | 1.50 [2.00]          | 2.00 [2.00]          | 2.00 [2.50]          | 2.00 [3.13]          | 2.00 [4.00]          |
| Personal cost<br>of dementia<br>care (US\$) | Informal<br>care cost                                      | Mean [SD]    | 1518 [2017]                | 1271 [1526]          | 1754 [1982]          | 2181 [2220]          | 2112 [2104]          | 2672 [2314]          |
|                                             |                                                            | Median [IQR] | 747 [1646]                 | 709 [1440]           | 1090 [1697]          | 1366 [2459]          | 1535 [1466]          | 1939 [2240]          |
|                                             | OPP for<br>LTC<br>services<br>covered by<br>insurance      | Mean [SD]    | 148 [190]                  | 158 [174]            | 244 [209]            | 313 [217]            | 301 [202]            | 318 [218]            |
|                                             |                                                            | Median [IQR] | 49 [172]                   | 49 [123]             | 172 [319]            | 368 [441]            | 368 [196]            | 368 [441]            |
|                                             | OPP for<br>care<br>services not<br>covered by<br>insurance | Mean [SD]    | 158 [336]                  | 95 [156]             | 278 [695]            | 303 [543]            | 241 [579]            | 352 [998]            |
|                                             |                                                            | Median [IQR] | 49 [172]                   | 49 [172]             | 49 [368]             | 172 [319]            | 49 [368]             | 49 [368]             |

575 ADL: Activities of Daily Living, IADL: Instrumental Activities of Daily Living, SD: Standard deviation, IQR: Interquartile range

576 OPP: Out-of-pocket payments LTC: Long-term care

577



Figure 1



Figure 1: Selection process for the analysis  
This diagram shows the flow of participants who we focused on.

338x190mm (300 x 300 DPI)

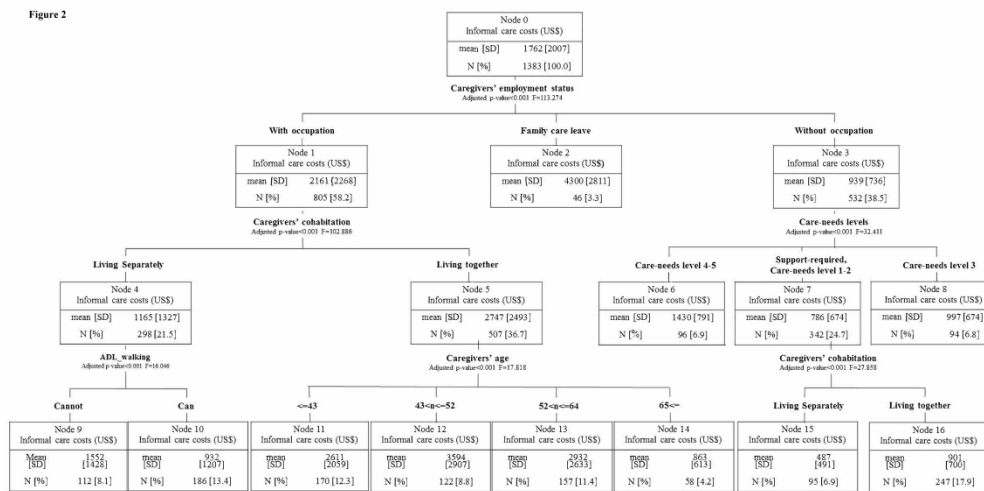

Figure 2: Classification tree of chi-square automatic interaction detection for informal care costs  
 The dendrogram illustrates the combinations of independent variables to clarify who need or provide more informal care.

Abbreviations: ADL, Activities of Daily Living; IADL, Instrumental Activities of Daily Living; SD, Standard deviation; LTC, Long-term care

600x300mm (300 x 300 DPI)

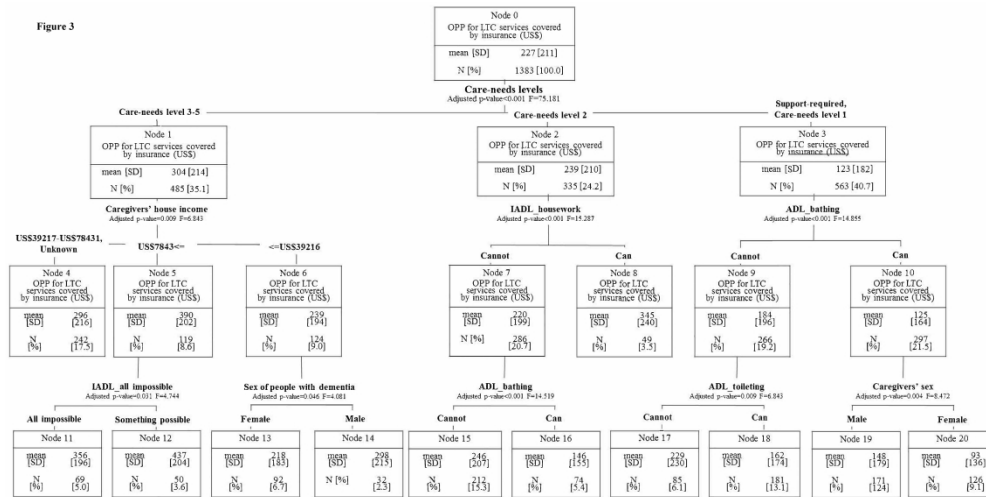

Figure 3: Classification tree of chi-square automatic interaction detection for out-of-pocket payments for LTC services covered by insurance  
 The dendrogram illustrates the combinations of independent variables to clarify who need more LTC insurance services.  
 Abbreviations: ADL, Activities of Daily Living; IADL, Instrumental Activities of Daily Living; SD, Standard deviation; LTC, Long-term care

600x300mm (300 x 300 DPI)



Figure 4: Classification tree of chi-square automatic interaction detection for out-of-pocket payments for LTC services not covered by insurance  
The dendrogram illustrates the combinations of independent variables to clarify who need more LTC services without insurance.  
Abbreviations: ADL, Activities of Daily Living; IADL, Instrumental Activities of Daily Living; SD, Standard deviation; LTC, Long-term care

600x300mm (300 x 300 DPI)

STROBE Statement—Checklist of items that should be included in reports of *cross-sectional studies*

|                              | Item No | Recommendation                                                                                                                                                                                                                                                                                                                                                                                        |
|------------------------------|---------|-------------------------------------------------------------------------------------------------------------------------------------------------------------------------------------------------------------------------------------------------------------------------------------------------------------------------------------------------------------------------------------------------------|
| <b>Title and abstract</b>    | 1       | (a) Indicate the study's design with a commonly used term in the title or the abstract - p.1-2<br>(b) Provide in the abstract an informative and balanced summary of what was done and what was found – p.2-3                                                                                                                                                                                         |
| <b>Introduction</b>          |         |                                                                                                                                                                                                                                                                                                                                                                                                       |
| Background/rationale         | 2       | Explain the scientific background and rationale for the investigation being reported – p.4-5                                                                                                                                                                                                                                                                                                          |
| Objectives                   | 3       | State specific objectives, including any prespecified hypotheses – p.5                                                                                                                                                                                                                                                                                                                                |
| <b>Methods</b>               |         |                                                                                                                                                                                                                                                                                                                                                                                                       |
| Study design                 | 4       | Present key elements of study design early in the paper – p.5                                                                                                                                                                                                                                                                                                                                         |
| Setting                      | 5       | Describe the setting, locations, and relevant dates, including periods of recruitment, exposure, follow-up, and data collection – p.6                                                                                                                                                                                                                                                                 |
| Participants                 | 6       | (a) Give the eligibility criteria, and the sources and methods of selection of participants – p.6 and p.10                                                                                                                                                                                                                                                                                            |
| Variables                    | 7       | Clearly define all outcomes, exposures, predictors, potential confounders, and effect modifiers. Give diagnostic criteria, if applicable – p.6-10                                                                                                                                                                                                                                                     |
| Data sources/<br>measurement | 8*      | For each variable of interest, give sources of data and details of methods of assessment (measurement). Describe comparability of assessment methods if there is more than one group – p.6, 9                                                                                                                                                                                                         |
| Bias                         | 9       | Describe any efforts to address potential sources of bias – p.18-19                                                                                                                                                                                                                                                                                                                                   |
| Study size                   | 10      | Explain how the study size was arrived at – p.6                                                                                                                                                                                                                                                                                                                                                       |
| Quantitative variables       | 11      | Explain how quantitative variables were handled in the analyses. If applicable, describe which groupings were chosen and why – p.11-12                                                                                                                                                                                                                                                                |
| Statistical methods          | 12      | (a) Describe all statistical methods, including those used to control for confounding – p.11-12<br>(b) Describe any methods used to examine subgroups and interactions – p.11-12<br>(c) Explain how missing data were addressed-p.10<br>(d) If applicable, describe analytical methods taking account of sampling strategy – Non applicable<br>(e) Describe any sensitivity analyses – Non applicable |
| <b>Results</b>               |         |                                                                                                                                                                                                                                                                                                                                                                                                       |
| Participants                 | 13*     | (a) Report numbers of individuals at each stage of study—eg numbers potentially eligible, examined for eligibility, confirmed eligible, included in the study, completing follow-up, and analysed – p.12-13<br>(b) Give reasons for non-participation at each stage – Non applicable<br>(c) Consider use of a flow diagram - Figure 1                                                                 |
| Descriptive data             | 14*     | (a) Give characteristics of study participants (eg demographic, clinical, social) and information on exposures and potential confounders – p.13 and Table 1<br>(b) Indicate number of participants with missing data for each variable of interest – Non applicable                                                                                                                                   |
| Outcome data                 | 15*     | Report numbers of outcome events or summary measures – Table 2                                                                                                                                                                                                                                                                                                                                        |
| Main results                 | 16      | (a) Give unadjusted estimates and, if applicable, confounder-adjusted estimates and their precision (eg, 95% confidence interval). Make clear which confounders were adjusted for and why they were included –p.12-13                                                                                                                                                                                 |

|                          |    |                                                                                                                                                                                      |
|--------------------------|----|--------------------------------------------------------------------------------------------------------------------------------------------------------------------------------------|
|                          |    | (b) Report category boundaries when continuous variables were categorized – Non applicable                                                                                           |
|                          |    | (c) If relevant, consider translating estimates of relative risk into absolute risk for a meaningful time period – Non applicable                                                    |
| Other analyses           | 17 | Report other analyses done—eg analyses of subgroups and interactions, and sensitivity analyses – p.13, Figure2-4                                                                     |
| <b>Discussion</b>        |    |                                                                                                                                                                                      |
| Key results              | 18 | Summarise key results with reference to study objectives - p,14-15                                                                                                                   |
| Limitations              | 19 | Discuss limitations of the study, taking into account sources of potential bias or imprecision. Discuss both direction and magnitude of any potential bias – p.18-19                 |
| Interpretation           | 20 | Give a cautious overall interpretation of results considering objectives, limitations, multiplicity of analyses, results from similar studies, and other relevant evidence – p.15-18 |
| Generalisability         | 21 | Discuss the generalisability (external validity) of the study results –p.18-19                                                                                                       |
| <b>Other information</b> |    |                                                                                                                                                                                      |
| Funding                  | 22 | Give the source of funding and the role of the funders for the present study and, if applicable, for the original study on which the present article is based - p.21                 |

\*Give information separately for exposed and unexposed groups.

**Note:** An Explanation and Elaboration article discusses each checklist item and gives methodological background and published examples of transparent reporting. The STROBE checklist is best used in conjunction with this article (freely available on the Web sites of PLoS Medicine at <http://www.plosmedicine.org/>, Annals of Internal Medicine at <http://www.annals.org/>, and Epidemiology at <http://www.epidem.com/>). Information on the STROBE Initiative is available at [www.strobe-statement.org](http://www.strobe-statement.org).

# BMJ Open

## Classification tree model of the personal economic burden of dementia care by related factors of both people with dementia and caregivers in Japan: A cross-sectional online survey

|                                 |                                                                                                                                                                                                                                                                                                                                                                                                                                                                                                                                                                                                                                                                                                                                |
|---------------------------------|--------------------------------------------------------------------------------------------------------------------------------------------------------------------------------------------------------------------------------------------------------------------------------------------------------------------------------------------------------------------------------------------------------------------------------------------------------------------------------------------------------------------------------------------------------------------------------------------------------------------------------------------------------------------------------------------------------------------------------|
| Journal:                        | <i>BMJ Open</i>                                                                                                                                                                                                                                                                                                                                                                                                                                                                                                                                                                                                                                                                                                                |
| Manuscript ID                   | bmjopen-2018-026733.R3                                                                                                                                                                                                                                                                                                                                                                                                                                                                                                                                                                                                                                                                                                         |
| Article Type:                   | Research                                                                                                                                                                                                                                                                                                                                                                                                                                                                                                                                                                                                                                                                                                                       |
| Date Submitted by the Author:   | 12-Jun-2019                                                                                                                                                                                                                                                                                                                                                                                                                                                                                                                                                                                                                                                                                                                    |
| Complete List of Authors:       | Nakabe, Takayo; Kyoto University Graduate School of Medicine, Department of Healthcare Economics and Quality Management<br>Sasaki, Noriko; Kyoto University Graduate School of Medicine, Department of Healthcare Economics and Quality Management<br>Uematsu, Hironori; Kyoto University Graduate School of Medicine, Department of Healthcare Economics and Quality Management<br>Kunisawa, Susumu; Kyoto University Graduate School of Medicine, Department of Healthcare Economics and Quality Management<br>Wimo, Anders; Karolinska Institute, KI Alzheimer's Disease Research Center (ADRC)<br>Imanaka, Yuichi; Kyoto University Graduate School of Medicine, Department of Healthcare Economics and Quality Management |
| <b>Primary Subject Heading</b>: | Public health                                                                                                                                                                                                                                                                                                                                                                                                                                                                                                                                                                                                                                                                                                                  |
| Secondary Subject Heading:      | Health economics                                                                                                                                                                                                                                                                                                                                                                                                                                                                                                                                                                                                                                                                                                               |
| Keywords:                       | Informal care, RUD, Cost, Classification, Japan                                                                                                                                                                                                                                                                                                                                                                                                                                                                                                                                                                                                                                                                                |
|                                 |                                                                                                                                                                                                                                                                                                                                                                                                                                                                                                                                                                                                                                                                                                                                |

SCHOLARONE™  
Manuscripts

1  
2  
3  
4  
5  
6  
7 1 Classification tree model of the personal economic burden of  
8  
9 2 dementia care by related factors of both people with dementia and  
10  
11  
12 3 caregivers in Japan: A cross-sectional online survey  
13  
14  
15  
16 4

17  
18 5 Takayo Nakabe<sup>a</sup>, Noriko Sasaki<sup>a</sup>, Hironori Uematsu<sup>a</sup>, Susumu Kunisawa<sup>a</sup>, Anders Wimo<sup>b</sup>,  
19  
20  
21 6 Yuichi Imanaka<sup>a</sup>

22  
23  
24 7 <sup>a</sup> Department of Healthcare Economics and Quality Management, Graduate School of  
25  
26  
27 8 Medicine, Kyoto University, Yoshida Konoe-cho, Sakyo-ku, Kyoto, Japan.

28  
29  
30 9 <sup>b</sup> Aging Research Centre, Department of Neurobiology, Care Sciences and Society (NVS),  
31  
32  
33 10 Karolinska Institutet and Stockholm University, Stockholm, Sweden

34  
35  
36 11 Corresponding author:

37  
38  
39 12 Yuichi Imanaka, Professor

40  
41  
42 13 Department of Healthcare Economics and Quality Management,

43  
44  
45 14 Graduate School of Medicine, Kyoto University

46  
47  
48 15 Yoshida Konoe-cho, Sakyo-ku, Kyoto 606-8501, Japan

49  
50  
51 16 E-mail: imanaka-y@umin.net

52  
53  
54 17 Tel: +81-75-753-4454 Fax: +81-75-753-4455

55  
56  
57 18 Word counts: 3750 words  
58  
59  
60



1  
2  
3  
4  
5  
6 19 **Abstract**

7  
8 20 **Objective:**

9  
10  
11 21 The purpose of this study was to clarify the micro-level determinants of the economic  
12  
13  
14 22 burden of dementia care at home in Japanese community settings by classifying them into  
15  
16  
17 23 subgroups of factors related to people with dementia and their caregivers.

18  
19  
20 24 **Design:**

21  
22  
23 25 A cross-sectional online survey.

24  
25  
26 26 **Participants:**

27  
28 27 4313 panels of Japanese research company who fulfilled the following criteria: (1) aged  
29  
30  
31  
32 28 30 years or older, (2) non-professional caregiver of someone with dementia, (3) caring  
33  
34  
35 29 for only one person with dementia, and (4) having no conflicts of interest with advertising  
36  
37  
38 30 or marketing research entities.

39  
40  
41 31 **Primary outcome measures:**

42  
43  
44 32 Informal care costs and out-of-pocket payments for long-term care services

45  
46  
47 33 **Results:**

48  
49  
50 34 From 4313 respondents, only 1383 caregivers in community-settings were included in  
51  
52  
53 35 this analysis. We conducted a chi-square automatic interaction detection analysis to  
54  
55  
56 36 identify the factors related to each cost (informal care costs and out-of-pocket payments  
57  
58  
59 37 for long-term care services) divided into sub categories. In the resultant classifications,  
60

1  
2  
3  
4  
5  
6 38 informal care cost was mainly related to caregivers' employment status. When caregivers  
7  
8  
9 39 acquired family care leave, informal care costs were the highest. On the other hand, out-  
10  
11  
12 40 of-pocket payments for long-term care were related to care-need levels and family  
13  
14  
15 41 economic status. ADL and IADL functions such as bathing, toileting, and cleaning were  
16  
17  
18 42 related to all costs.  
19

### 20 21 43 **Conclusion**

22  
23  
24 44 This study clarified the difference in dementia care costs between classified subgroups  
25  
26  
27 45 by considering the combination of the situations of both people with dementia and their  
28  
29  
30 46 caregivers. Informal care costs were related to caregivers' employment and cohabitation  
31  
32  
33 47 status rather to the situations of people with dementia. On the other hand, out-of-pocket  
34  
35  
36 48 payments for long-term care services were related to care-need levels and family  
37  
38  
39 49 economic status. These classifications will be useful in understanding which situation  
40  
41  
42 50 represents a greater economic burden, and helpful in improving the sustainability of the  
43  
44  
45 51 dementia care system in Japan.  
46

47  
48 52  
49  
50  
51  
52  
53  
54  
55  
56  
57  
58  
59  
60

1  
2  
3  
4  
5  
6  
7 **53 Strengths and limitations of this study**  
8

9 ● This study clarified the difference in dementia care costs between classified  
10 subgroups by considering the combination of the situations of both people with  
11 dementia and their caregivers.  
12  
13  
14  
15  
16

17 ● The chi-square automatic interaction detection dendograms provide a visual  
18 depiction of criteria and predictor variable interactions that might not be detected in  
19 traditional analytic procedures.  
20  
21  
22  
23  
24  
25

26 ● The sample may therefore not be representative of all caregivers because the sample  
27 is limited to those who have access to the Internet and are registered with an Internet  
28 research company.  
29  
30  
31  
32  
33  
34

35 ● We only assessed objective burden of dementia care such as informal care time or  
36 costs, then we didn't consider the subjective burden of care and depressive symptoms.  
37  
38  
39  
40  
41

42  
43  
44  
45  
46  
47  
48  
49  
50  
51  
52  
53  
54  
55  
56  
57  
58  
59  
60

## 66 **1. Introduction**

67 In the aging society of Japan, it is estimated that there are approximately 4.7 million  
68 people living with dementia and that there will be approximately 7 million people with  
69 dementia in 2025 [1]. Given that it is also estimated that the total number of people with  
70 dementia throughout the world will double every 20 years [2], we need to reconsider how  
71 to prepare for dementia care in the community.

72 Long-term care (LTC) services in Japan used by people with dementia in home care  
73 can be classified into three main types: (1) LTC insurance services, (3) LTC services not  
74 covered by insurance, and (3) informal care as mutual assistance by family members.

75 When a person with dementia uses the LTC insurance service, the user bears 10% or 20%  
76 of the service expenses as out-of-pocket payments depending on the person's income  
77 (Article 49-2 of the Long-Term Care Insurance Act). Aside from such copayments, when  
78 LTC services not covered by insurance or exceeding the LTC insurance limit amount are  
79 used, people must pay the full amount. Furthermore, it has been pointed out that informal  
80 care is an important component of home care, yet it places a burden on caregivers [3,4].  
81 Nevertheless, given the estimates of the societal costs of dementia care throughout the  
82 world, the impact of informal care is essential [5,6].

83 The Japanese government recommends policies to shift to patient-centered and home-  
84 centered care to reduce the fiscal burden of the insurance system on community-based

1  
2  
3  
4  
5  
6 85 integrated systems. While micro level of impact of dementia care has not been  
7  
8  
9 86 insufficiently understood[7], to construct a sustainable dementia care system, we clarified  
10  
11  
12 87 the personal economic burden of dementia care for different residence types and  
13  
14  
15 88 demonstrated that the cost at home in a community setting was equal to or higher than in  
16  
17  
18 89 various institutions[8]. Sustainable dementia care systems should be provided not only to  
19  
20  
21 90 benefit the government or insurance system but also to benefit people with dementia and  
22  
23  
24 91 their caregivers. Furthermore, although there are increasing dementia care costs related  
25  
26  
27 92 to the severity of dementia [9–12], it can be seen that the cost of dementia care increases  
28  
29  
30 93 through the interaction of characteristics or situations of people with dementia and their  
31  
32  
33 94 caregivers. Given this interaction, it is necessary to understand the actual conditions by  
34  
35  
36 95 classifying cases where the greatest economic burdens in dementia care are felt.

37  
38  
39 96 Therefore, the purpose of this study is to clarify the micro-level determinants of the  
40  
41  
42 97 economic burden of dementia care at home in community settings by classifying them  
43  
44  
45 98 into subgroups of factors related to people with dementia and their caregivers.

46  
47  
48  
49 99

## 100 **2. Methods**

101 This study was a cross-sectional study, based on a self-rated, online questionnaire  
102 survey. The economic burden of dementia care in this study is roughly divided into  
103 informal care costs as opportunity costs and out-of-pocket payments that people actually  
60

1  
2  
3  
4  
5  
6 104 made.

7  
8  
9 105 *2.1. Online survey for data collection on people with dementia and their caregivers*

10 106 In this cross-sectional study, we conducted an online questionnaire survey from March  
11  
12 107 3 to March 14, 2016 in cooperation with a commercial research company (Automatic  
13  
14  
15  
16  
17  
18 108 Internet Research System, Macromill, Inc., Japan). Potential participants fulfilled the  
19  
20  
21 109 following criteria: (1) aged 30 years or older, (2) non-professional caregiver of someone  
22  
23  
24 110 with dementia, (3) caring for only one person with dementia, and (4) having no conflicts  
25  
26  
27 111 of interest with advertising or marketing research entities. A total of 3,600 participants  
28  
29  
30 112 were recruited from the research company's registrants and divided into different age  
31  
32  
33 113 groups (850 participants each in the groups aged in 30's, 40's, 50's, and 60's; 200  
34  
35  
36 114 participants in the group aged  $\geq 70$  years). We excluded caregivers under 29 years of age  
37  
38  
39 115 because, in Japan, they are estimated to represent only 2% of all caregivers [13].

40  
41  
42 116 *2.2. Questionnaire*

43  
44  
45 117 Resource Utilization in Dementia (RUD) [14,15] is a widely used tool to collect data  
46  
47  
48 118 about resource use in persons with dementia and their caregivers [15]. RUD is available  
49  
50  
51 119 in more than 60 languages and it is widely used throughout the world. In this study, we  
52  
53  
54 120 used RUD (Japanese version) items related to the characteristics of people with dementia  
55  
56  
57 121 and their caregivers, informal care time, employed situation of caregivers, residential  
58  
59  
60

1  
2  
3  
4  
5  
6 122 types of people with dementia, and resource use of nursing care services. We added items  
7  
8  
9 123 related to LTC services and residential types. The questionnaire components were divided  
10  
11  
12 124 into four categories: (1) characteristics of people with dementia, (2) caregivers' situations  
13  
14  
15 125 (e.g., employment and cohabitation status), (3) informal care duration and (4) frequency  
16  
17  
18 126 of utilization of LTC services.

19  
20  
21 127 In this project, we could not get information about severity of dementia data because it  
22  
23  
24 128 was regarded as too difficult for caregivers to estimate that. However, we asked for  
25  
26  
27 129 substantial information about care-needs levels. Care needs reflect function, which is a  
28  
29  
30 130 stronger explanatory factor for costs than cognition [16]. Care-needs levels (Support-  
31  
32  
33 131 needs levels 1-2, Care-needs levels 1-5) determine whether a person is qualified to apply  
34  
35  
36 132 for LTC insurance (Article 27 and 32 of the Long-Term Care Insurance Act). Once an  
37  
38  
39 133 insured person applies to use any LTC service, their mental and physical status is first be  
40  
41  
42 134 assessed by certified researchers using a basic checklist. Based on this checklist, care-  
43  
44  
45 135 need times are estimated using an evidence-based computer algorithm. This algorithm  
46  
47  
48 136 was created from the data on how much LTC services were required in 48 hours for more  
49  
50  
51 137 than 3,000 elderly people as a one-minute time study [17]. After estimating the care-needs  
52  
53  
54 138 time, care-needs levels were determined by an expert panel to indicate the amount of care  
55  
56  
57 139 required by each person while taking into consideration their symptoms and functional  
58  
59  
60

1  
2  
3  
4  
5  
6 140 capability. High care-needs levels indicate increasing dependency and requirement for  
7  
8  
9 141 LTC services [18]. Care-need levels also affect the base amount of the maximum payment  
10  
11  
12 142 for LTC services allowance categories covered by insurance.  
13  
14

### 15 143 *2.3. Informal care time*

16  
17  
18 144 In the questionnaire, informal care time was divided in three domains; support for  
19  
20  
21 145 Activities of Daily Living (ADL), Instrumental Activities of Daily Living (IADL) and  
22  
23  
24 146 Supervision [15]. We asked for the mean caregiving time per day and mean caregiving  
25  
26  
27 147 days per week in the past 30 days. We then multiplied the mean daily caregiving time and  
28  
29  
30 148 caregiving days per week to calculate both weekly and monthly informal care time.  
31  
32  
33 149 Supervision time was excluded in calculating informal care time and costs because  
34  
35  
36 150 supervision could be done simultaneously when caregiving for ADL and IADL functions,  
37  
38  
39 151 or in other housekeeping for people without dementia and other family members.  
40  
41

### 42 152 *2.4. Cost estimation*

43  
44  
45 153 In this study, we identified three costs as follows: informal care costs, out-of-pocket  
46  
47  
48 154 payments for LTC services covered by insurance (copayments), and out-of-pocket  
49  
50  
51 155 payments for LTC services not covered by insurance. To calculate the informal care costs,  
52  
53  
54 156 there are two methods that are frequently used: the “opportunity cost” and “replacement  
55  
56  
57 157 cost” approaches [19–21]. With the opportunity cost approach it is assumed that there is  
58  
59  
60



1  
2  
3  
4  
5  
6 158 an alternative use of caregiving time (such as paid work) and thus estimates the costs due  
7  
8  
9 159 to this lost opportunity, whereas the replacement cost approach assumes that informal  
10  
11  
12 160 care services can be valued similarly to home care services provided by professional  
13  
14  
15 161 caregivers. Even though many previous studies on the economic valuation of informal  
16  
17  
18 162 care have used the replacement cost approach [20], the ‘opportunity cost approach’ is  
19  
20  
21 163 recommended by the developers of RUD for estimating informal care costs [2,5,22]. We  
22  
23  
24 164 used the opportunity cost approach to assess informal care time as forgone wages for  
25  
26  
27 165 caregivers [2,5,9]. We used caregivers’ monthly mean wages stratified by sex and age to  
28  
29  
30 166 value informal care. We assessed informal care costs for caregivers who were not working  
31  
32  
33 167 or who were over 65 years of age at 30% of the mean wage of employed caregivers [23–  
34  
35  
36 168 26]. A maximum daily informal care time of 16 hours was assumed, in order to allow for  
37  
38  
39 169 other activities such as cooking for other family members and sleep [12,27,28].  
40  
41  
42 170 Caregivers were asked to state their contribution to the total informal care in 5-point scale  
43  
44  
45 171 of 20%. In order to treat all caregivers as primary caregivers and estimate the costs  
46  
47  
48 172 associated with all informal care provided to a patient, we adjusted the informal care time  
49  
50  
51 173 by dividing its time by the median of these contribution levels, according to RUD  
52  
53  
54 174 instructions. This adjustment of informal care time was done only when calculating the  
55  
56  
57 175 informal care costs.  
58  
59  
60

1  
2  
3  
4  
5  
6 176 Out-of-pocket payments for LTC services both covered and not covered by insurance  
7  
8  
9 177 were included in the questionnaire. We asked for these out-of-pocket payments through  
10  
11  
12 178 categories that were easy to answer (no payments, under JPY9,999, JPY10,000–24,999,  
13  
14  
15 179 JPY25,000–49,999, JPY50,000–74,999, JPY75,000–99,999, JPY100,000–124,999,  
16  
17  
18 180 JPY125,000–149,999, JPY150,000–299,999, JPY300,000–499,999, and over  
19  
20  
21 181 JPY500,000). We adjusted the answers by capping the upper limit of the limit amount  
22  
23  
24 182 (Care-needs level 1; JPY166,920, Care-needs level 5; JPY 360,650) depending on each  
25  
26  
27 183 care-needs level or each ratio of copayment (10% or 20%) if the answers were over it.  
28  
29  
30 184 These costs were substituted by a median of each category, and we calculated the  
31  
32  
33 185 weighted average as the following formula: 
$$\frac{\sum_{i=0}^k (\text{median of category}_i) * n_i}{\sum n}$$
  
34  
35

36 186 All costs were converted from Japanese yen to US dollars using the purchasing power  
37  
38  
39 187 parity rate in 2016 (¥102 = \$1) provided by the Organization for Economic Cooperation  
40  
41  
42 188 and Development.

### 45 189 *2.5. Inclusion and exclusion criteria*

47  
48 190 With respondents, we only focused on community settings for people with dementia  
49  
50  
51 191 who lived in their own home. We excluded respondents based on the following criteria:  
52  
53  
54 192 (1) people with dementia who were hospitalized or lived in nursing home, (2) lack of data  
55  
56  
57 193 about out-of-pocket payments for LTC services or care-needs levels, (3) contradictions  
58  
59  
60

1  
2  
3  
4  
5  
6 194 in relationships between caregivers and people with dementia, and (4) contradictions in  
7  
8  
9 195 care time (over 24 hours). When the age difference was less than 15 years and the person  
10  
11  
12 196 with dementia was a parent or child (not in-law), these cases were identified as  
13  
14  
15 197 contradictions.

## 18 198 *2.6. Statistical analysis*

20  
21 199 We conducted descriptive analysis for characteristics of people with dementia and  
22  
23  
24 200 caregivers. We then stratified the informal care time and dementia care costs by the care-  
25  
26  
27 201 needs level and cohabitation to test our hypothesis that high care-needs level or people  
28  
29  
30 202 who lives with caregivers need more informal care time. In this description, we didn't  
31  
32  
33 203 adjusted informal care time by caregivers' contribution rate.

34  
35  
36 204 Also, we used chi-square automatic interaction detection (CHAID) analysis to identify  
37  
38  
39 205 the characteristics of people with dementia and caregivers who needed more care services.  
40  
41  
42 206 In CHAID analysis, the dependent variable would be divided into sub-groups by the most  
43  
44  
45 207 explanatory independent variables. These groups could be formed by any possible  
46  
47  
48 208 combination with all independent variables. Especially, we conducted an exhaustive  
49  
50  
51 209 CHAID analysis that repeats the trial until it finds the optimal combination of all  
52  
53  
54 210 independent variables. The CHAID dendograms provide a visual depiction of criteria and  
55  
56  
57 211 predictor variable interactions that might not be detected in traditional analytic procedures.  
58  
59  
60

1  
2  
3  
4  
5  
6 212 We set informal care costs, out-of-pocket payments for LTC services covered by  
7  
8  
9 213 insurance and out-of-pocket payments for LTC services not covered by insurance as  
10  
11  
12 214 dependent variables. Then, we used the characteristics of people with dementia (age, sex,  
13  
14  
15 215 care-need level, dementia types, ADL and IADL functions, and primary disease as the  
16  
17  
18 216 reason for care), the characteristics of caregivers (age, sex, marital status, children,  
19  
20  
21 217 cohabitation with people with dementia, visiting time, relationship to people with  
22  
23  
24 218 dementia, and occupation), and economic factors (the ratio of copayments for healthcare  
25  
26  
27 219 services and family income of caregivers). We treated the ratio of copayments for  
28  
29  
30 220 healthcare services as income proxy variable because this ratio was decided by income of  
31  
32  
33 221 people with dementia. We set the following criteria: tree depth was limited to three levels,  
34  
35  
36 222 no group smaller than 100 was split, no group smaller than 30 was formed, and the p-  
37  
38  
39 223 value for all statistical tests was under 0.05.

40  
41  
42 224 All data were analyzed using IBM SPSS Statistics 23.0 for Windows (SPSS Japan Inc.,  
43  
44  
45 225 Tokyo, Japan).

## 46 47 48 226 *2.6. Ethical considerations and consents*

49  
50  
51 227 This study was approved by the Ethics committee of Kyoto University Graduate School  
52  
53  
54 228 of Medicine (R0487). All participants were volunteers and they were informed that there  
55  
56  
57 229 was no obligation to participate in the study, and only people who consented to this study  
58  
59  
60

1  
2  
3  
4  
5  
6 230 completed the questionnaire.  
7  
8

9 231 *2.7. Patient and public involvement*  
10  
11

12 232 Patients were not formally involved in this study; however, their caregivers participated  
13  
14  
15 233 in our online-based questionnaire survey. Caregivers, who constituted the online panel,  
16  
17  
18 234 were sent the invitation by the Internet research company. Patients and their caregivers  
19  
20  
21 235 can view the results of this study when it is published in a peer-reviewed journal.  
22  
23

24 236 **3. Results**  
25  
26

27 237 *3.1. Characteristics of people with dementia and their caregivers*  
28  
29

30 238 A total of 3,916 caregivers answered the questionnaire. We focused only on people  
31  
32  
33 239 with dementia who lived in their own home (n=2277). However, we excluded the data  
34  
35  
36 240 according to the criteria and the final sample comprised 1,383 respondents (Figure 1).  
37  
38

39 241 Table 1 shows the characteristics of people with dementia and their caregivers. More  
40  
41  
42 242 than half of the people with dementia were female (66.7%), and the mean age was 81.8  
43  
44  
45 243 years. In contrast, more than half of the caregivers were male (61.7%), and the mean age  
46  
47  
48 244 was 52.2 years. 1,233 people (89.2%) responded that ADL functions such as meals and  
49  
50  
51 245 toilet use could be managed by themselves, while IADL functions such as cleaning and  
52  
53  
54 246 shopping could be done by one person in the same way. There were only 788 people  
55  
56  
57 247 (57.0%) who did the latter by themselves.  
58  
59  
60

1  
2  
3  
4  
5  
6 248 *3.2. Informal care time and costs of dementia care*

7  
8  
9 249 The mean daily informal care time was 9.36 hours in total. The time for only ADL was  
10  
11  
12 250 4.97 hours and for only IADL was 4.39 hours. On the other hand, monthly informal care  
13  
14  
15 251 time (ADL+IADL) was 166.32 hours. Table 2 shows the differences in daily informal  
16  
17  
18 252 care time and personal cost of dementia care among the care-need levels. In this table, we  
19  
20  
21 253 didn't adjust by contribution rate. Informal care times increased with care-needs levels,  
22  
23  
24 254 especially in ADL. Out-of-pocket payments for LTC services were less than informal  
25  
26  
27 255 care costs in all of the care-needs levels.

28  
29  
30 256

31  
32 257 *3.3. Classification with classification trees*

33  
34  
35 258 Figure 2 shows the results of CHAID analysis for informal care costs. Informal care  
36  
37  
38 259 costs were related to caregivers' employment status, cohabitation, age, and care-needs  
39  
40  
41 260 levels or ADL function of people with dementia. When the caregiver acquired family care  
42  
43  
44 261 leave, informal care cost was the highest (node 2). For the caregivers who were between  
45  
46  
47 262 43-52 years old (node 12) and worked outside the home as well as cohabited with people  
48  
49  
50 263 with dementia, informal care costs were high, similar to caregivers who acquired family  
51  
52  
53 264 care leave (node 2). Even if the caregiver did not work, informal care costs were higher  
54  
55  
56 265 with high care-needs levels (node 6-8). The costs for cohabiting caregivers (node 5) were  
57  
58  
59 266 higher than for those not cohabiting (node 4). For those not cohabiting and the person  
60

1  
2  
3  
4  
5  
6 267 with dementia could not walk without assistance (node 9), informal care costs were higher  
7  
8  
9 268 than for those that could walk (node 10) .  
10  
11

12 269 Out-of-pocket payments for LTC services covered by insurance were related to care-  
13  
14  
15 270 need levels, ADL or IADL functions, sex (both the people with dementia and caregivers)  
16  
17  
18 271 and caregivers' household incomes (Figure 3). Especially, if the people with dementia  
19  
20  
21 272 could bathe or use the toilet by themselves, out-of-pocket payments would be about 65%  
22  
23  
24 273 lower (nodes 9-10, 15-18). On the other hand, if out-of-pocket payments were not covered  
25  
26  
27 274 by insurance, they were related to caregivers' household incomes, income proxy variable,  
28  
29  
30 275 ADL or IADL functions of people with dementia, and age of people with dementia  
31  
32  
33 276 (Figure 4). Both the out-of-pocket payments that were covered by insurance and those  
34  
35  
36 277 that were not were related to caregivers' house hold income or ADL functions which  
37  
38  
39 278 affected the ability to pay and service use volume.  
40

41  
42 279

#### 44 280 **4. Discussion**

45  
46  
47 281 In this study, we first demonstrated that informal care time for ADL or IADL functions  
48  
49  
50 282 increased with high care-needs levels as our hypothesis stipulated (Care-need level 1:  
51  
52  
53 283 2.2hours, level 3: 3.4 hours. level 5: 4.6 hours). Second, we established that the  
54  
55  
56 284 combination of characteristics of both people with dementia and their caregivers were  
57  
58  
59 285 related to dementia care costs through the classification tree analysis. Caregivers'  
60

1  
2  
3  
4  
5  
6 286 employment and cohabitation status were mainly related to informal care costs, and the  
7  
8  
9 287 costs were the highest when caregivers took nursing care leave, which caregivers leave  
10  
11  
12 288 work due to caregiving. Furthermore, when caregivers worked at an occupation and lived  
13  
14  
15 289 separately, or the people with dementia could not walk, the costs doubled. Out-of-pocket  
16  
17  
18 290 payments for LTC services covered by insurance were mainly related to care-need levels  
19  
20  
21 291 and ADL and IADL functions. In the case of low care-needs levels, where care was  
22  
23  
24 292 needed for toileting or bathing, high out-of-pocket payments were required for LTC  
25  
26  
27 293 insurance services. On the other hand, out-of-pocket payments were related to caregivers'  
28  
29  
30 294 household income levels or income proxy variable. Caregivers with high annual incomes  
31  
32  
33 295 (more than \$117,648 US) made out-of-pocket payments for dementia care of full amounts  
34  
35  
36 296 that were two to five times more than others.

37  
38  
39 297 Informal care costs were mainly related to caregivers' characteristics such as  
40  
41  
42 298 employment or cohabitation status in the classification tree, which illustrated related  
43  
44  
45 299 factors by order of precedence. In many previous studies, ADL functions or dementia  
46  
47  
48 300 severity were explained as related factors in regression models [9–12]. Some studies  
49  
50  
51 301 showed caregivers' characteristics such as employment status were related to informal  
52  
53  
54 302 care costs [9,29,30], but few studies considered all of the caregivers' characteristics. Thus,  
55  
56  
57 303 caregiver factors may be as important as factors related to people with dementia are.  
58  
59  
60



1  
2  
3  
4  
5  
6 304 Furthermore, we considered the combination of characteristics of both people with  
7  
8  
9 305 dementia and their caregivers. For example, informal care costs doubled when caregivers  
10  
11  
12 306 lived separately and people with dementia could not walk. Many previous studies  
13  
14  
15 307 established the determinants by regression analysis[9,12,31–34]. Although it is possible  
16  
17  
18 308 to understand the influence on the objective variable adjusted in the multivariate by  
19  
20  
21 309 regression analysis, the combinations between explanatory variables have not been  
22  
23  
24 310 clarified. CHAID analysis provided the classification only for related characteristics in  
25  
26  
27 311 the outcome. Such combinations suggest that support should be provided to caregivers  
28  
29  
30 312 who cannot live with people with dementia or caregivers who are not employed (Figure  
31  
32  
33 313 2, Node 3-4).

34  
35  
36 314 The association between out-of-pocket payments for LTC services covered by  
37  
38  
39 315 insurance and care-need levels is reasonable because the benefit limit standard amounts  
40  
41  
42 316 for formal care services at home are decided in relation to care-need levels[35]. In  
43  
44  
45 317 addition, when people with dementia had a high care-needs level and their caregiver's  
46  
47  
48 318 household income was high, out-of-pocket payments were high. Because the  
49  
50  
51 319 determination of service usage within the limit amount is a free contract, people with  
52  
53  
54 320 dementia and their caregivers may decide how they use formal care services depending  
55  
56  
57 321 on how much they can pay for services. High care-needs levels [36], age[10,34,36,37]  
58  
59  
60

1  
2  
3  
4  
5  
6 322 and sex[10,36] were related to the high costs of LTC services. Even for low care-needs  
7  
8  
9 323 levels, the cost may be high when people with dementia need assistance with bathing or  
10  
11  
12 324 toileting. This was affected by LTC insurance services providing specific substitutions,  
13  
14  
15 325 such as bath assistance, and also Ku et al.'s or Dodel et al.'s ADL functions were related  
16  
17  
18 326 to the social care costs[9,30].  
19

20  
21 327 Similarly, economic variables such as household income and income proxy variable  
22  
23  
24 328 were mainly related to out-of-pocket payments for LTC services not covered by insurance  
25  
26  
27 329 (Figure 4). This is because people must pay the full amount if they use LTC services  
28  
29  
30 330 without insurance. In the United States, high copayments are required for the use of LTC  
31  
32  
33 331 services; however, these copayments were related to age, sex, and comorbidities in the  
34  
35  
36 332 cohort study [37]. A part of the result of Hurd et al. was similar to our results in the case  
37  
38  
39 333 of the payments that were covered by insurance for the use of LTC services. Out-of-  
40  
41  
42 334 pocket payments not covered by insurance might occur over the limit standard  
43  
44  
45 335 amounts or the use of LTC services not covered by insurance (e.g. feeding service[38]).  
46  
47  
48 336 According to the questionnaire responses, people tended to pay for expendables such as  
49  
50  
51 337 diapers, employment of housekeepers, and home repair such as handrail installation as  
52  
53  
54 338 out-of-pocket payments not covered by LTC insurance. Furthermore, except when  
55  
56  
57 339 caregivers' income was high, the cost did not change significantly due to differences in  
58  
59  
60

1  
2  
3  
4  
5  
6 340 ADL and IADL functions as it did for the payments that were covered by insurance.  
7  
8

9 341 These application examples were not really affected by ADL or IADL functions.  
10  
11

12 342 From the viewpoint of independent variables, if people with dementia lacked some  
13  
14

15 343 ADL function, then costs might be higher but in the case of IADL functions this was  
16  
17

18 344 reversed. There is a possibility that some services are used to support the independent  
19  
20

21 345 lives of people with dementia. Some people with dementia who can do housework by  
22  
23

24 346 themselves might move or walk around more, and therefore use more LTC services like  
25  
26

27 347 commuting for care (day service) or commuting for rehabilitation. Also, care-need levels  
28  
29

30 348 were not related to out-of-pocket payments not covered by insurance. The above  
31  
32

33 349 application examples were also not related to care-needs levels. The relationship of  
34  
35

36 350 cohabitation or employment status was the same as in previous studies [9,29,32]. While  
37  
38

39 351 differences of burden of dementia care depended on the dementia types that existed and  
40  
41

42 352 were pointed out [24], dementia types were not related to any other factors in this study.  
43  
44

45 353 In our CHAID analysis, family caregivers' economic status or severity (care-needs levels)  
46  
47

48 354 might have been more important than dementia types to dementia care costs. In creating  
49  
50

51 355 policy for LTC services in an aging society, we must understand the actual conditions  
52  
53

54 356 from not only a societal but also a personal perspective. This is true even if from a societal  
55  
56

57 357 viewpoint, the societal cost of dementia care in the community has been established by  
58  
59  
60

1  
2  
3  
4  
5  
6 358 other countries to be greater than that in institutional care [39]. Furthermore, we need a  
7  
8  
9 359 wide range of perspectives of stakeholders to discuss the dementia care system, while  
10  
11  
12 360 almost all studies of economic burden of dementia stood on societal or payers'  
13  
14  
15 361 viewpoint[7,19–21]. Then, as a first step, we need to understand what people with  
16  
17  
18 362 dementia and their family caregivers are already spending too much money on. We need  
19  
20  
21 363 to recognize the complicated combination of characteristics associated with people with  
22  
23  
24 364 dementia and their caregivers. To this point, the results of this classification could be  
25  
26  
27 365 useful to understanding which situation requires more resources depending on cost types.  
28  
29  
30 366 Our results may suggest that a sustainable dementia care system in Japan should be  
31  
32  
33 367 reconstructed from a personal viewpoint.

36 368 There are some limitations to this study. First, we conducted an online questionnaire  
37  
38  
39 369 survey with caregivers of people with dementia. Traditionally, respondents who use the  
40  
41  
42 370 Internet tend to be male and relatively young, reflecting the general characteristics of  
43  
44  
45 371 online research [40–42]. The sample may therefore not be representative of all caregivers  
46  
47  
48 372 because the sample is limited to those who have access to the Internet and are registered  
49  
50  
51 373 with an Internet research company [43]. Certainly, we cannot extrapolate the  
52  
53  
54 374 representative value in each node of the CHAID tree to the population as a whole.  
55  
56  
57 375 However, this study focused on finding a combination of independent variables related to  
58  
59  
60

1  
2  
3  
4  
5  
6 376 the dependent variables (informal care cost and financial burden), taking into account the  
7  
8  
9 377 interaction between multiple independent variables. The significance of subgroups made  
10  
11  
12 378 by combinations of variables may not change significantly even if the population changes.  
13  
14  
15 379 Therefore, in this study, influence due to the difference between this sample and general  
16  
17  
18 380 public is not considered to be a practical problem. However, further research (e.g. a  
19  
20  
21 381 paper-based questionnaire survey mailed to the family caregivers association) to collect  
22  
23  
24 382 representative samples might be needed in the future. Second, it was impossible to  
25  
26  
27 383 measure the response rate in this study. Samples were collected from an online panel  
28  
29  
30 384 until the target number set in each age category was achieved. Third, we didn't consider  
31  
32  
33 385 the subjective burden of care and depressive symptoms. These mental burdens are  
34  
35  
36 386 considered to be important factors in explaining the actual state of care costs, and many  
37  
38  
39 387 previous studies in Japan have covered subjective costs [44–46]. In the future, in addition  
40  
41  
42 388 to the burden of time and money, it would be preferable to measure subjective burdens.  
43  
44  
45 389 Fourth, we couldn't measure the clinical dementia severity data measured by such as Mini  
46  
47  
48 390 Mental State Examination or Nueropsychiatric Inventory questionnaire. However, we  
49  
50  
51 391 used care-needs levels as substantial measurements of the severity data, which indicates  
52  
53  
54 392 individual requirements for amount of care determined by an evidence-based computer  
55  
56  
57 393 algorithm and expert panel. Fifth, we estimated informal care costs only by the  
58  
59  
60

1  
2  
3  
4  
5  
6 394 opportunity cost approach. Some studies indicated results estimated by both opportunity  
7  
8  
9 395 cost approach and replacement cost approach. The opportunity cost approach might be  
10  
11  
12 396 underestimated in comparison to the replacement approach[9,37]  
13  
14

15 397

## 18 398 **Conclusions**

21 399 This study clarified the difference in dementia care costs between classified subgroups  
22  
23  
24 400 by considering the combination of the situations of both people with dementia and their  
25  
26  
27 401 caregivers. Informal care costs were related to caregivers' employment and cohabitation  
28  
29  
30 402 status rather to the situation of people with dementia. On the other hand, out-of-pocket  
31  
32  
33 403 payments for long-term care services were related to care-needs levels and family  
34  
35  
36 404 economic status. These classifications will be useful in understanding which situation  
37  
38  
39 405 represents a greater economic burden, and helpful in improving the sustainability of the  
40  
41  
42 406 dementia care system in Japan.  
43  
44

45 407

## 48 408 **Footnotes**

### 51 409 *Abbreviations*

54 410 LTC: Long-Term Care

57 411 RUD: Resource Utilization in Dementia

1  
2  
3  
4  
5  
6 412 ADL: Activities of Daily Life  
7

8  
9 413 IADL: Instrumental Activities of Daily Life  
10

11  
12 414 CHAID analysis: chi-square automatic interaction detection analysis  
13

14  
15 415 *Authors' contribution*  
16

17  
18 416 TN, SN and YI designed the study. All authors discussed for preparing the questionnaire.  
19

20  
21 417 TN mainly analyzed all data, and HU, SK, AW and YI advised for analysis. TN prepared  
22

23  
24 418 the draft of the manuscript, then all authors contributed to rewrite it. All authors read and  
25

26  
27 419 approved the final manuscript.  
28

29  
30 420 *Funding sources*  
31

32  
33 421 This study was financially supported by a Health Sciences Research Grant from the  
34

35  
36 422 Ministry of Health, Labour and Welfare of Japan (H27-ninntishou-ippan-001), the Japan  
37

38  
39 423 Foundation for Aging and Health (H27), and a Grant-in-Aid for Scientific Research from  
40

41  
42 424 the Japan Society for the Promotion of Science ([A]16H02634). The funders had no role  
43

44  
45 425 in the study design, data collection and analysis, decision to publish, or preparation of the  
46

47  
48 426 manuscript.  
49

50  
51 427 *Competing interest*  
52

53  
54 428 None declared.  
55  
56  
57  
58  
59  
60

1  
2  
3  
4  
5  
6 429 *Acknowledgements*  
7

8  
9 430 None.  
10

11  
12 431 *Conflicts of interest*  
13

14  
15 432 None.  
16

17  
18 433 *Data sharing statement*  
19

20  
21 434 No additional data are available. When this study was approved by the ethics committee of  
22

23  
24 435 Kyoto University Graduate School of Medicine (R0487), due to the sensitive issues, the  
25

26  
27 436 raw data which we collected should not be treated outside of our laboratory.  
28

29  
30 437  
31  
32  
33  
34  
35  
36  
37  
38  
39  
40  
41  
42  
43  
44  
45  
46  
47  
48  
49  
50  
51  
52  
53  
54  
55  
56  
57  
58  
59  
60



438 **References**

- 439 1 Ninomiya T, Kiyohara Y, Obara T, *et al.* A study on future estimation of the  
440 elderly population of dementia in Japan Grant-in-Aid for Scientific Research for  
441 Ministru of Health, Labor and Welfare in 2014( H26-Tokubetsu-Shitei-036).  
442 2014. [https://mhlw-](https://mhlw-grants.niph.go.jp/niph/search/NIDD00.do?resrchNum=201405037A)  
443 [grants.niph.go.jp/niph/search/NIDD00.do?resrchNum=201405037A](https://mhlw-grants.niph.go.jp/niph/search/NIDD00.do?resrchNum=201405037A)
- 444 2 Prince M, Wimo A, Guerchet M, *et al.* World Alzheimer Report 2015: the global  
445 impact of dementia. 2015. <https://www.alz.co.uk/research/world-report-2015>  
446 (accessed 3 Apr 2016).
- 447 3 Wimo A, Jönsson L, Fratiglioni L, *et al.* The societal costs of dementia in  
448 Sweden 2012 - relevance and methodological challenges in valuing informal  
449 care. *Alzheimers Res Ther* 2016;**8**:59. doi:10.1186/s13195-016-0215-9
- 450 4 Wimo A, Strauss E Von, Nordberg G. Time spent on informal and formal care  
451 giving for persons with dementia in Sweden. *Heal Po* 2002;**61**:255–68.
- 452 5 Wimo A, Prince M. World Alzheimer Report 2010 THE GLOBAL ECONOMIC  
453 IMPACT OF DEMENTIA.  
454 2010. [https://www.alz.co.uk/research/files/WorldAlzheimerReport2010Executive](https://www.alz.co.uk/research/files/WorldAlzheimerReport2010ExecutiveSummary.pdf)  
455 [Summary.pdf](https://www.alz.co.uk/research/files/WorldAlzheimerReport2010ExecutiveSummary.pdf) (accessed 3 Apr 2016).
- 456 6 Wimo A, Ali G, Wu Y, *et al.* The worldwide costs of dementia 2015 and

- 1  
2  
3  
4  
5  
6 457 comparisons with 2010. *Alzheimer's Dement* 2016;:1–7.  
7  
8  
9 458 doi:10.1016/j.jalz.2016.07.150  
10  
11  
12 459 7 Jönsson L, Lin P-J, Khachaturian AS. Special topic section on health economics  
13  
14  
15 460 and public policy of Alzheimer's disease. *Alzheimer's Dement* 2017;**13**:201–4.  
16  
17  
18 461 doi:10.1016/j.jalz.2017.02.004  
19  
20  
21 462 8 Nakabe T, Sasaki N, Uematsu H, *et al*. The personal cost of dementia care in  
22  
23  
24 463 Japan: A comparative analysis of residence types. *Int J Geriatr Psychiatry*  
25  
26  
27 464 2018;**33**:1243–52. doi:10.1002/gps.4916  
28  
29  
30 465 9 Ku L-JE, Pai M-C, Shih P-Y. Economic Impact of Dementia by Disease  
31  
32  
33 466 Severity: Exploring the Relationship between Stage of Dementia and Cost of  
34  
35  
36 467 Care in Taiwan. *PLoS One* 2016;**11**:e0148779.  
37  
38  
39 468 doi:10.1371/journal.pone.0148779  
40  
41  
42 469 10 Leicht H, Heinrich S, Heider D, *et al*. Net costs of dementia by disease stage.  
43  
44  
45 470 *Acta Psychiatr Scand* 2011;**124**:384–95. doi:10.1111/j.1600-0447.2011.01741.x  
46  
47  
48 471 11 Leicht H, König H-H, Stuhldreher N, *et al*. Predictors of Costs in Dementia in a  
49  
50  
51 472 Longitudinal Perspective. *PLoS One* 2013;**8**:e70018.  
52  
53  
54 473 doi:10.1371/journal.pone.0070018  
55  
56  
57 474 12 Farré M, Haro JM, Kostov B, *et al*. Direct and indirect costs and resource use in  
58  
59  
60

- 1  
2  
3  
4  
5  
6 475 dementia care: A cross-sectional study in patients living at home. *Int J Nurs Stud*  
7  
8  
9 476 2016;**55**:39–49.  
10  
11  
12 477 13 Ministry of Internal Affairs and Communications. Survey on Time Use and  
13  
14  
15 478 Leisure Activities in 2016. 2017.  
16  
17  
18 479 <http://www.stat.go.jp/data/shakai/2016/pdf/gaiyou2.pdf> (accessed 6 Mar 2018).  
19  
20  
21 480 14 Wimo A, Jonsson L, Zbrozek A. The Resource Utilization in Dementia (RUD)  
22  
23  
24 481 instrument is valid for assessing informal care time in community-living patients  
25  
26  
27 482 with dementia. *J Nutr Health Aging* 2010;**14**:685–  
28  
29  
30 483 90.<http://www.ncbi.nlm.nih.gov/pubmed/20922346> (accessed 3 Feb 2016).  
31  
32  
33 484 15 Wimo A, Gustavsson A, Jonsson L, *et al.* Application of resource utilization in  
34  
35  
36 485 dementia (RUD) instrument in a global setting. *Alzheimer's Dement* 2013;**9**:429–  
37  
38  
39 486 35. doi:10.1016/j.jalz.2012.06.008  
40  
41  
42 487 16 Mesterton J, Wimo A, By A, *et al.* Cross sectional observational study on the  
43  
44  
45 488 societal costs of Alzheimer's disease. *Curr Alzheimer Res* 2010;**7**:358–  
46  
47  
48 489 67.<http://www.ncbi.nlm.nih.gov/pubmed/19939223> (accessed 11 Jun 2018).  
49  
50  
51 490 17 Ministry of Health Labour and Welfare. Mechanism and procedures for  
52  
53  
54 491 cartification of care-needs levels. <https://www.mhlw.go.jp/file/05-Shingikai->  
55  
56  
57 492 11901000-Koyoukintoujidoukateikyoku-Soumuka/0000126240.pdf (accessed 12  
58  
59  
60

- 1  
2  
3  
4  
5  
6 493 Feb 2019).
- 7  
8  
9 494 18 Lin H-R, Otsubo T, Imanaka Y. Survival analysis of increases in care needs  
10  
11  
12 495 associated with dementia and living alone among older long-term care service  
13  
14  
15 496 users in Japan. *BMC Geriatr* 2017;**17**:182. doi:10.1186/s12877-017-0555-8  
16  
17
- 18 497 19 Mauskopf J, Mucha L. A Review of the Methods Used to Estimate the Cost of  
19  
20  
21 498 Alzheimer ' s Disease in the United States. *Am J Alzheimer ' s Dis Other*  
22  
23  
24 499 *Dementias* 2011;**26**:298–309. doi:10.1177/1533317511407481  
25  
26
- 27 500 20 Quentin W, Sg R, Lupp M, *et al*. Cost-of-illness studies of dementia : a  
28  
29  
30 501 systematic review focusing on stage dependency of costs. *Acta Psychiatr Scand*  
31  
32  
33 502 2010;**121**:243–59. doi:10.1111/j.1600-0447.2009.01461.x  
34  
35
- 36 503 21 Schaller S, Mauskopf J, Kriza C, *et al*. The main cost drivers in dementia : a  
37  
38  
39 504 systematic review. *Int J Geriatr Psychiatry* 2015;**30**:111–29.  
40  
41  
42 505 doi:10.1002/gps.4198  
43  
44
- 45 506 22 Wimo A, Winblad B, Jönsson L. An estimate of the total worldwide societal  
46  
47  
48 507 costs of dementia in 2005. *Alzheimer ' s Dement* 2007;**3**:81–91.  
49  
50  
51 508 doi:10.1016/j.jalz.2007.02.001  
52  
53
- 54 509 23 Johannesson M, Borgquis L, Jönsson B, *et al*. The costs of treating hypertension -  
55  
56  
57 510 an analysis of different cut-off points. *Health Policy (New York)* 1991;**18**:141–  
58  
59  
60

- 1  
2  
3  
4  
5  
6 511 50. doi:10.1016/0168-8510(91)90095-F  
7  
8  
9 512 24 Costa N, Ferlicq L, Derumeaux-burel H, *et al.* Comparison of Informal Care  
10  
11  
12 513 Time and Costs in Different Age-Related Dementias : A Review. *Biomed Res Int*  
13  
14  
15 514 2013;**2013**:1–15.  
16  
17  
18 515 25 Åkerborg Ö, Lang A, Wimo A, *et al.* Cost of Dementia and Its Correlation With  
19  
20  
21 516 Dependence. *J Aging Health* Published Online First: 26 January 2016.  
22  
23  
24 517 doi:10.1177/0898264315624899  
25  
26  
27 518 26 Bergvall N, Brinck P, Eek D, *et al.* Relative importance of patient disease  
28  
29  
30 519 indicators on informal care and caregiver burden in Alzheimer ' s disease. *Int*  
31  
32  
33 520 *Psychogeriatrics* 2011;:73–85. doi:10.1017/S1041610210000785  
34  
35  
36 521 27 Rattinger G, Schwartz S, Mullins C, *et al.* Dementia severity and the longitudinal  
37  
38  
39 522 costs of informal care in the Cache County population. *Alzheimer's Dement*  
40  
41  
42 523 2015;**11**:946–54.  
43  
44  
45 524 28 Gustavsson A, Brinck P, Bergvall N, *et al.* Predictors of costs of care in  
46  
47  
48 525 Alzheimer's disease: a multinational sample of 1222 patients. *Alzheimers Dement*  
49  
50  
51 526 2011;**7**:318–27. doi:10.1016/j.jalz.2010.09.001  
52  
53  
54 527 29 Gervès C, Chauvin P, Bellanger MM. Evaluation of full costs of care for patients  
55  
56  
57 528 with Alzheimer ' s disease in France : The predominant role of informal care.  
58  
59  
60

- 1  
2  
3  
4  
5  
6 529 *Health Policy (New York)* 2014;**116**:114–22. doi:10.1016/j.healthpol.2014.01.001  
7  
8  
9 530 30 Dodel R, Belger M, Reed C, *et al.* Determinants of societal costs in Alzheimer’s  
10  
11  
12 531 disease: GERAS study baseline results. *Alzheimers Dement* 2015;**11**:933–45.  
13  
14  
15 532 doi:10.1016/j.jalz.2015.02.005  
16  
17  
18 533 31 Hurd MD, Martorell P, Delavande A, *et al.* Monetary Costs of Dementia in the  
19  
20  
21 534 United States. *N Engl J Med* 2013;**368**:1326–34. doi:10.1056/NEJMsa1204629  
22  
23  
24 535 32 Dodel R, Belger M, Reed C, *et al.* Determinants of societal costs in Alzheimer’s  
25  
26  
27 536 disease. *Alzheimer’s Dement* 2015;**11**:933–45.  
28  
29  
30 537 33 Peña-Longobardo L, Oliva-moreno J. Economic valuation and determinants of  
31  
32  
33 538 informal care to people with Alzheimer ’ s disease. *Eur J Heal Econ*  
34  
35  
36 539 2015;**16**:507–15. doi:10.1007/s10198-014-0604-6  
37  
38  
39 540 34 André Hajek , Christian Brettschneider, Annette Ernst, Tina Posselt, Birgitt  
40  
41  
42 541 Wiese, Jana Prokein, Siegfried Weyerer, Jochen Werle, Angela Fuchs et al.  
43  
44  
45 542 Longitudinal predictors of informal and formal caregiving time in community-  
46  
47  
48 543 dwelling dementia patients. *Soc Psychiatry Psychiatr Epidemiol* 2015;:1–10.  
49  
50  
51 544 35 Tokyo Metropolitan Government. *The Long-term Care Insurance System : Long-*  
52  
53  
54 545 *term Care Service Costs to Be Paid by th User.*  
55  
56  
57 546 [http://www.fukushihoken.metro.tokyo.jp/kourei/koho/kaigo\\_pamph.files/p.10kai](http://www.fukushihoken.metro.tokyo.jp/kourei/koho/kaigo_pamph.files/p.10kai)  
58  
59  
60

- 1  
2  
3  
4  
5  
6 547 gohoken-english.pdf (accessed 12 Feb 2019).  
7  
8  
9 548 36 Huei-Ru Lin, Tetsuya Otsubo and YI. The Effects of Dementia and Long-Term  
10  
11  
12 549 Care Services on the Deterioration of Care-needs Levels of the Elderly in Japan.  
13  
14  
15 550 *Medicine (Baltimore)* 2015;**94**:1–7.  
16  
17  
18 551 37 Michael D. Hurd, Paco Martorell, Adeline Delavande, Kathleen J. Mullen and  
19  
20  
21 552 KML. Monetary Costs of Dementia in the United States. *N Engl J Med*  
22  
23  
24 553 2013;**368**:1326–34. doi:10.1056/NEJMsa1204629.Monetary  
25  
26  
27 554 38 Ministry of Health Labour and Welfare. Reference case examples of long-term  
28  
29  
30 555 care insurance services for constructing community-based integrated care system.  
31  
32  
33 556 2016. <https://www.mhlw.go.jp/file/06-Seisakujouhou-12300000->  
34  
35  
36 557 [Roukenkyoku/guidebook-bunkatu1.pdf](https://www.mhlw.go.jp/file/06-Seisakujouhou-12300000-Roukenkyoku/guidebook-bunkatu1.pdf) (accessed 12 Feb 2019).  
37  
38  
39 558 39 König H, Leicht H, Brettschneider C, *et al.* The Costs of Dementia From the  
40  
41  
42 559 Societal Perspective : Is Care Provided in the Community Really Cheaper than  
43  
44  
45 560 Nursing Home Care ? *JAMDA* 2014;**15**:117–26.  
46  
47  
48 561 doi:10.1016/j.jamda.2013.10.003  
49  
50  
51 562 40 Eysenbach G. Improving the quality of Web surveys: the Checklist for Reporting  
52  
53  
54 563 Results of Internet E-Surveys (CHERRIES). *J Med Internet Res* 2004;**6**:e34.  
55  
56  
57 564 doi:10.2196/jmir.6.3.e34  
58  
59  
60

- 1  
2  
3  
4  
5  
6 565 41 Eysenbach G, Wyatt J. Using the Internet for Surveys and Health Research. *J*  
7  
8  
9 566 *Med Internet Res* 2002;**4**:e13. doi:10.2196/jmir.4.2.e13  
10  
11  
12 567 42 Fujihara S, Inoue A, Kubota K, *et al.* Caregiver Burden and Work Productivity  
13  
14  
15 568 Among Japanese Working Family Caregivers of People with Dementia. *Int J*  
16  
17  
18 569 *Behav Med* 2018;**1**–11. doi:10.1007/s12529-018-9753-9  
19  
20  
21 570 43 van Gelder MMHJ, Bretveld RW, Roeleveld N. Web-based Questionnaires: The  
22  
23  
24 571 Future in Epidemiology? *Am J Epidemiol* 2010;**172**:1292–8.  
25  
26  
27 572 doi:10.1093/aje/kwq291  
28  
29  
30 573 44 Washio S, Toyoshima Y, Yamazaki R, *et al.* [Factors related to the care burden  
31  
32  
33 574 of family caregivers - focusing on the care burden of caregivers of elderly who  
34  
35  
36 575 needs nursing care -]. *Japanese J Clin Exp Med = Rinshou to Kenkyuu*  
37  
38  
39 576 2012;**89**:1687–91.  
40  
41  
42 577 45 Arai Y, Kumamoto K, Mizuno Y, *et al.* Depression among family caregivers of  
43  
44  
45 578 community-dwelling older people who used services under the Long Term Care  
46  
47  
48 579 Insurance program: a large-scale population-based study in Japan. *Aging Ment*  
49  
50  
51 580 *Health* 2014;**18**:81–91. doi:10.1080/13607863.2013.787045  
52  
53  
54 581 46 Washio S, Nogami Y, Motoyama S, *et al.* [Long-Term Care Insurance Act  
55  
56  
57 582 amendment and care burden of family caregivers for elderly who need long-term  
58  
59  
60



1  
2  
3  
4  
5  
6 583 care at home]. *Japanese J Clin Exp Med = Rinshou to Kenkyuu* 2015;**92**:75–9.  
7  
8

9 584  
10  
11  
12  
13  
14  
15  
16  
17  
18  
19  
20  
21  
22  
23  
24  
25  
26  
27  
28  
29  
30  
31  
32  
33  
34  
35  
36  
37  
38  
39  
40  
41  
42  
43  
44  
45  
46  
47  
48  
49  
50  
51  
52  
53  
54  
55  
56  
57  
58  
59  
60

For peer review only

1  
2  
3  
4  
5  
6  
7 **Figure 1: Selection process for the analysis**  
8

9 This diagram shows the flow of participants who we focused on.  
10  
11

12 **Figure 2: Classification tree of chi-square automatic interaction detection for**  
13 **informal care costs**  
14  
15

16 The dendogram illustrates the combinations of independent variables to clarify who need  
17 or provide more informal care.  
18  
19

20 Abbreviations: ADL, Activities of Daily Living; IADL, Instrumental Activities of Daily  
21 Living; SD, Standard deviation; LTC, Long-term care  
22  
23

24 **Figure 3: Classification tree of chi-square automatic interaction detection for out-**  
25 **of-pocket payments for LTC services covered by insurance**  
26  
27

28 The dendogram illustrates the combinations of independent variables to clarify who need  
29 more LTC insurance services.  
30  
31

32 Abbreviations: ADL, Activities of Daily Living; IADL, Instrumental Activities of Daily  
33 Living; SD, Standard deviation; LTC, Long-term care  
34  
35

36 **Figure 4: Classification tree of chi-square automatic interaction detection for out-**  
37 **of-pocket payments for LTC services not covered by insurance**  
38  
39

40 The dendogram illustrates the combinations of independent variables to clarify who need  
41 more LTC services without insurance.  
42  
43  
44  
45  
46  
47  
48  
49  
50  
51  
52  
53  
54  
55  
56  
57  
58  
59  
60

1  
2  
3  
4  
5  
6 Abbreviations: ADL, Activities of Daily Living; IADL, Instrumental Activities of Daily  
7  
8  
9 Living; SD, Standard deviation; LTC, Long-term care  
10  
11  
12  
13  
14  
15  
16  
17  
18  
19  
20  
21  
22  
23  
24  
25  
26  
27  
28  
29  
30  
31  
32  
33  
34  
35  
36  
37  
38  
39  
40  
41  
42  
43  
44  
45  
46  
47  
48  
49  
50  
51  
52  
53  
54  
55  
56  
57  
58  
59  
60

For peer review only

**Table 1 Characteristics of people with dementia and caregivers**

| <b>People with Dementia</b>                       |  | N=1383     |
|---------------------------------------------------|--|------------|
| Age, mean±SD, y                                   |  | 81.8±10.3  |
| Sex, n (%)                                        |  |            |
| Female                                            |  | 922 (66.7) |
| Male                                              |  | 461 (33.3) |
| Care-needs level, n (%)                           |  |            |
| Support-Needs Level 1-2                           |  | 253 (18.3) |
| Care-Needs Level 1                                |  | 310 (22.4) |
| Care-Needs Level 2                                |  | 335 (24.2) |
| Care-Needs Level 3                                |  | 258 (18.7) |
| Care-Needs Level 4                                |  | 122 (8.8)  |
| Care-Needs Level 5                                |  | 105 (7.6)  |
| ADL/IADL functional capabilities                  |  |            |
| ADL score (0-6), mean±SD                          |  | 3.2±2.0    |
| IADL score (0-7), mean±SD                         |  | 1.3±1.6    |
| Ratio of copayments for healthcare services, n(%) |  |            |
| 10%                                               |  | 961 (69.5) |
| 20%                                               |  | 137 (9.9)  |
| 30%                                               |  | 157 (11.4) |
| Unknown                                           |  | 128 (9.3)  |
| <b>Types of Dementia, n(%)</b>                    |  |            |
| Alzheimer's disease                               |  | 751 (54.3) |
| <b>Caregivers</b>                                 |  |            |
| Age, mean ± SD                                    |  | 52.2±13.1  |
| Sex, n (%)                                        |  |            |
| Female                                            |  | 530 (38.3) |
| Male                                              |  | 853 (61.7) |
| Relationship, n (%)                               |  |            |
| Mother                                            |  | 575 (41.6) |
| Mother-in-law                                     |  | 169 (12.2) |
| Father                                            |  | 288 (20.8) |
| Father-in-law                                     |  | 90 (6.5)   |
| Spouse                                            |  | 99 (7.2)   |
| Sibling                                           |  | 11 (0.8)   |
| Child                                             |  | 10 (0.7)   |
| Friend                                            |  | 5 (0.4)    |
| Other (including grandparents)                    |  | 136 (9.8)  |
| Contribution level for caregiving, n (%)          |  |            |
| 1-20%                                             |  | 395 (28.6) |
| 21-40%                                            |  | 355 (25.7) |
| 41-60%                                            |  | 241 (17.4) |
| 61-80%                                            |  | 166 (12.0) |
| 81-100%                                           |  | 226 (16.3) |
| Currently employed, n (%)                         |  | 532 (38.5) |

SD: Standard deviation, ADL: Activities of Daily Living, IADL: Instrumental Activities

of Daily Living

For peer review only

1  
2  
3  
4  
5  
6  
7  
8  
9  
10  
11  
12  
13  
14  
15  
16  
17  
18  
19  
20  
21  
22  
23  
24  
25  
26  
27  
28  
29  
30  
31  
32  
33  
34  
35  
36  
37  
38  
39  
40  
41  
42  
43  
44  
45  
46  
47  
48  
49  
50  
51  
52  
53  
54  
55  
56  
57  
58  
59  
60

585 **Table 2 Daily informal care time and personal costs of dementia care sorted by care-needs levels**

|                                             |                                                            |              | Support-<br>required level | Care-need<br>level 1 | Care-need<br>level 2 | Care-need<br>level 3 | Care-need<br>level 4 | Care-need<br>level 5 |
|---------------------------------------------|------------------------------------------------------------|--------------|----------------------------|----------------------|----------------------|----------------------|----------------------|----------------------|
| Informal care<br>time<br>(hours/day)        | ADL                                                        | Mean [SD]    | 2.56 [3.23]                | 2.23 [2.54]          | 2.92 [2.90]          | 3.44 [2.90]          | 3.99 [2.40]          | 4.60 [3.85]          |
|                                             |                                                            | Median [IQR] | 1.67 [2.00]                | 1.50 [2.50]          | 2.00 [3.00]          | 3.00 [3.50]          | 4.00 [3.00]          | 3.33 [4.00]          |
|                                             | IADL                                                       | Mean [SD]    | 2.35 [2.62]                | 2.46 [3.05]          | 2.88 [3.26]          | 2.82 [2.92]          | 3.03 [2.59]          | 3.45 [3.77]          |
|                                             |                                                            | Median [IQR] | 2.00 [2.00]                | 1.50 [2.00]          | 2.00 [2.00]          | 2.00 [2.50]          | 2.00 [3.13]          | 2.00 [4.00]          |
| Personal cost<br>of dementia<br>care (US\$) | Informal<br>care cost                                      | Mean [SD]    | 1518 [2017]                | 1271 [1526]          | 1754 [1982]          | 2181 [2220]          | 2112 [2104]          | 2672 [2314]          |
|                                             |                                                            | Median [IQR] | 747 [1646]                 | 709 [1440]           | 1090 [1697]          | 1366 [2459]          | 1535 [1466]          | 1939 [2240]          |
|                                             | OPP for<br>LTC<br>services<br>covered by<br>insurance      | Mean [SD]    | 148 [190]                  | 158 [174]            | 244 [209]            | 313 [217]            | 301 [202]            | 318 [218]            |
|                                             |                                                            | Median [IQR] | 49 [172]                   | 49 [123]             | 172 [319]            | 368 [441]            | 368 [196]            | 368 [441]            |
|                                             | OPP for<br>care<br>services not<br>covered by<br>insurance | Mean [SD]    | 158 [336]                  | 95 [156]             | 278 [695]            | 303 [543]            | 241 [579]            | 352 [998]            |
|                                             |                                                            | Median [IQR] | 49 [172]                   | 49 [172]             | 49 [368]             | 172 [319]            | 49 [368]             | 49 [368]             |

586 ADL: Activities of Daily Living, IADL: Instrumental Activities of Daily Living, SD: Standard deviation, IQR: Interquartile range

587 OPP: Out-of-pocket payments LTC: Long-term care

588

Figure 1

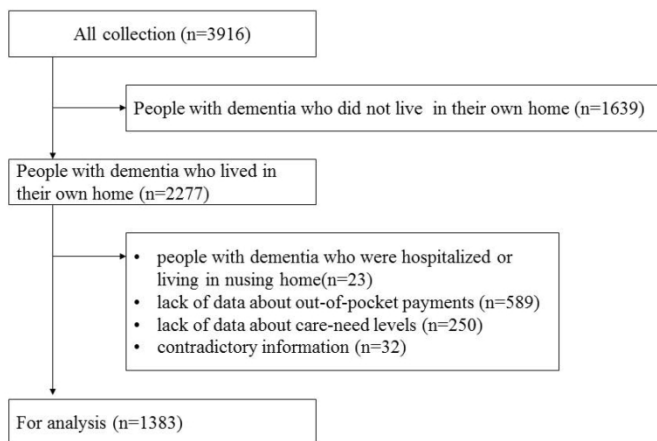

Figure 1: Selection process for the analysis  
This diagram shows the flow of participants who we focused on.

338x190mm (300 x 300 DPI)

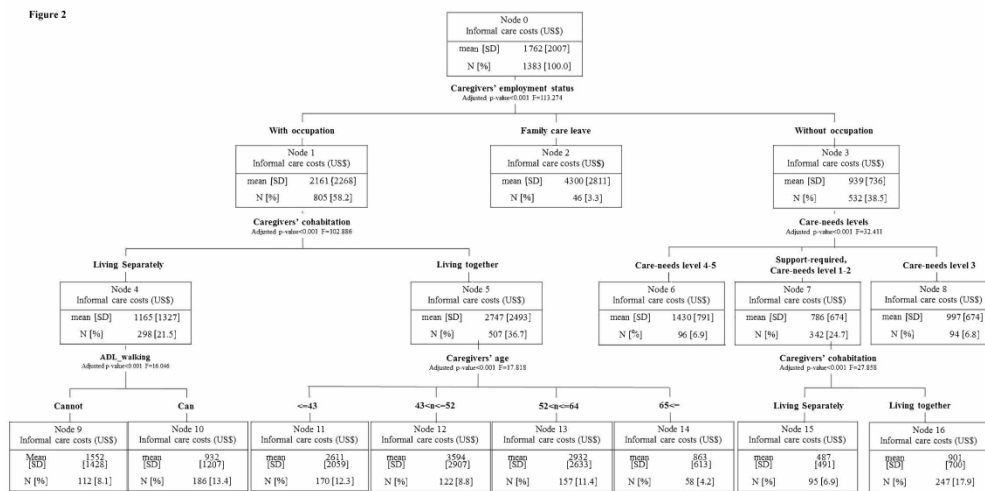

Figure 2: Classification tree of chi-square automatic interaction detection for informal care costs  
 The dendrogram illustrates the combinations of independent variables to clarify who need or provide more informal care.

Abbreviations: ADL, Activities of Daily Living; IADL, Instrumental Activities of Daily Living; SD, Standard deviation; LTC, Long-term care

600x300mm (300 x 300 DPI)



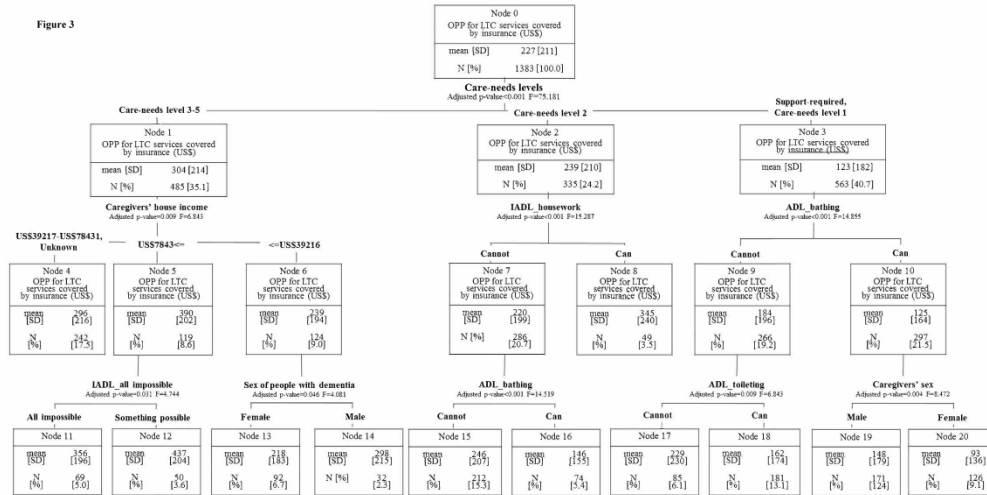

Figure 3: Classification tree of chi-square automatic interaction detection for out-of-pocket payments for LTC services covered by insurance  
 The dendrogram illustrates the combinations of independent variables to clarify who need more LTC insurance services.  
 Abbreviations: ADL, Activities of Daily Living; IADL, Instrumental Activities of Daily Living; SD, Standard deviation; LTC, Long-term care

600x300mm (300 x 300 DPI)



Figure 4: Classification tree of chi-square automatic interaction detection for out-of-pocket payments for LTC services not covered by insurance  
The dendrogram illustrates the combinations of independent variables to clarify who need more LTC services without insurance.  
Abbreviations: ADL, Activities of Daily Living; IADL, Instrumental Activities of Daily Living; SD, Standard deviation; LTC, Long-term care

600x300mm (300 x 300 DPI)

STROBE Statement—Checklist of items that should be included in reports of *cross-sectional studies*

|                              | Item No | Recommendation                                                                                                                                                                                                                                                                                                                                                                                        |
|------------------------------|---------|-------------------------------------------------------------------------------------------------------------------------------------------------------------------------------------------------------------------------------------------------------------------------------------------------------------------------------------------------------------------------------------------------------|
| <b>Title and abstract</b>    | 1       | (a) Indicate the study's design with a commonly used term in the title or the abstract - p.1-2<br>(b) Provide in the abstract an informative and balanced summary of what was done and what was found – p.2-3                                                                                                                                                                                         |
| <b>Introduction</b>          |         |                                                                                                                                                                                                                                                                                                                                                                                                       |
| Background/rationale         | 2       | Explain the scientific background and rationale for the investigation being reported – p.4-5                                                                                                                                                                                                                                                                                                          |
| Objectives                   | 3       | State specific objectives, including any prespecified hypotheses – p.5                                                                                                                                                                                                                                                                                                                                |
| <b>Methods</b>               |         |                                                                                                                                                                                                                                                                                                                                                                                                       |
| Study design                 | 4       | Present key elements of study design early in the paper – p.5                                                                                                                                                                                                                                                                                                                                         |
| Setting                      | 5       | Describe the setting, locations, and relevant dates, including periods of recruitment, exposure, follow-up, and data collection – p.6                                                                                                                                                                                                                                                                 |
| Participants                 | 6       | (a) Give the eligibility criteria, and the sources and methods of selection of participants – p.6 and p.10                                                                                                                                                                                                                                                                                            |
| Variables                    | 7       | Clearly define all outcomes, exposures, predictors, potential confounders, and effect modifiers. Give diagnostic criteria, if applicable – p.6-10                                                                                                                                                                                                                                                     |
| Data sources/<br>measurement | 8*      | For each variable of interest, give sources of data and details of methods of assessment (measurement). Describe comparability of assessment methods if there is more than one group – p.6, 9                                                                                                                                                                                                         |
| Bias                         | 9       | Describe any efforts to address potential sources of bias – p.18-19                                                                                                                                                                                                                                                                                                                                   |
| Study size                   | 10      | Explain how the study size was arrived at – p.6                                                                                                                                                                                                                                                                                                                                                       |
| Quantitative variables       | 11      | Explain how quantitative variables were handled in the analyses. If applicable, describe which groupings were chosen and why – p.11-12                                                                                                                                                                                                                                                                |
| Statistical methods          | 12      | (a) Describe all statistical methods, including those used to control for confounding – p.11-12<br>(b) Describe any methods used to examine subgroups and interactions – p.11-12<br>(c) Explain how missing data were addressed-p.10<br>(d) If applicable, describe analytical methods taking account of sampling strategy – Non applicable<br>(e) Describe any sensitivity analyses – Non applicable |
| <b>Results</b>               |         |                                                                                                                                                                                                                                                                                                                                                                                                       |
| Participants                 | 13*     | (a) Report numbers of individuals at each stage of study—eg numbers potentially eligible, examined for eligibility, confirmed eligible, included in the study, completing follow-up, and analysed – p.12-13<br>(b) Give reasons for non-participation at each stage – Non applicable<br>(c) Consider use of a flow diagram - Figure 1                                                                 |
| Descriptive data             | 14*     | (a) Give characteristics of study participants (eg demographic, clinical, social) and information on exposures and potential confounders – p.13 and Table 1<br>(b) Indicate number of participants with missing data for each variable of interest – Non applicable                                                                                                                                   |
| Outcome data                 | 15*     | Report numbers of outcome events or summary measures – Table 2                                                                                                                                                                                                                                                                                                                                        |
| Main results                 | 16      | (a) Give unadjusted estimates and, if applicable, confounder-adjusted estimates and their precision (eg, 95% confidence interval). Make clear which confounders were adjusted for and why they were included –p.12-13                                                                                                                                                                                 |

|                          |    |                                                                                                                                                                                      |
|--------------------------|----|--------------------------------------------------------------------------------------------------------------------------------------------------------------------------------------|
|                          |    | (b) Report category boundaries when continuous variables were categorized – Non applicable                                                                                           |
|                          |    | (c) If relevant, consider translating estimates of relative risk into absolute risk for a meaningful time period – Non applicable                                                    |
| Other analyses           | 17 | Report other analyses done—eg analyses of subgroups and interactions, and sensitivity analyses – p.13, Figure2-4                                                                     |
| <b>Discussion</b>        |    |                                                                                                                                                                                      |
| Key results              | 18 | Summarise key results with reference to study objectives - p,14-15                                                                                                                   |
| Limitations              | 19 | Discuss limitations of the study, taking into account sources of potential bias or imprecision. Discuss both direction and magnitude of any potential bias – p.18-19                 |
| Interpretation           | 20 | Give a cautious overall interpretation of results considering objectives, limitations, multiplicity of analyses, results from similar studies, and other relevant evidence – p.15-18 |
| Generalisability         | 21 | Discuss the generalisability (external validity) of the study results –p.18-19                                                                                                       |
| <b>Other information</b> |    |                                                                                                                                                                                      |
| Funding                  | 22 | Give the source of funding and the role of the funders for the present study and, if applicable, for the original study on which the present article is based - p.21                 |

\*Give information separately for exposed and unexposed groups.

**Note:** An Explanation and Elaboration article discusses each checklist item and gives methodological background and published examples of transparent reporting. The STROBE checklist is best used in conjunction with this article (freely available on the Web sites of PLoS Medicine at <http://www.plosmedicine.org/>, Annals of Internal Medicine at <http://www.annals.org/>, and Epidemiology at <http://www.epidem.com/>). Information on the STROBE Initiative is available at [www.strobe-statement.org](http://www.strobe-statement.org).
